# Supplementary material for: Design and Synthesis of Dimethylaminomethyl-Substituted Curcumin Derivatives: Potent Anti-Inflammatory, Anti-Oxidant, and Radioprotection Activity, Improved Aqueous Solubility Compared with Curcumin
Source: MDPI journal article supplement (doi:10.3390/molecules29091985), 2024-04-26
Supplement: s1 [file s1]

## Supplementary Material

### Section 1: Raw data for in vitro activity evaluation.

Table S1. Inhibitory effects of the curcumin derivatives **1-15** and their acetates **1a-15a** on LPS-induced NO production.

| Group       | The production of NO |                   |                   |                  |
|-------------|----------------------|-------------------|-------------------|------------------|
|             | Dose (5 $\mu$ M)     | Dose (10 $\mu$ M) | Dose (15 $\mu$ M) | Dose (0 $\mu$ M) |
| Control     |                      |                   |                   | 1.20 $\pm$ 0.38  |
| LPS         |                      |                   |                   | 49.86 $\pm$ 0.62 |
| Curcumin    | 37.00 $\pm$ 1.12     | 21.55 $\pm$ 1.29  | 5.96 $\pm$ 0.03   |                  |
| Compound 1  | 44.55 $\pm$ 0.55     | 34.25 $\pm$ 0.96  | 12.30 $\pm$ 0.90  |                  |
| Compound 2  | 43.78 $\pm$ 1.52     | 42.04 $\pm$ 1.70  | 36.99 $\pm$ 1.85  |                  |
| Compound 3  | 39.26 $\pm$ 2.12     | 30.62 $\pm$ 1.71  | 10.36 $\pm$ 3.69  |                  |
| Compound 4  | 40.64 $\pm$ 1.28     | 29.91 $\pm$ 1.78  | 10.48 $\pm$ 0.47  |                  |
| Compound 5  | 34.62 $\pm$ 0.76     | 16.89 $\pm$ 1.33  | 9.97 $\pm$ 1.11   |                  |
| Compound 6  | 27.16 $\pm$ 2.73     | 14.67 $\pm$ 3.66  | 5.95 $\pm$ 0.13   |                  |
| Compound 7  | 35.15 $\pm$ 2.72     | 18.46 $\pm$ 2.34  | 10.47 $\pm$ 1.32  |                  |
| Compound 8  | 42.90 $\pm$ 0.85     | 20.21 $\pm$ 1.82  | 5.46 $\pm$ 0.34   |                  |
| Compound 9  | 42.38 $\pm$ 2.73     | 29.76 $\pm$ 1.48  | 19.69 $\pm$ 0.78  |                  |
| Compound 10 | 36.66 $\pm$ 2.00     | 15.36 $\pm$ 2.09  | 4.91 $\pm$ 0.77   |                  |
| Compound 11 | 35.85 $\pm$ 0.30     | 19.36 $\pm$ 1.66  | 7.59 $\pm$ 0.35   |                  |
| Compound 12 | 32.06 $\pm$ 0.58     | 15.78 $\pm$ 0.50  | 11.39 $\pm$ 1.00  |                  |
| Compound 13 | 26.57 $\pm$ 1.74     | 21.53 $\pm$ 0.35  | 10.02 $\pm$ 0.61  |                  |
| Compound 14 | 27.84 $\pm$ 1.41     | 22.09 $\pm$ 0.55  | 9.39 $\pm$ 0.34   |                  |
| Compound 15 | 41.85 $\pm$ 1.07     | 28.31 $\pm$ 0.33  | 14.00 $\pm$ 0.92  |                  |
| Compound 1a | 44.93 $\pm$ 0.35     | 32.32 $\pm$ 1.94  | 5.77 $\pm$ 0.09   |                  |
| Compound 2a | 41.89 $\pm$ 1.95     | 38.68 $\pm$ 0.96  | 36.24 $\pm$ 0.50  |                  |
| Compound 3a | 32.92 $\pm$ 2.00     | 16.27 $\pm$ 1.74  | 5.29 $\pm$ 0.97   |                  |

|              |              |              |              |
|--------------|--------------|--------------|--------------|
| Compound 4a  | 31.54 ± 1.30 | 20.51 ± 1.88 | 9.45 ± 1.96  |
| Compound 5a  | 33.90 ± 1.94 | 15.60 ± 2.78 | 9.88 ± 0.53  |
| Compound 6a  | 27.02 ± 2.91 | 14.29 ± 1.71 | 5.23 ± 0.72  |
| Compound 7a  | 35.35 ± 1.59 | 16.83 ± 0.42 | 9.77 ± 0.63  |
| Compound 8a  | 35.08 ± 2.53 | 16.57 ± 1.70 | 4.61 ± 0.29  |
| Compound 9a  | 36.91 ± 0.59 | 21.33 ± 0.19 | 11.29 ± 0.25 |
| Compound 10a | 24.20 ± 1.36 | 7.81 ± 0.85  | 3.91 ± 0.22  |
| Compound 11a | 35.82 ± 1.34 | 15.68 ± 3.02 | 4.63 ± 0.40  |
| Compound 12a | 18.38 ± 1.63 | 12.76 ± 0.83 | 9.05 ± 0.72  |
| Compound 13a | 17.80 ± 2.19 | 9.09 ± 1.21  | 5.58 ± 0.11  |
| Compound 14a | 29.10 ± 0.37 | 13.47 ± 0.31 | 7.49 ± 0.40  |
| Compound 15a | 33.79 ± 2.90 | 17.01 ± 0.60 | 4.71 ± 0.18  |

Table S2. Protection effects of the curcumin derivatives **1-15** and their acetates **1a-15a** on H<sub>2</sub>O<sub>2</sub>-induced oxidative damage.

| Group                         | Cell viability |              |               |              |
|-------------------------------|----------------|--------------|---------------|--------------|
|                               | Dose (5 μM)    | Dose (10 μM) | Dose (20 μM)  | Dose (0 μM)  |
| Control                       |                |              |               | 100          |
| H <sub>2</sub> O <sub>2</sub> |                |              |               | 49.69 ± 1.37 |
| Curcumin                      | 59.57 ± 2.21   | 71.83 ± 1.52 | 86.38 ± 1.28  |              |
| Compound 1                    | 63.89 ± 2.86   | 74.67 ± 4.82 | 86.42 ± 3.89  |              |
| Compound 2                    | 55.71 ± 0.79   | 58.21 ± 0.80 | 63.41 ± 1.13  |              |
| Compound 3                    | 64.73 ± 2.69   | 71.68 ± 3.77 | 81.68 ± 2.41  |              |
| Compound 4                    | 61.70 ± 2.59   | 70.99 ± 2.33 | 84.68 ± 2.76  |              |
| Compound 5                    | 71.02 ± 0.56   | 84.44 ± 1.86 | 102.52 ± 3.36 |              |
| Compound 6                    | 56.61 ± 1.66   | 67.85 ± 1.91 | 94.89 ± 0.58  |              |
| Compound 7                    | 54.43 ± 1.18   | 61.94 ± 1.29 | 78.25 ± 1.43  |              |
| Compound 8                    | 64.58 ± 1.64   | 67.81 ± 2.26 | 81.67 ± 3.21  |              |
| Compound 9                    | 53.22 ± 0.26   | 58.53 ± 0.46 | 66.09 ± 1.09  |              |

|              |              |              |               |
|--------------|--------------|--------------|---------------|
| Compound 10  | 53.53 ± 2.28 | 58.20 ± 1.24 | 77.80 ± 2.65  |
| Compound 11  | 63.24 ± 1.07 | 72.52 ± 0.32 | 96.33 ± 1.04  |
| Compound 12  | 60.69 ± 1.53 | 70.31 ± 1.65 | 79.23 ± 1.18  |
| Compound 13  | 62.94 ± 0.50 | 69.55 ± 1.06 | 80.61 ± 0.83  |
| Compound 14  | 59.32 ± 2.89 | 65.73 ± 2.40 | 74.30 ± 1.25  |
| Compound 15  | 60.18 ± 1.41 | 71.98 ± 3.71 | 87.82 ± 1.77  |
| Compound 1a  | 66.25 ± 1.36 | 80.18 ± 1.38 | 89.36 ± 1.63  |
| Compound 2a  | 56.60 ± 0.54 | 61.51 ± 1.77 | 65.65 ± 1.31  |
| Compound 3a  | 61.60 ± 3.89 | 72.94 ± 2.65 | 86.90 ± 1.63  |
| Compound 4a  | 67.52 ± 3.31 | 75.00 ± 2.39 | 86.52 ± 5.31  |
| Compound 5a  | 75.15 ± 5.90 | 84.53 ± 2.36 | 106.17 ± 3.34 |
| Compound 6a  | 60.05 ± 5.39 | 76.41 ± 2.29 | 100.96 ± 1.07 |
| Compound 7a  | 54.89 ± 1.04 | 62.07 ± 4.16 | 79.65 ± 3.04  |
| Compound 8a  | 74.54 ± 1.42 | 81.49 ± 3.47 | 87.62 ± 2.98  |
| Compound 9a  | 63.56 ± 2.88 | 70.76 ± 3.98 | 81.08 ± 2.61  |
| Compound 10a | 54.92 ± 1.34 | 64.71 ± 2.00 | 83.99 ± 4.36  |
| Compound 11a | 61.54 ± 1.46 | 73.69 ± 3.89 | 97.27 ± 1.95  |
| Compound 12a | 76.29 ± 3.14 | 81.94 ± 2.30 | 88.14 ± 2.09  |
| Compound 13a | 71.47 ± 2.53 | 77.92 ± 3.02 | 90.25 ± 3.77  |
| Compound 14a | 68.03 ± 3.05 | 77.10 ± 0.64 | 81.93 ± 1.35  |
| Compound 15a | 62.21 ± 2.53 | 72.52 ± 2.02 | 89.22 ± 0.36  |

Table S3. Protection effects of the curcumin derivatives **1-15** and their acetates **1a-15a** on Radiation.

| Group     | Cell viability |              |              |              |
|-----------|----------------|--------------|--------------|--------------|
|           | Dose (5 µM)    | Dose (10 µM) | Dose (20 µM) | Dose (0 µM)  |
| Control   |                |              |              |              |
| Radiation |                |              |              | 50.22 ± 1.08 |
| Curcumin  | 55.12 ± 1.37   | 59.39 ± 0.57 | 75.47 ± 0.68 |              |

---

|              |              |              |               |
|--------------|--------------|--------------|---------------|
| Compound 1   | 47.61 ± 1.20 | 57.30 ± 1.29 | 89.72 ± 8.17  |
| Compound 2   | 50.96 ± 1.31 | 52.89 ± 2.05 | 54.68 ± 1.78  |
| Compound 3   | 49.57 ± 2.70 | 51.85 ± 2.04 | 57.44 ± 1.80  |
| Compound 4   | 49.46 ± 1.97 | 51.75 ± 0.40 | 59.56 ± 0.59  |
| Compound 5   | 58.70 ± 4.93 | 64.93 ± 4.67 | 104.23 ± 2.86 |
| Compound 6   | 58.25 ± 1.05 | 62.18 ± 1.03 | 83.08 ± 6.65  |
| Compound 7   | 61.54 ± 2.47 | 63.26 ± 3.00 | 69.98 ± 4.31  |
| Compound 8   | 53.58 ± 0.78 | 55.23 ± 1.26 | 78.50 ± 2.59  |
| Compound 9   | 56.32 ± 1.77 | 59.94 ± 1.26 | 65.00 ± 1.84  |
| Compound 10  | 58.43 ± 1.95 | 63.89 ± 2.22 | 79.31 ± 3.13  |
| Compound 11  | 65.09 ± 0.40 | 84.55 ± 3.40 | 94.25 ± 4.35  |
| Compound 12  | 56.58 ± 1.03 | 63.12 ± 1.52 | 76.81 ± 1.27  |
| Compound 13  | 61.42 ± 1.58 | 67.83 ± 2.32 | 87.38 ± 0.60  |
| Compound 14  | 53.08 ± 0.34 | 54.44 ± 0.72 | 63.52 ± 1.49  |
| Compound 15  | 58.64 ± 0.61 | 63.45 ± 0.21 | 76.99 ± 1.23  |
| Compound 1a  | 60.01 ± 5.39 | 62.85 ± 6.12 | 75.47 ± 0.68  |
| Compound 2a  | 57.71 ± 4.12 | 61.56 ± 4.11 | 92.24 ± 6.04  |
| Compound 3a  | 57.10 ± 3.05 | 64.19 ± 0.94 | 69.11 ± 2.51  |
| Compound 4a  | 56.43 ± 3.51 | 61.48 ± 3.74 | 97.55 ± 3.44  |
| Compound 5a  | 58.17 ± 1.86 | 68.65 ± 5.90 | 104.65 ± 5.01 |
| Compound 6a  | 65.56 ± 2.17 | 71.70 ± 2.56 | 84.86 ± 6.57  |
| Compound 7a  | 62.11 ± 1.39 | 65.49 ± 2.03 | 75.74 ± 2.05  |
| Compound 8a  | 60.33 ± 1.38 | 62.24 ± 0.75 | 81.89 ± 2.94  |
| Compound 9a  | 56.88 ± 1.03 | 60.92 ± 1.55 | 70.15 ± 2.99  |
| Compound 10a | 61.98 ± 2.45 | 67.94 ± 4.69 | 81.14 ± 3.72  |
| Compound 11a | 60.93 ± 1.64 | 64.92 ± 0.58 | 106.32 ± 7.58 |
| Compound 12a | 59.04 ± 1.00 | 63.19 ± 1.90 | 77.34 ± 2.18  |
| Compound 13a | 66.55 ± 2.11 | 75.50 ± 1.73 | 88.50 ± 1.18  |
| Compound 14a | 64.83 ± 0.66 | 68.68 ± 1.31 | 77.66 ± 1.75  |

---

|              |              |              |              |
|--------------|--------------|--------------|--------------|
| Compound 15a | 61.29 ± 1.82 | 65.00 ± 2.78 | 77.64 ± 1.03 |
|--------------|--------------|--------------|--------------|

**Section 2:** Structure data of curcumin derivatives **1-15** and their acetates **1a-15a**.

(1E,6E)-1-(3-((dimethylamino)methyl)-4-hydroxy-5-methoxyphenyl)-7-(3-ethoxy-4-hydroxyphenyl)hepta-1,6-diene-3,5-dione (**1**) <sup>1</sup>H NMR (600 MHz, CD<sub>3</sub>OD) δ 7.57 (d, *J* = 15.6 Hz, 1H), 7.37 (s, 1H), 7.23 (d, *J* = 37.0 Hz, 2H), 7.12 (s, 2H), 7.03 (s, 1H), 6.83 (d, *J* = 8.1 Hz, 1H), 6.76 (s, 1H), 6.63 (d, *J* = 15.6 Hz, 1H), 5.33 (s, 1H), 4.32 (s, 2H), 4.15 (d, *J* = 6.9 Hz, 2H), 3.97 (s, 2H), 3.90 (s, 3H), 2.85 (s, 6H), 1.45 (t, *J* = 6.8 Hz, 3H). <sup>13</sup>C NMR (151 MHz, DMSO-*d*<sub>6</sub>) δ 183.67, 183.62, 150.09, 148.29, 147.59, 141.22, 139.88, 126.79, 125.69, 123.51, 121.53, 116.26, 113.14, 110.93, 101.26, 64.39, 60.61, 56.21, 44.56, 40.53, 15.18. HRMS(ESI) *m/z*: calcd for C<sub>25</sub>H<sub>30</sub>NO<sub>6</sub><sup>+</sup> [M+H]<sup>+</sup>: 440.2073, found: 440.2069. Yield: 22.56%.

(1E,6E)-1-(3-((dimethylamino)methyl)-4-hydroxy-5-methoxyphenyl)-7-(4-hydroxy-3,5-dimethoxyphenyl)hepta-1,6-diene-3,5-dione (**2**) <sup>1</sup>H NMR (600 MHz, DMSO-*d*<sub>6</sub>) δ 7.55 (dd, *J* = 15.7, 10.8 Hz, 2H), 7.26 (s, 1H), 7.05 (s, 2H), 6.78 (dd, *J* = 31.9, 15.8 Hz, 2H), 6.08 (s, 1H), 3.83 (s, 9H), 3.63 (s, 2H), 2.30 (s, 2H), 2.27 (s, 6H). <sup>13</sup>C NMR (151 MHz, DMSO-*d*<sub>6</sub>) δ 183.34, 182.96, 149.66, 148.12, 147.81, 140.98, 140.82, 138.41, 126.76, 125.20, 125.15, 122.90, 122.75, 121.46, 121.05, 110.51, 106.27, 100.79, 60.16, 59.83, 56.09, 55.73, 55.58, 44.07, 43.80. HRMS(ESI) *m/z*: calcd for C<sub>25</sub>H<sub>30</sub>NO<sub>7</sub><sup>+</sup> [M+H]<sup>+</sup>: 456.2022, found: 456.2016. Yield: 38.46%.

(1E,6E)-1-(3-((dimethylamino)methyl)-4-hydroxy-5-methoxyphenyl)-7-(4-hydroxy-2-methylphenyl)hepta-1,6-diene-3,5-dione (**3**) <sup>1</sup>H NMR (600 MHz, CD<sub>3</sub>OD) δ 7.84 (d, *J* = 15.6 Hz, 1H), 7.58 – 7.51 (m, 2H), 7.30 (d, *J* = 19.8 Hz, 2H), 7.08 (d, *J* = 38.5 Hz, 1H), 6.65 (d, *J* = 2.7 Hz, 2H), 6.53 (d, *J* = 15.6 Hz, 1H), 4.33 (d, *J* = 5.2 Hz, 2H), 3.95 (s, 3H), 3.90 (s, 2H), 2.88 (s, 7H), 2.34 (s, 3H). <sup>13</sup>C NMR (151 MHz, CD<sub>3</sub>OD) δ 190.50, 159.42, 148.58, 140.84, 139.93, 137.38, 127.74, 125.26, 125.09, 123.51, 121.29, 120.39, 116.97, 113.52, 109.75, 59.95, 59.86, 55.08, 54.69, 42.89. HRMS(ESI) *m/z*: calcd for C<sub>24</sub>H<sub>28</sub>NO<sub>5</sub><sup>+</sup> [M+H]<sup>+</sup>: 410.1967, found: 410.1962. Yield: 24.52%.

(1E,6E)-1-(3-((dimethylamino)methyl)-4-hydroxy-5-methoxyphenyl)-7-(2-fluoro-4-hydroxyphenyl)hepta-1,6-diene-3,5-dione (**4**) <sup>1</sup>H NMR (600 MHz, CD<sub>3</sub>OD) δ 7.70 (t, *J* = 8.7 Hz, 1H), 7.65 – 7.36 (m, 4H), 6.83 (dd, *J* = 43.7, 15.9 Hz, 2H), 6.72 (dd, *J* = 20.3, 10.8 Hz, 2H),

4.26 (s, 2H), 3.92 (s, 3H), 2.73 (s, 6H), 2.51 (s, 2H).  $^{13}\text{C}$  NMR (151 MHz,  $\text{CD}_3\text{OD}$ )  $\delta$  184.00, 182.34, 163.41, 161.74, 151.21, 148.56, 141.03, 132.49, 129.61, 129.58, 125.28, 123.69, 122.35, 120.54, 112.27, 109.89, 102.77, 59.89, 59.58, 55.08, 42.79. HRMS(ESI)  $m/z$ : calcd for  $\text{C}_{23}\text{H}_{25}\text{FNO}_5^+$   $[\text{M}+\text{H}]^+$ : 414.1716, found: 414.1714. Yield: 27.96%

(1E,6E)-1-(3,4-dimethoxyphenyl)-7-(3-((dimethylamino)methyl)-4-hydroxy-5-methoxyphenyl)hepta-1,6-diene-3,5-dione (**5**)  $^1\text{H}$  NMR (600 MHz,  $\text{CD}_3\text{OD}$ )  $\delta$  7.54 (dd,  $J$  = 15.6, 5.3 Hz, 2H), 7.31 (s, 1H), 7.25 (s, 1H), 7.18 (s, 1H), 7.14 (d,  $J$  = 8.1 Hz, 1H), 6.93 (d,  $J$  = 8.2 Hz, 1H), 6.67 (dd,  $J$  = 38.5, 15.7 Hz, 2H), 4.33 (s, 2H), 3.96 (s, 3H), 3.87 (s, 3H), 3.84 (s, 3H), 2.88 (s, 6H), 2.85 (s, 2H).  $^{13}\text{C}$  NMR (151 MHz,  $\text{DMSO}-d_6$ )  $\delta$  183.84, 183.45, 151.48, 149.50, 148.66, 141.03, 140.54, 128.03, 126.55, 126.20, 123.51, 122.73, 122.49, 117.79, 112.42, 112.15, 110.95, 101.62, 56.64, 56.10, 56.08, 42.33. HRMS(ESI)  $m/z$ : calcd for  $\text{C}_{25}\text{H}_{30}\text{NO}_6^+$   $[\text{M}+\text{H}]^+$ : 440.2073, found: 440.2068. Yield: 35.95%.

(1E,6E)-1-(3-((dimethylamino)methyl)-4-hydroxy-5-methoxyphenyl)-7-(2,3,4-trimethoxyphenyl)hepta-1,6-diene-3,5-dione (**6**)  $^1\text{H}$  NMR (600 MHz,  $\text{CD}_3\text{OD}$ )  $\delta$  7.83 (d,  $J$  = 16.0 Hz, 1H), 7.58 (d,  $J$  = 15.8 Hz, 1H), 7.42 (d,  $J$  = 8.8 Hz, 1H), 7.37 (s, 1H), 7.27 (s, 1H), 6.84 (dd,  $J$  = 8.7, 4.9 Hz, 1H), 6.74 (t,  $J$  = 15.8 Hz, 2H), 4.35 (s, 2H), 3.97 (s, 3H), 3.91 (d,  $J$  = 2.2 Hz, 3H), 3.89 (s, 3H), 3.83 (s, 3H), 2.89 (s, 6H), 2.86 (d,  $J$  = 12.6 Hz, 2H).  $^{13}\text{C}$  NMR (151 MHz,  $\text{DMSO}-d_6$ )  $\delta$  184.43, 182.88, 155.87, 153.11, 150.18, 148.31, 142.30, 141.59, 134.66, 125.67, 123.52, 123.42, 123.31, 121.57, 121.54, 110.93, 109.05, 101.71, 61.88, 60.93, 60.54, 56.52, 56.21, 44.54. HRMS(ESI)  $m/z$ : calcd for  $\text{C}_{26}\text{H}_{32}\text{NO}_7^+$   $[\text{M}+\text{H}]^+$ : 470.2178, found: 470.2173. Yield: 11.23%.

(1E,6E)-1-(3-chloro-4-hydroxyphenyl)-7-(3-((dimethylamino)methyl)-4-hydroxy-5-methoxyphenyl)hepta-1,6-diene-3,5-dione (**7**)  $^1\text{H}$  NMR (600 MHz,  $\text{DMSO}-d_6$ )  $\delta$  11.13 (s, 1H), 10.78 (d,  $J$  = 50.4 Hz, 1H), 9.97 (d,  $J$  = 171.7 Hz, 1H), 7.79 (d,  $J$  = 4.8 Hz, 1H), 7.61 (s, 1H), 7.55 (dd,  $J$  = 16.1, 7.4 Hz, 3H), 7.47 (s, 1H), 7.18 (d,  $J$  = 8.4 Hz, 1H), 6.87 (dd,  $J$  = 29.7, 15.8 Hz, 2H), 4.31 (d,  $J$  = 35.9 Hz, 2H), 3.94 (d,  $J$  = 1.9 Hz, 3H), 2.74 (s, 6H), 2.73 – 2.69 (m, 2H).  $^{13}\text{C}$  NMR (151 MHz,  $\text{DMSO}-d_6$ )  $\delta$  183.84, 183.45, 151.48, 149.50, 148.66, 141.03, 140.55, 128.03, 126.55, 126.21, 123.52, 122.73, 122.49, 117.79, 112.42, 112.15, 110.95, 101.62, 56.64, 56.10, 56.08, 54.51, 42.33. HRMS(ESI)  $m/z$ : calcd for  $\text{C}_{23}\text{H}_{25}\text{ClNO}_5^+$   $[\text{M}+\text{H}]^+$ : 430.1421, found: 430.1416. Yield:

13.89%.

(1E,6E)-1-(3-((dimethylamino)methyl)-4-hydroxy-5-methoxyphenyl)-7-(4-hydroxy-3,5-dimethylphenyl)hepta-1,6-diene-3,5-dione (**8**)  $^1\text{H}$  NMR (600 MHz,  $\text{CD}_3\text{OD}$ )  $\delta$  7.52 (dd,  $J$  = 23.3, 15.8 Hz, 2H), 7.32 (s, 1H), 7.24 (s, 1H), 7.20 (s, 2H), 6.71 (d,  $J$  = 15.8 Hz, 1H), 6.56 (d,  $J$  = 15.8 Hz, 1H), 4.32 (s, 2H), 3.96 (s, 3H), 2.87 (s, 6H), 2.85 (s, 2H), 2.22 (s, 6H).  $^{13}\text{C}$  NMR (151 MHz,  $\text{CD}_3\text{OD}$ )  $\delta$  185.99, 183.27, 157.33, 149.57, 149.34, 142.81, 140.51, 130.09, 128.80, 127.76, 126.15, 126.02, 123.68, 122.99, 121.76, 117.79, 112.73, 112.60, 57.83, 57.49, 56.79, 43.35, 16.64. HRMS(ESI)  $m/z$ : calcd for  $\text{C}_{25}\text{H}_{30}\text{NO}_5^+$   $[\text{M}+\text{H}]^+$ : 424.2118, found: 424.2120. Yield: 25.53%.

(1E,6E)-1-(3-((dimethylamino)methyl)-4-hydroxy-5-methoxyphenyl)-7-(4-hydroxy-2-methoxyphenyl)hepta-1,6-diene-3,5-dione (**9**)  $^1\text{H}$  NMR (600 MHz,  $\text{CD}_3\text{OD}$ )  $\delta$  7.88 (d,  $J$  = 15.9 Hz, 1H), 7.54 (d,  $J$  = 15.7 Hz, 1H), 7.46 (d,  $J$  = 8.4 Hz, 1H), 7.33 (d,  $J$  = 22.5 Hz, 1H), 7.25 (s, 1H), 7.13 – 7.01 (m, 1H), 6.69 (dd,  $J$  = 46.0, 15.8 Hz, 2H), 6.47 – 6.36 (m, 2H), 4.33 (d,  $J$  = 12.9 Hz, 2H), 3.96 (s, 3H), 3.90 (s, 2H), 3.85 (d,  $J$  = 14.7 Hz, 3H), 2.87 (d,  $J$  = 18.2 Hz, 6H).  $^{13}\text{C}$  NMR (151 MHz,  $\text{DMSO}-d_6$ )  $\delta$  191.17, 162.03, 160.28, 149.98, 148.30, 140.90, 135.74, 130.46, 125.78, 123.37, 123.07, 121.61, 120.99, 114.91, 110.85, 108.84, 101.42, 99.60, 60.37, 56.20, 55.98, 55.35, 44.45. HRMS(ESI)  $m/z$ : calcd for  $\text{C}_{24}\text{H}_{28}\text{NO}_6^+$   $[\text{M}+\text{H}]^+$ : 426.1916, found: 426.1911. Yield: 10.80%.

(1E,6E)-1-(3-((dimethylamino)methyl)-4-hydroxy-5-methoxyphenyl)-7-(4-hydroxyphenyl)hepta-1,6-diene-3,5-dione (**10**)  $^1\text{H}$  NMR (600 MHz,  $\text{CD}_3\text{OD}$ )  $\delta$  7.61 – 7.53 (m, 2H), 7.46 (d,  $J$  = 8.5 Hz, 2H), 7.29 (d,  $J$  = 33.5 Hz, 2H), 6.82 (d,  $J$  = 8.5 Hz, 2H), 6.72 (d,  $J$  = 15.8 Hz, 1H), 6.58 (d,  $J$  = 15.8 Hz, 1H), 4.33 (s, 2H), 3.95 (s, 3H), 2.88 (s, 6H), 2.85 (s, 2H).  $^{13}\text{C}$  NMR (151 MHz,  $\text{CD}_3\text{OD}$ )  $\delta$  185.67, 183.56, 161.15, 149.56, 149.37, 142.21, 140.69, 131.25, 128.73, 127.87, 126.19, 123.67, 123.01, 122.02, 117.80, 116.92, 112.78, 104.14, 57.77, 57.42, 56.82, 56.61, 43.35. HRMS(ESI)  $m/z$ : calcd for  $\text{C}_{23}\text{H}_{26}\text{NO}_5^+$   $[\text{M}+\text{H}]^+$ : 396.1811, found: 396.1808. Yield: 10.59%.

(1E,6E)-1-(3-((dimethylamino)methyl)-4-hydroxy-5-methoxyphenyl)-7-(3-hydroxy-4-methoxyphenyl)hepta-1,6-diene-3,5-dione (**11**)  $^1\text{H}$  NMR (600 MHz,  $\text{CD}_3\text{OD}$ )  $\delta$  7.55 (dd,  $J$  = 25.6, 15.8 Hz, 2H), 7.29 (s, 1H), 7.16 – 7.05 (m, 3H), 6.95 (d,  $J$  = 8.3 Hz, 1H), 6.67 (d,  $J$  = 15.8 Hz, 1H), 6.58 (d,  $J$  = 15.8 Hz, 1H), 4.10 (s, 2H), 3.94 (s, 3H), 3.90 (s, 3H), 2.69 (s, 6H).  $^{13}\text{C}$  NMR (151 MHz,  $\text{CD}_3\text{OD}$ )  $\delta$  190.61, 149.99, 149.68, 148.45, 146.63, 140.54, 140.18, 128.30, 126.33, 124.30,

121.49, 118.65, 113.39, 111.18, 110.63, 57.81, 55.26, 55.02, 42.35. HRMS(ESI)  $m/z$ : calcd for  $C_{24}H_{28}NO_6^+$   $[M+H]^+$ : 426.1916, found: 426.1911. Yield: 15.63%.

(1E,6E)-1-(3-((dimethylamino)methyl)-4-hydroxy-5-methoxyphenyl)-7-(4-hydroxy-2,5-dimethylphenyl)hepta-1,6-diene-3,5-dione (**12**)  $^1H$  NMR (600 MHz, DMSO- $d_6$ )  $\delta$  9.81 (s, 1H), 7.78 (d,  $J$  = 9.5 Hz, 1H), 7.60 – 7.40 (m, 4H), 6.86 (d,  $J$  = 15.6 Hz, 1H), 6.80 – 6.61 (m, 2H), 4.32 (s, 2H), 3.93 (d,  $J$  = 5.3 Hz, 3H), 2.72 (s, 6H), 2.51 (s, 3H), 2.32 (s, 2H), 2.12 (s, 3H).  $^{13}C$  NMR (151 MHz,  $CD_3OD$ )  $\delta$  183.80, 182.88, 157.68, 150.71, 148.52, 140.48, 137.75, 137.39, 128.61, 125.62, 124.76, 123.65, 122.75, 120.83, 120.65, 116.20, 113.28, 109.92, 59.33, 55.12, 53.40, 42.75, 18.01, 14.43. HRMS(ESI)  $m/z$ : calcd for  $C_{25}H_{30}NO_5^+$   $[M+H]^+$ : 424.2124, found: 424.2118. Yield: 36.71%

(1E,6E)-1-(3-((dimethylamino)methyl)-4-hydroxy-5-methoxyphenyl)-7-(4-hydroxy-2,6-dimethylphenyl)hepta-1,6-diene-3,5-dione (**13**)  $^1H$  NMR (600 MHz,  $CD_3OD$ )  $\delta$  9.59 (s, 1H), 7.84 (d,  $J$  = 16.2 Hz, 1H), 7.60 (d,  $J$  = 15.8 Hz, 1H), 7.35 (dd,  $J$  = 5.5, 1.9 Hz, 2H), 7.20 (d,  $J$  = 1.8 Hz, 1H), 7.05 (d,  $J$  = 1.6 Hz, 1H), 6.64 (d,  $J$  = 15.8 Hz, 1H), 6.56 (s, 1H), 6.33 (d,  $J$  = 16.2 Hz, 1H), 4.04 (s, 2H), 3.92 (s, 2H), 3.89 (s, 3H), 2.65 (s, 6H), 2.45 (s, 3H), 2.37 (s, 3H).  $^{13}C$  NMR (151 MHz,  $CD_3OD$ )  $\delta$  190.52, 162.00, 161.80, 150.42, 148.45, 139.76, 132.56, 125.78, 123.30, 122.26, 121.13, 120.80, 109.84, 104.80, 91.66, 59.54, 55.11, 54.78, 42.83. HRMS(ESI)  $m/z$ : calcd for  $C_{25}H_{30}NO_5^+$   $[M+H]^+$ : 424.2124, found: 424.2119. Yield: 23.05%

(1E,6E)-1-(3-((dimethylamino)methyl)-4-hydroxy-5-methoxyphenyl)-7-(4-hydroxy-2,6-dimethoxyphenyl)hepta-1,6-diene-3,5-dione (**14**)  $^1H$  NMR (600 MHz,  $CD_3OD$ )  $\delta$  9.59 (s, 1H), 8.08 (d,  $J$  = 16.0 Hz, 1H), 7.53 (d,  $J$  = 15.7 Hz, 1H), 7.39 – 7.30 (m, 1H), 7.20 (d,  $J$  = 1.4 Hz, 1H), 7.04 (s, 1H), 6.99 (d,  $J$  = 16.0 Hz, 1H), 6.62 (d,  $J$  = 15.7 Hz, 1H), 6.14 (s, 2H), 3.93 (s, 3H), 3.89 (s, 6H), 3.84 (s, 2H), 2.65 (s, 2H), 2.48 (s, 6H).  $^{13}C$  NMR (151 MHz,  $CD_3OD$ )  $\delta$  190.52, 162.00, 161.80, 150.42, 148.45, 139.76, 132.56, 125.78, 123.30, 122.26, 121.13, 120.80, 109.84, 104.80, 91.66, 59.54, 55.11, 54.78, 42.83. HRMS(ESI)  $m/z$ : calcd for  $C_{25}H_{30}NO_7^+$   $[M+H]^+$ : 456.2022, found: 456.2016. Yield: 20.9%.

(1E,6E)-1-(3-((dimethylamino)methyl)-4-hydroxy-5-methoxyphenyl)-7-(4-hydroxy-3-methoxyphenyl)hepta-1,6-diene-3,5-dione (**15**)  $^1H$  NMR (600 MHz, DMSO- $d_6$ )  $\delta$  7.57 – 7.53



(m, 1H), 7.32 (s, 1H), 7.26 (d,  $J = 1.4$  Hz, 1H), 7.15 (dd,  $J = 8.2, 1.7$  Hz, 1H), 7.07 (s, 1H), 6.83 (d,  $J = 8.1$  Hz, 1H), 6.75 (d,  $J = 15.8$  Hz, 2H), 6.06 (s, 1H), 3.84 (d,  $J = 7.4$  Hz, 6H), 3.63 (s, 2H), 2.30 (s, 2H), 2.26 (s, 6H).  $^{13}\text{C}$  NMR (151 MHz, DMSO- $d_6$ )  $\delta$  191.18, 150.02, 149.82, 148.46, 148.32, 141.19, 141.15, 126.79, 125.75, 123.59, 123.52, 121.58, 116.17, 111.81, 111.04, 101.31, 60.12, 56.24, 56.16, 55.35, 44.36. HRMS(ESI)  $m/z$ : calcd for  $\text{C}_{24}\text{H}_{28}\text{NO}_6^+$   $[\text{M}+\text{H}]^+$ : 426.1916, found: 426.1914. Yield: 26.21%.

(1E,6E)-1-(3-((dimethylamino)methyl)-4-hydroxy-5-methoxyphenyl)-7-(3-ethoxy-4-hydroxyphenyl)hepta-1,6-diene-3,5-dione acetate (**1a**)  $^1\text{H}$  NMR (600 MHz,  $\text{CD}_3\text{OD}$ )  $\delta$  9.64 (s, 1H), 7.53 (d,  $J = 6.7$  Hz, 2H), 7.41 (d,  $J = 5.2$  Hz, 2H), 7.17 (dd,  $J = 63.4, 52.3$  Hz, 3H), 6.84 (t,  $J = 15.8$  Hz, 1H), 6.59 (d,  $J = 15.1$  Hz, 1H), 4.18 – 4.10 (m, 5H), 3.89 (s, 3H), 2.74 (s, 3H), 2.72 (s, 3H), 1.94 (s, 3H). HRMS(ESI)  $m/z$ : calcd for  $\text{C}_{25}\text{H}_{30}\text{NO}_6^+$   $[\text{M}+\text{H}]^+$ : 440.2073, found: 440.2064. Yield: 94.82%.

(1E,6E)-1-(3-((dimethylamino)methyl)-4-hydroxy-5-methoxyphenyl)-7-(4-hydroxy-3,5-dimethoxyphenyl)hepta-1,6-diene-3,5-dione acetate (**2a**)  $^1\text{H}$  NMR (600 MHz,  $\text{CD}_3\text{OD}$ )  $\delta$  7.53 (dd,  $J = 15.4, 7.0$  Hz, 2H), 7.39 (s, 1H), 7.25 (s, 1H), 7.10 (s, 1H), 6.90 (s, 2H), 6.62 (d,  $J = 15.3$  Hz, 2H), 4.10 (s, 2H), 3.93 (s, 3H), 3.88 (d,  $J = 3.7$  Hz, 6H), 2.70 (s, 6H), 1.94 (s, 3H). HRMS(ESI)  $m/z$ : calcd for  $\text{C}_{25}\text{H}_{30}\text{NO}_7^+$   $[\text{M}-\text{CH}_3\text{COOH}+\text{H}]^+$ : 456.2022, found: 456.2018. Yield: 93.87%.

(1E,6E)-1-(3-((dimethylamino)methyl)-4-hydroxy-5-methoxyphenyl)-7-(4-hydroxy-2-methylphenyl)hepta-1,6-diene-3,5-dione acetate (**3a**)  $^1\text{H}$  NMR (600 MHz,  $\text{CD}_3\text{OD}$ )  $\delta$  7.88 (d,  $J = 15.6$  Hz, 1H), 7.56 (t,  $J = 11.1$  Hz, 2H), 7.40 (s, 1H), 7.29 (s, 1H), 7.15 (s, 1H), 6.66 (d,  $J = 8.0$  Hz, 3H), 6.55 (d,  $J = 15.5$  Hz, 1H), 4.14 (s, 2H), 3.94 (s, 3H), 2.72 (s, 6H), 2.38 (s, 3H), 1.94 (s, 3H). HRMS(ESI)  $m/z$ : calcd for  $\text{C}_{24}\text{H}_{28}\text{NO}_5^+$   $[\text{M}-\text{CH}_3\text{COOH}+\text{H}]^+$ : 410.1967, found: 410.1964. Yield: 86.21%.

(1E,6E)-1-(3-((dimethylamino)methyl)-4-hydroxy-5-methoxyphenyl)-7-(2-fluoro-4-hydroxyphenyl)hepta-1,6-diene-3,5-dione acetate (**4a**)  $^1\text{H}$  NMR (600 MHz,  $\text{CD}_3\text{OD}$ )  $\delta$  7.65 (d,  $J = 15.8$  Hz, 1H), 7.58 – 7.49 (m, 2H), 7.28 (s, 1H), 7.17 (s, 1H), 6.65 (d,  $J = 7.8$  Hz, 3H), 6.60 –

6.52 (m, 1H), 4.93 – 4.91 (m, 2H), 4.19 (s, 2H), 3.94 (s, 3H), 2.77 (s, 6H), 1.95 (s, 3H). HRMS(ESI) m/z: calcd for  $C_{23}H_{25}FNO_5^+$  [M-CH<sub>3</sub>COOH+H]<sup>+</sup>: 414.1716, found: 414.1713. Yield: 92.53%.

(1E,6E)-1-(3,4-dimethoxyphenyl)-7-(3-((dimethylamino)methyl)-4-hydroxy-5-methoxyphenyl)hepta-1,6-diene-3,5-dione acetate (**5a**) <sup>1</sup>H NMR (600 MHz, CD<sub>3</sub>OD) δ 9.68 (s, 1H), 7.54 (s, 1H), 7.45 (d, *J* = 13.9 Hz, 1H), 7.35 – 7.03 (m, 3H), 6.94 (d, *J* = 6.8 Hz, 1H), 6.65 (s, 1H), 4.21 (s, 2H), 4.03 – 3.74 (m, 9H), 2.78 (s, 2H), 2.75 (s, 6H), 1.95 (s, 3H). HRMS(ESI) m/z: calcd for  $C_{25}H_{30}NO_6^+$  [M-CH<sub>3</sub>COOH+H]<sup>+</sup>: 440.2073, found: 440.2069. Yield: 91.34%.

(1E,6E)-1-(3-((dimethylamino)methyl)-4-hydroxy-5-methoxyphenyl)-7-(2,3,4-trimethoxyphenyl)hepta-1,6-diene-3,5-dione acetate (**6a**) <sup>1</sup>H NMR (600 MHz, CD<sub>3</sub>OD) δ 7.80 (d, *J* = 15.6 Hz, 1H), 7.54 (d, *J* = 14.8 Hz, 1H), 7.37 (s, 1H), 7.24 (s, 1H), 7.11 (s, 1H), 6.80 (d, *J* = 7.4 Hz, 1H), 6.66 (d, *J* = 19.3 Hz, 2H), 4.05 (s, 2H), 3.87 (dd, *J* = 36.0, 22.2 Hz, 12H), 2.76 – 2.52 (m, 8H), 1.93 (s, 3H). HRMS(ESI) m/z: calcd for  $C_{26}H_{32}NO_7^+$  [M-CH<sub>3</sub>COOH+H]<sup>+</sup>: 470.2178, found: 470.2174. Yield: 89.90%.

(1E,6E)-1-(3-chloro-4-hydroxyphenyl)-7-(3-((dimethylamino)methyl)-4-hydroxy-5-methoxyphenyl)hepta-1,6-diene-3,5-dione acetate (**7a**) <sup>1</sup>H NMR (600 MHz, CD<sub>3</sub>OD) δ 9.67 (s, 1H), 7.64 – 7.28 (m, 5H), 7.17 (s, 1H), 6.93 (d, *J* = 8.0 Hz, 1H), 6.78 – 6.51 (m, 2H), 4.19 (d, *J* = 8.8 Hz, 2H), 3.95 (s, 3H), 3.91 (s, 2H), 2.75 (d, *J* = 16.8 Hz, 6H), 1.95 (s, 3H). HRMS(ESI) m/z: calcd for  $C_{23}H_{25}ClNO_5^+$  [M-CH<sub>3</sub>COOH+H]<sup>+</sup>: 430.1421, found: 430.1415. Yield: 94.21%.

(1E,6E)-1-(3-((dimethylamino)methyl)-4-hydroxy-5-methoxyphenyl)-7-(4-hydroxy-3,5-dimethylphenyl)hepta-1,6-diene-3,5-dione acetate (**8a**) <sup>1</sup>H NMR (600 MHz, CD<sub>3</sub>OD) δ 7.51 (t, *J* = 16.8 Hz, 2H), 7.27 (s, 1H), 7.20 (s, 2H), 7.16 (s, 1H), 6.60 (dd, *J* = 57.3, 15.2 Hz, 2H), 4.18 (s, 2H), 3.93 (s, 3H), 2.74 (d, *J* = 14.2 Hz, 8H), 2.22 (s, 6H), 1.95 (s, 3H). HRMS(ESI) m/z: calcd for  $C_{25}H_{30}NO_5^+$  [M-CH<sub>3</sub>COOH+H]<sup>+</sup>: 424.2118, found: 424.2120. Yield: 26.21%.

(1E,6E)-1-(3-((dimethylamino)methyl)-4-hydroxy-5-methoxyphenyl)-7-(4-hydroxy-2-methoxyphenyl)hepta-1,6-diene-3,5-dione acetate (**9a**) <sup>1</sup>H NMR (600 MHz, CD<sub>3</sub>OD) δ 7.86 (d, *J* = 15.8 Hz, 1H), 7.50 (d, *J* = 15.5 Hz, 1H), 7.44 (d, *J* = 8.4 Hz, 1H), 7.26 (s, 1H), 7.15 (s, 1H), 6.61

(d,  $J = 15.3$  Hz, 2H), 6.43 (dd,  $J = 11.5, 5.1$  Hz, 2H), 4.19 (s, 2H), 3.93 (s, 3H), 3.85 (s, 3H), 2.80 – 2.73 (m, 8H), 1.95 (s, 3H). HRMS(ESI)  $m/z$ : calcd for  $C_{24}H_{28}NO_6^+$   $[M-CH_3COOH+H]^+$ : 426.1916, found: 426.1912. Yield: 95.10%.

(1E,6E)-1-(3-((dimethylamino)methyl)-4-hydroxy-5-methoxyphenyl)-7-(4-hydroxyphenyl)hepta-1,6-diene-3,5-dione acetate (**10a**)  $^1H$  NMR (600 MHz,  $CD_3OD$ )  $\delta$  7.53 (dd,  $J = 15.3, 9.9$  Hz, 2H), 7.46 (dd,  $J = 10.5, 5.2$  Hz, 2H), 7.27 (s, 1H), 7.17 (s, 1H), 6.81 (d,  $J = 8.3$  Hz, 2H), 6.60 (dd,  $J = 50.0, 15.2$  Hz, 2H), 4.21 (d,  $J = 3.3$  Hz, 2H), 3.93 (s, 3H), 2.76 (d,  $J = 13.3$  Hz, 8H), 1.96 (s, 3H). HRMS(ESI)  $m/z$ : calcd for  $C_{23}H_{26}NO_5^+$   $[M-CH_3COOH+H]^+$ : 396.1811, found: 396.1808. Yield: 96.62%.

(1E,6E)-1-(3-((dimethylamino)methyl)-4-hydroxy-5-methoxyphenyl)-7-(3-hydroxy-4-methoxyphenyl)hepta-1,6-diene-3,5-dione acetate (**11a**)  $^1H$  NMR (600 MHz,  $CD_3OD$ )  $\delta$  7.48 (dd,  $J = 26.3, 15.7$  Hz, 2H), 7.24 (s, 1H), 7.16 (s, 1H), 7.06 (s, 1H), 7.01 (d,  $J = 7.7$  Hz, 1H), 6.88 (d,  $J = 8.2$  Hz, 1H), 6.61 (d,  $J = 15.5$  Hz, 1H), 6.50 (d,  $J = 15.7$  Hz, 1H), 4.21 (d,  $J = 12.9$  Hz, 2H), 3.92 (s, 2H), 3.85 (s, 3H), 2.78 (s, 6H), 1.96 (s, 3H). HRMS(ESI)  $m/z$ : calcd for  $C_{24}H_{28}NO_6^+$   $[M-CH_3COOH+H]^+$ : 426.1916, found: 426.1913. Yield: 98.26%.

(1E,6E)-1-(3-((dimethylamino)methyl)-4-hydroxy-5-methoxyphenyl)-7-(4-hydroxy-2,5-dimethylphenyl)hepta-1,6-diene-3,5-dione acetate (**12a**)  $^1H$  NMR (600 MHz,  $DMSO-d_6$ )  $\delta$  9.81 (s, 1H), 7.78 (d,  $J = 9.5$  Hz, 1H), 7.60 – 7.40 (m, 4H), 6.86 (d,  $J = 15.6$  Hz, 1H), 6.80 – 6.61 (m, 2H), 4.32 (s, 2H), 3.93 (d,  $J = 5.3$  Hz, 3H), 2.72 (s, 6H), 2.51 (s, 3H), 2.32 (s, 2H), 2.12 (s, 3H). HRMS(ESI)  $m/z$ : calcd for  $C_{25}H_{30}NO_5^+$   $[M-CH_3COOH+H]^+$ : 424.2124, found: 424.2118. Yield: 89.67%.

(1E,6E)-1-(3-((dimethylamino)methyl)-4-hydroxy-5-methoxyphenyl)-7-(4-hydroxy-2,6-dimethylphenyl)hepta-1,6-diene-3,5-dione acetate (**13a**)  $^1H$  NMR (600 MHz,  $CD_3OD$ )  $\delta$  9.69 (s, 1H), 7.80 (d,  $J = 16.1$  Hz, 1H), 7.47 (dd,  $J = 27.8, 1.5$  Hz, 3H), 7.25 (d,  $J = 51.8$  Hz, 1H), 6.76 – 6.38 (m, 2H), 6.28 (d,  $J = 16.1$  Hz, 1H), 4.24 (s, 2H), 3.91 (s, 3H), 2.80 (s, 2H), 2.78 (s, 6H), 2.32 (s, 3H), 1.95 (s, 6H). HRMS(ESI)  $m/z$ : calcd for  $C_{25}H_{30}NO_5^+$   $[M-CH_3COOH+H]^+$ : 424.2124, found: 424.2120. Yield: 97.65%.

(1E,6E)-1-(3-((dimethylamino)methyl)-4-hydroxy-5-methoxyphenyl)-7-(4-hydroxy-2,6-dimethoxyphenyl)hepta-1,6-diene-3,5-dione acetate (**14a**)  $^1\text{H}$  NMR (600 MHz,  $\text{CD}_3\text{OD}$ )  $\delta$  8.04 (d,  $J$  = 15.9 Hz, 1H), 7.51 – 7.45 (m, 1H), 7.27 (s, 1H), 7.15 (s, 1H), 6.95 (d,  $J$  = 15.9 Hz, 1H), 6.63 (d,  $J$  = 15.2 Hz, 1H), 6.11 (s, 2H), 4.21 (d,  $J$  = 3.2 Hz, 2H), 3.94 (s, 3H), 3.83 (d,  $J$  = 24.1 Hz, 6H), 2.77 (d,  $J$  = 18.8 Hz, 8H), 1.96 (s, 3H). HRMS(ESI)  $m/z$ : calcd for  $\text{C}_{25}\text{H}_{30}\text{NO}_7^+$  [ $\text{M}-\text{CH}_3\text{COOH}+\text{H}$ ] $^+$ : 456.2022, found: 456.2018. Yield: 96.21%.

(1E,6E)-1-(3-((dimethylamino)methyl)-4-hydroxy-5-methoxyphenyl)-7-(4-hydroxy-3-methoxyphenyl)hepta-1,6-diene-3,5-dione acetate (**15a**)  $^1\text{H}$  NMR (600 MHz,  $\text{CD}_3\text{OD}$ )  $\delta$  7.56 – 7.43 (m, 2H), 7.22 (s, 1H), 7.13 (s, 2H), 7.04 (d,  $J$  = 5.6 Hz, 1H), 6.80 (d,  $J$  = 7.8 Hz, 1H), 6.57 (t,  $J$  = 16.9 Hz, 2H), 4.18 (s, 2H), 3.88 (d,  $J$  = 13.5 Hz, 6H), 2.76 (d,  $J$  = 11.0 Hz, 6H), 1.96 (s, 3H). HRMS(ESI)  $m/z$ : calcd for  $\text{C}_{24}\text{H}_{28}\text{NO}_6^+$  [ $\text{M}-\text{CH}_3\text{COOH}+\text{H}$ ] $^+$ : 426.1916, found: 426.1912. Yield: 96.53%.

### Section 3: NMR spectrums and HRMS of curcumin derivatives **1-15** and their acetates **1a-15a**.

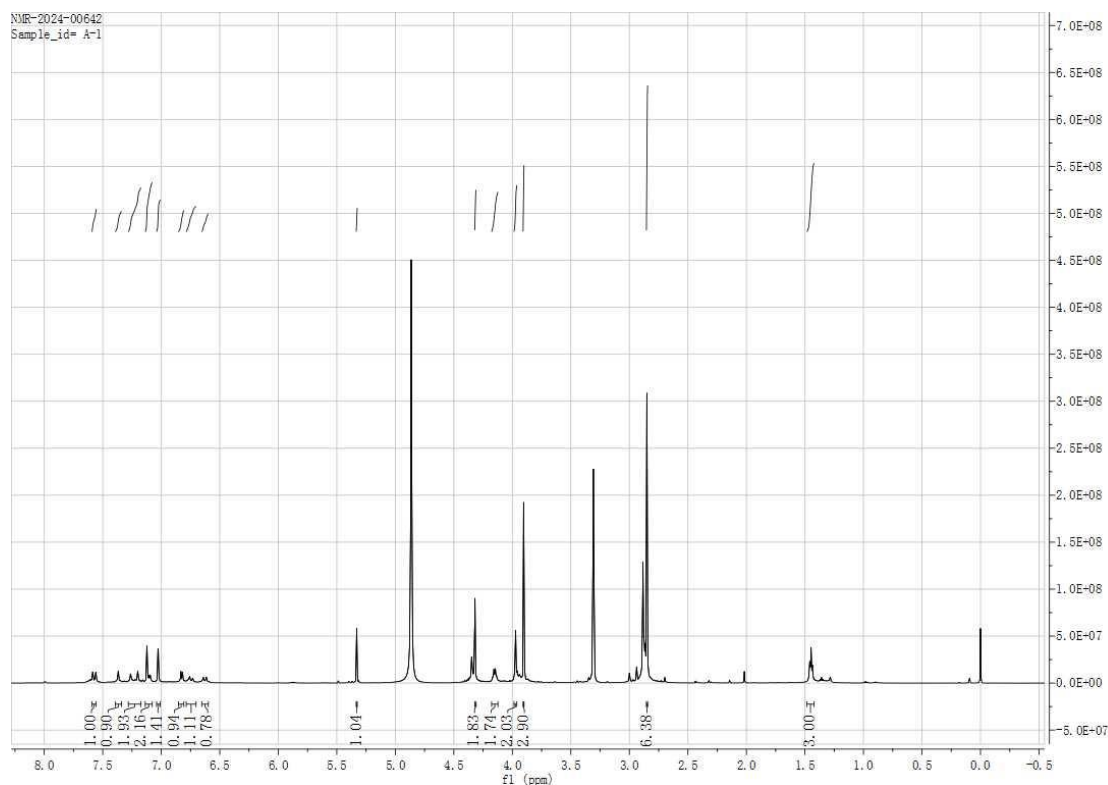

Supplementary Figure S1.  $^1\text{H}$ -NMR spectrum of **1** in  $\text{CD}_3\text{OD}$ .

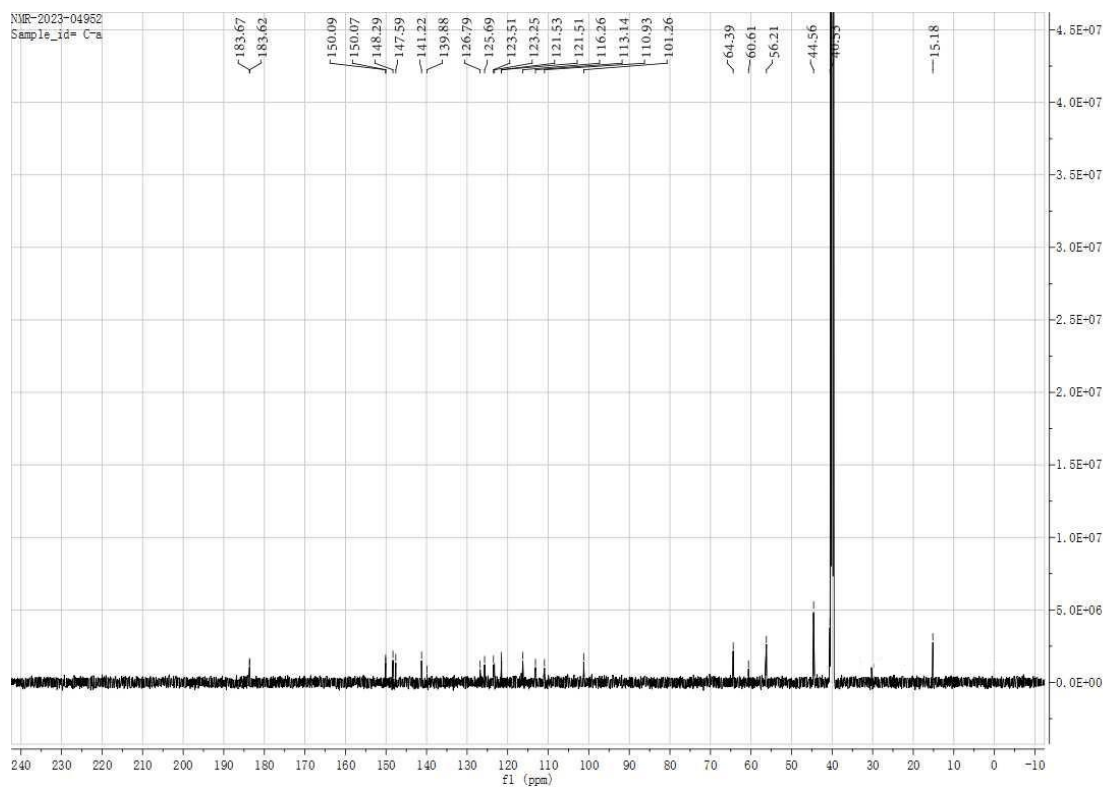

Supplementary Figure S2.  $^{13}\text{C}$ -NMR spectrum of **1** in  $\text{DMSO-}d_6$ .

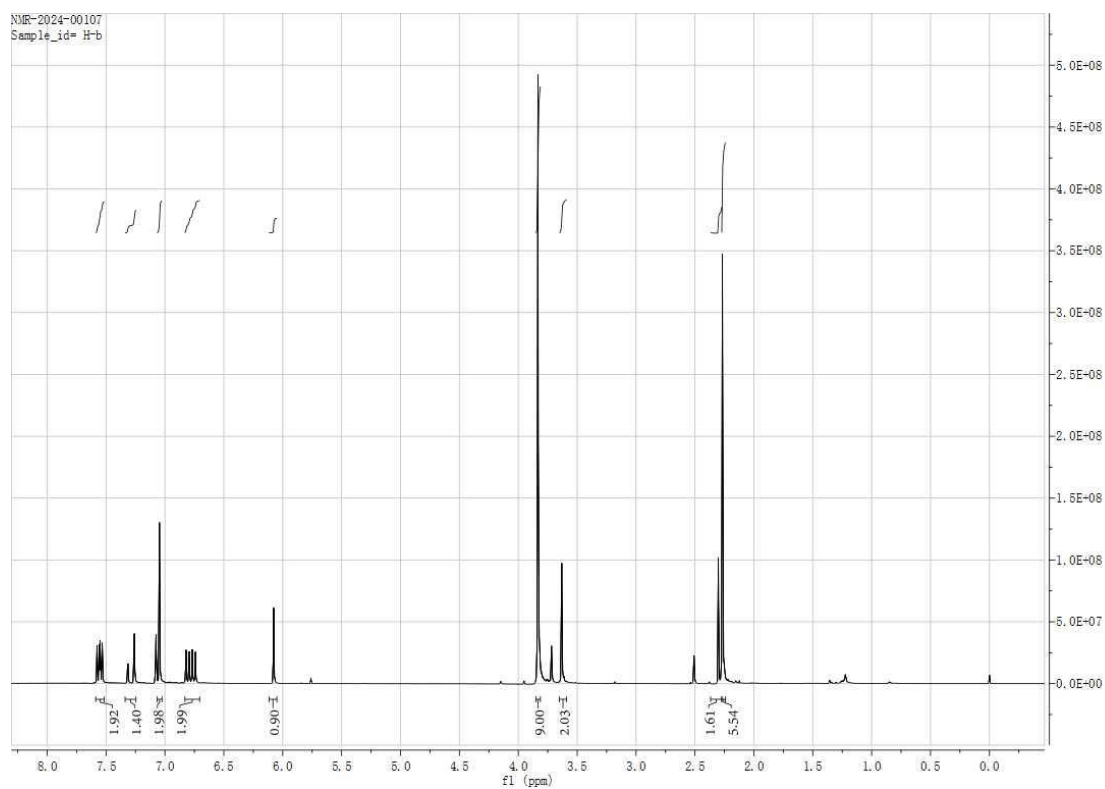

Supplementary Figure S3.  $^1\text{H}$ -NMR spectrum of **2** in  $\text{DMSO-}d_6$ .

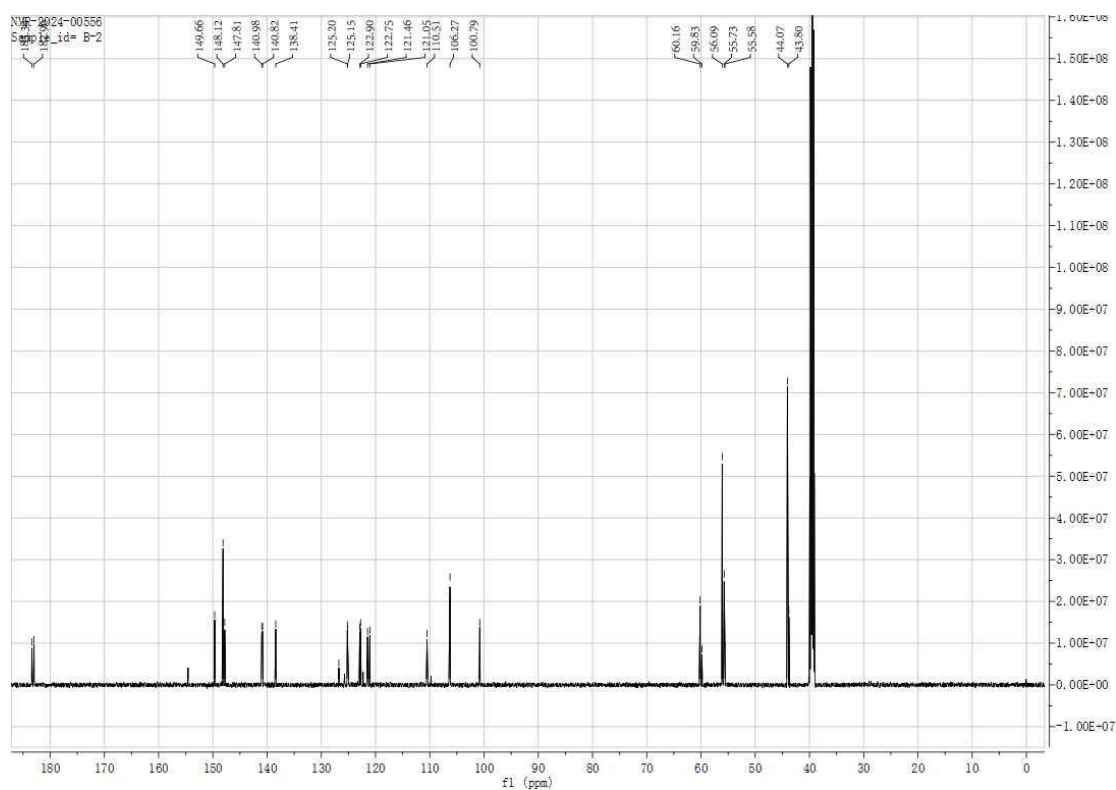

Supplementary Figure S4.  $^{13}\text{C}$ -NMR spectrum of **2** in  $\text{DMSO-}d_6$ .

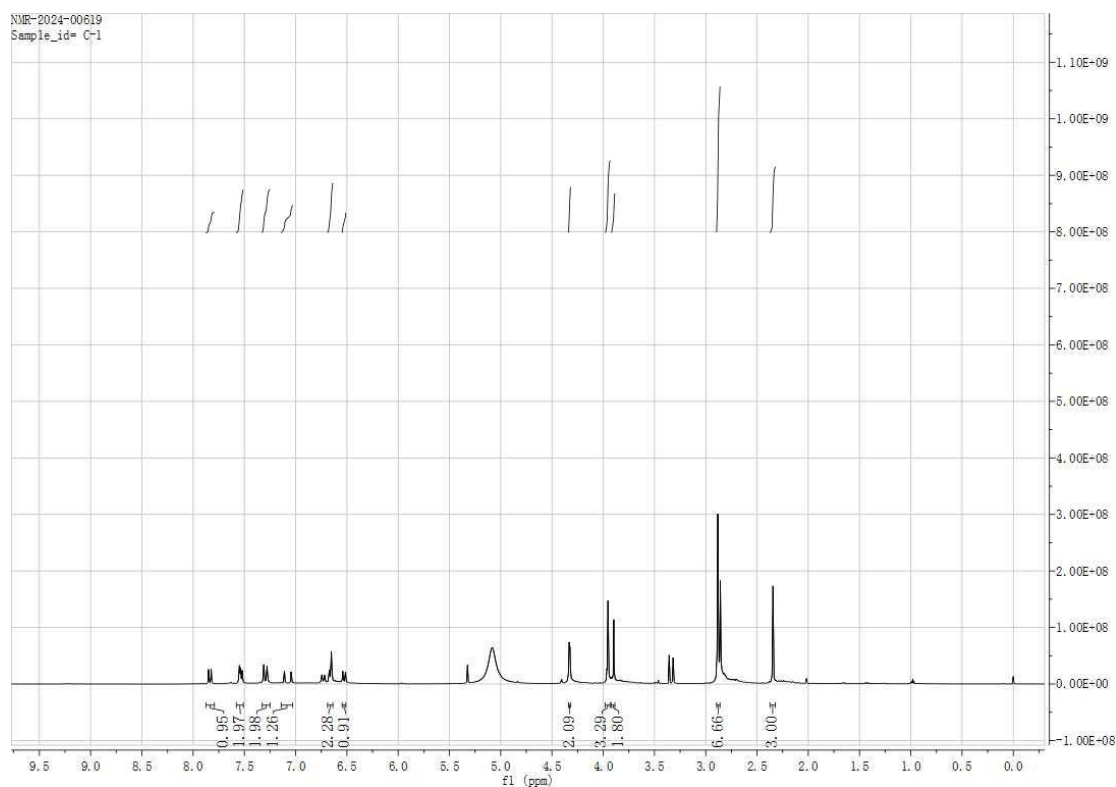

Supplementary Figure S5.  $^1\text{H}$ -NMR spectrum of **3** in  $\text{CD}_3\text{OD}$ .

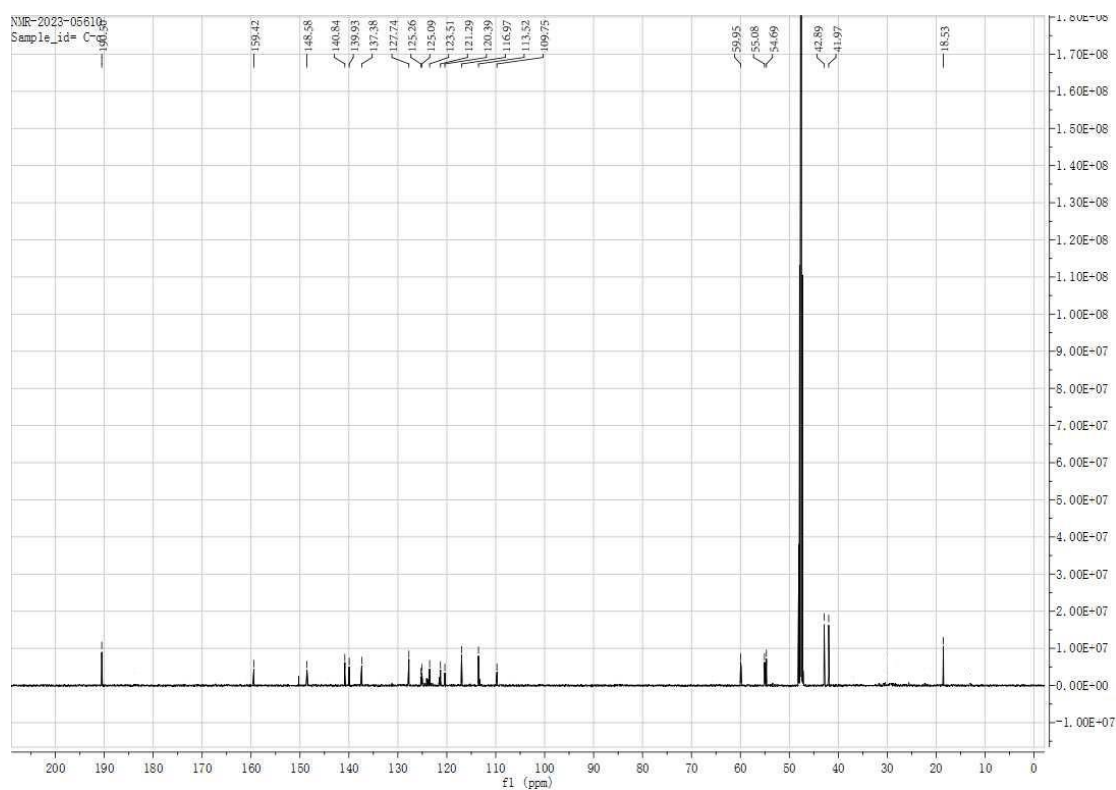

Supplementary Figure S6.  $^{13}\text{C}$ -NMR spectrum of **3** in  $\text{CD}_3\text{OD}$ .

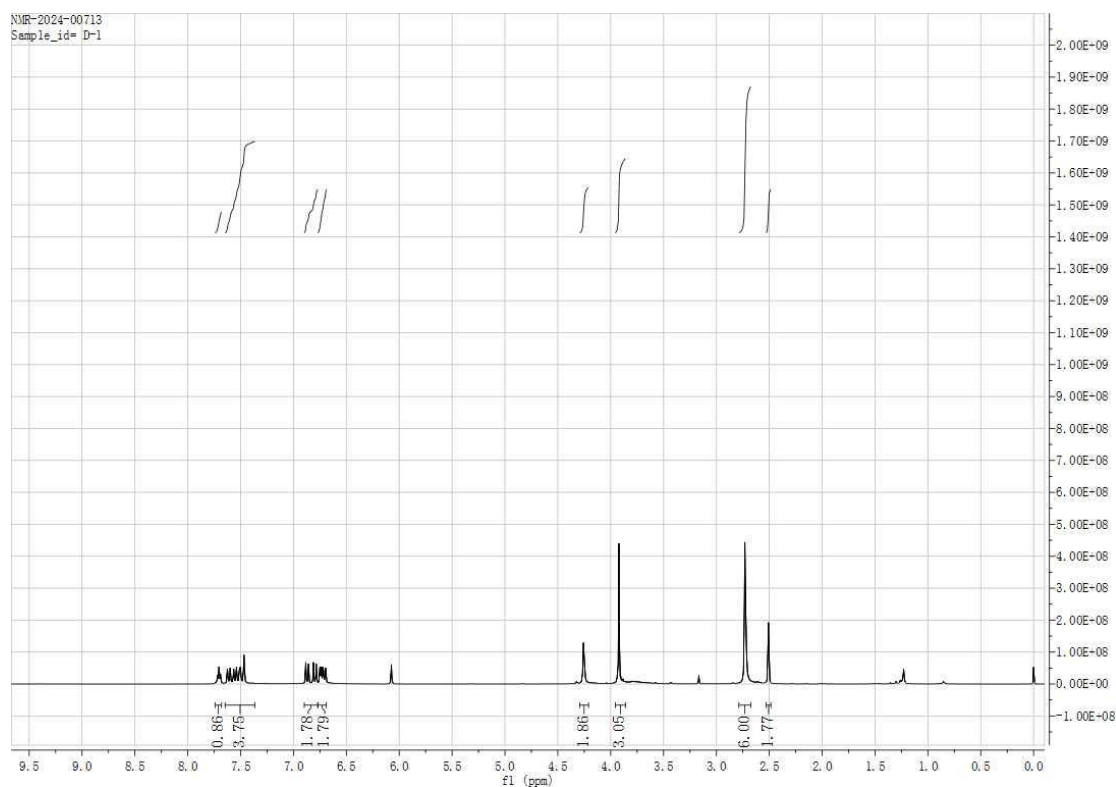

Supplementary Figure S7.  $^1\text{H}$ -NMR spectrum of **4** in  $\text{CD}_3\text{OD}$ .

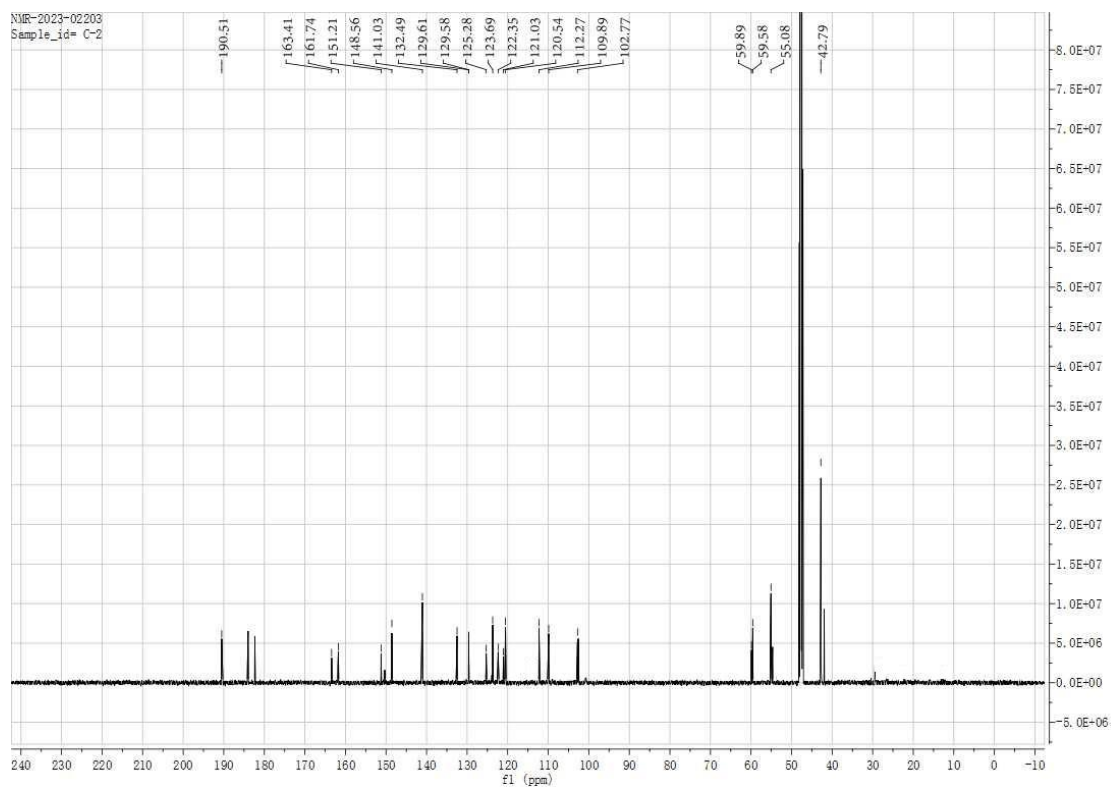

Supplementary Figure S8.  $^{13}\text{C}$ -NMR spectrum of **4** in  $\text{CD}_3\text{OD}$ .

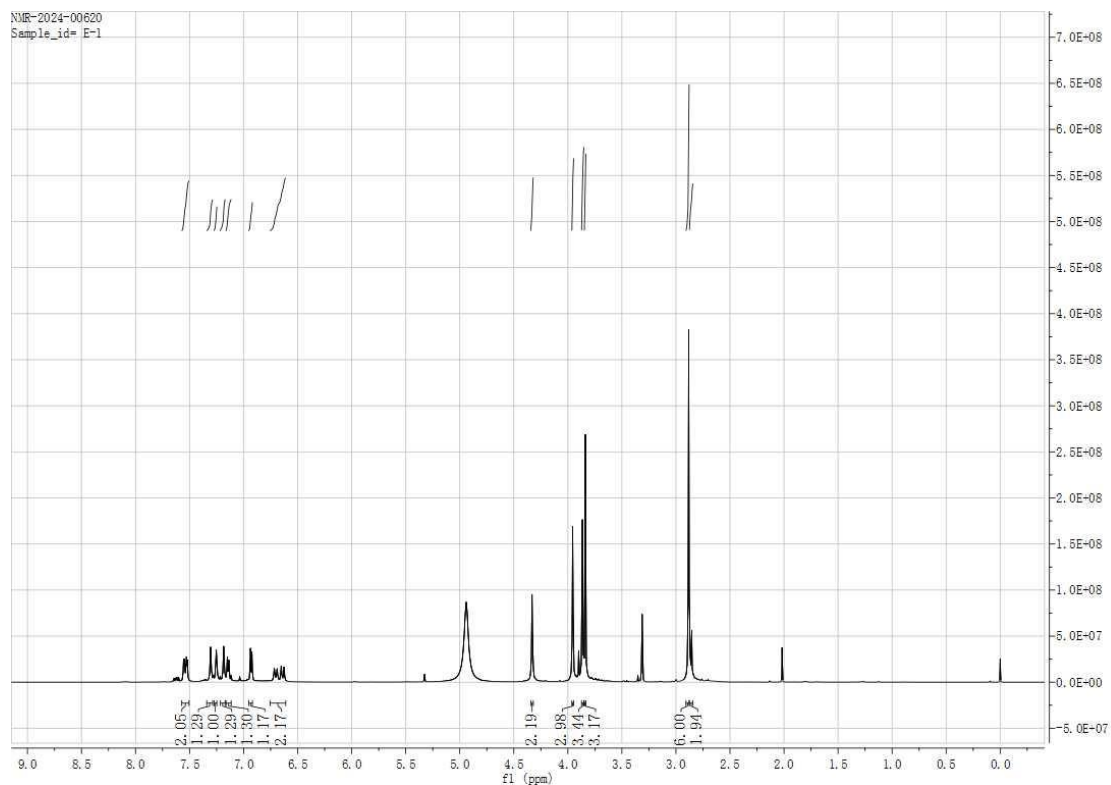

Supplementary Figure S9.  $^1\text{H}$ -NMR spectrum of **5** in  $\text{CD}_3\text{OD}$ .



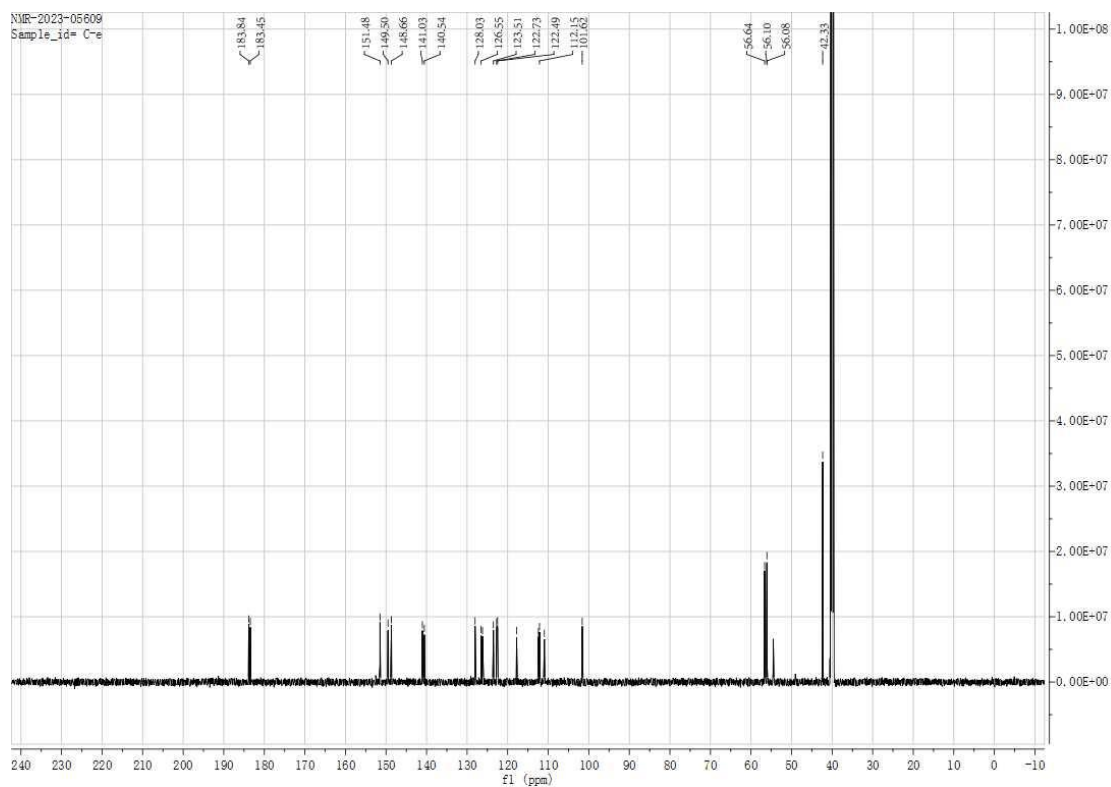

Supplementary Figure S10.  $^{13}\text{C}$ -NMR spectrum of 5 in  $\text{DMSO-}d_6$ .

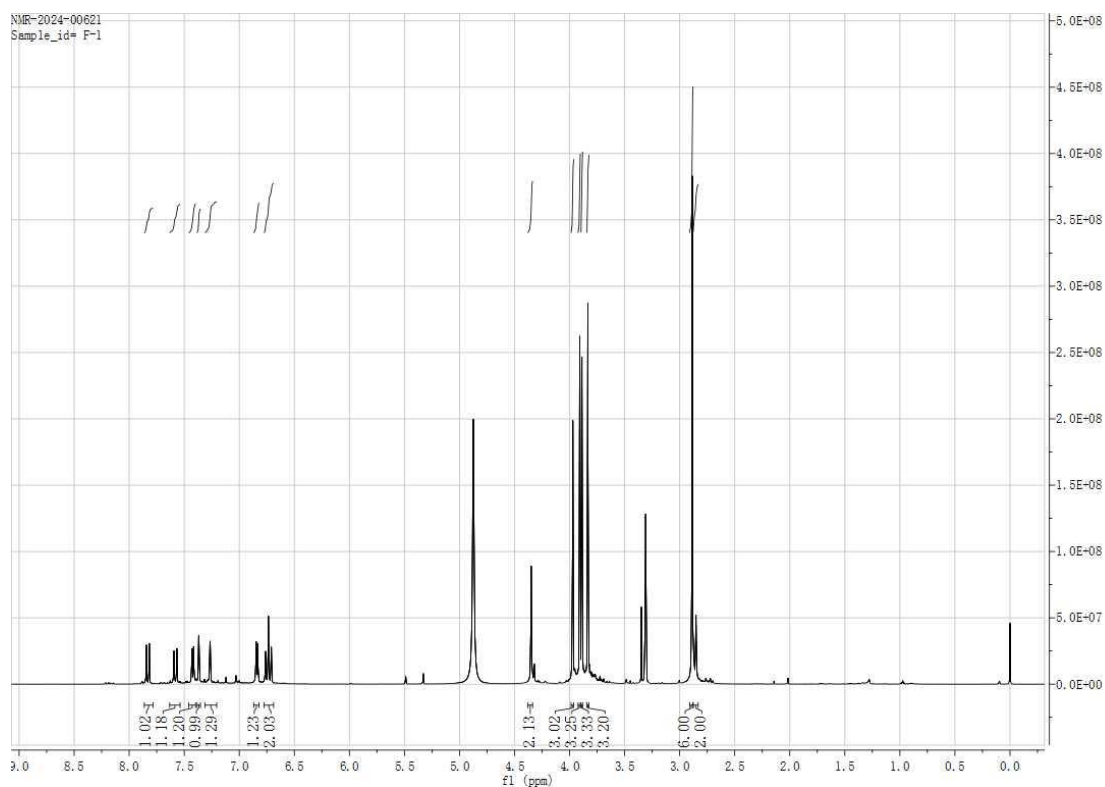

Supplementary Figure S11.  $^1\text{H}$ -NMR spectrum of 6 in  $\text{CD}_3\text{OD}$ .

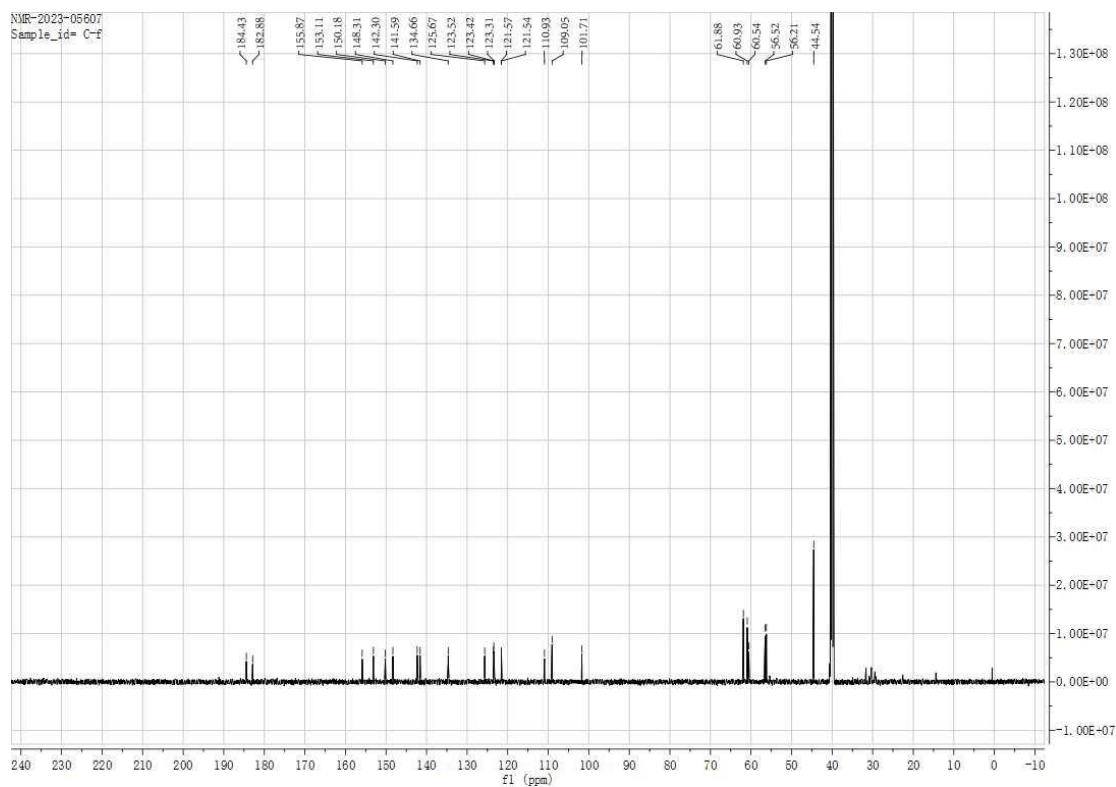

Supplementary Figure S12.  $^{13}\text{C}$ -NMR spectrum of **6** in  $\text{DMSO-}d_6$ .

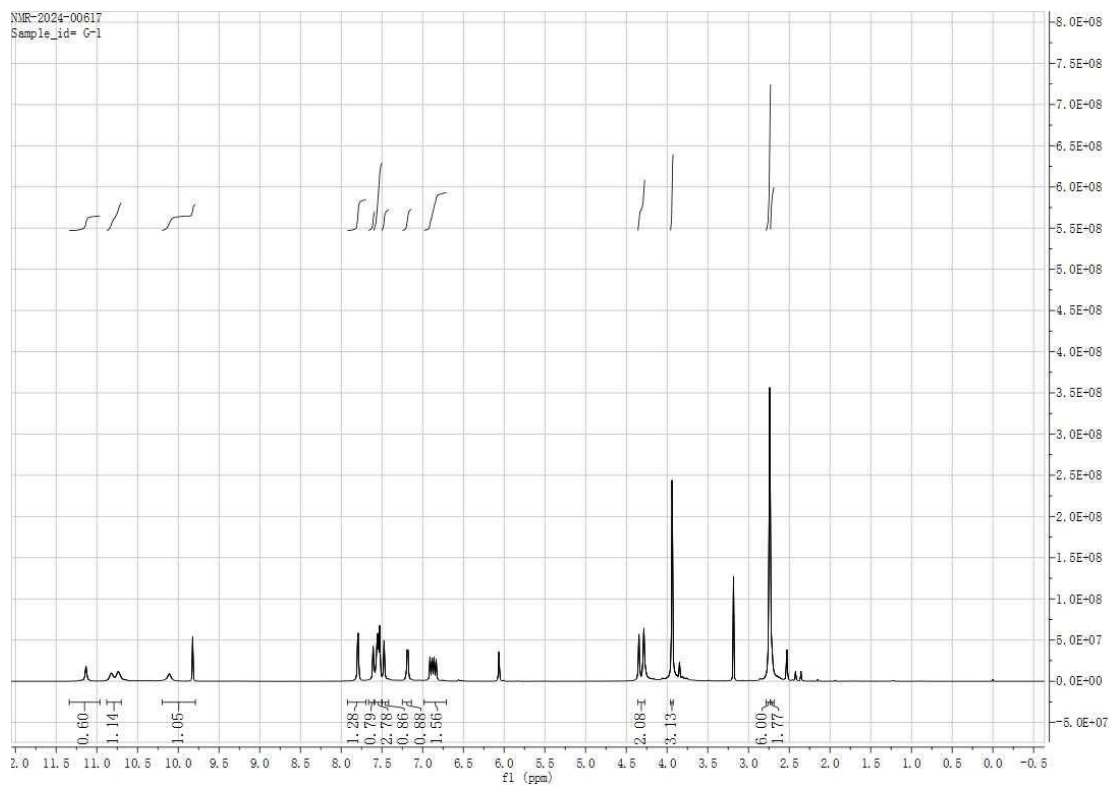

Supplementary Figure S13.  $^1\text{H}$ -NMR spectrum of **7** in  $\text{DMSO-}d_6$ .

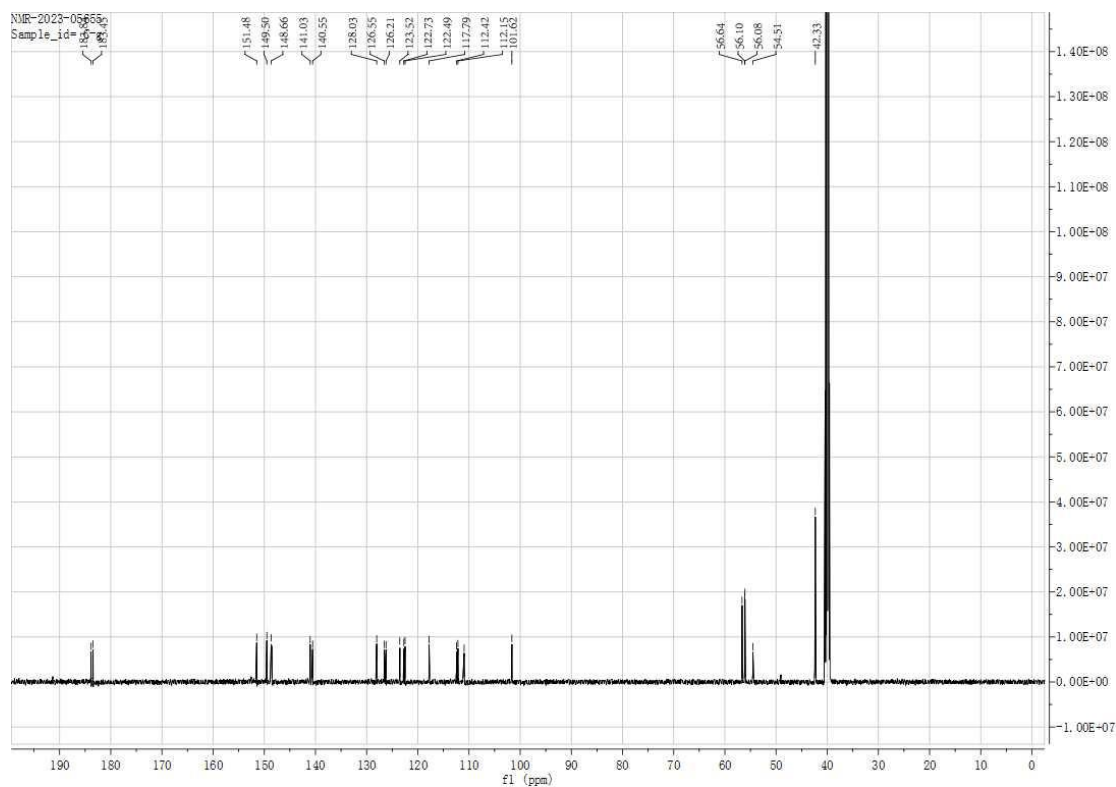

Supplementary Figure S14.  $^{13}\text{C}$ -NMR spectrum of **7** in  $\text{DMSO-}d_6$ .

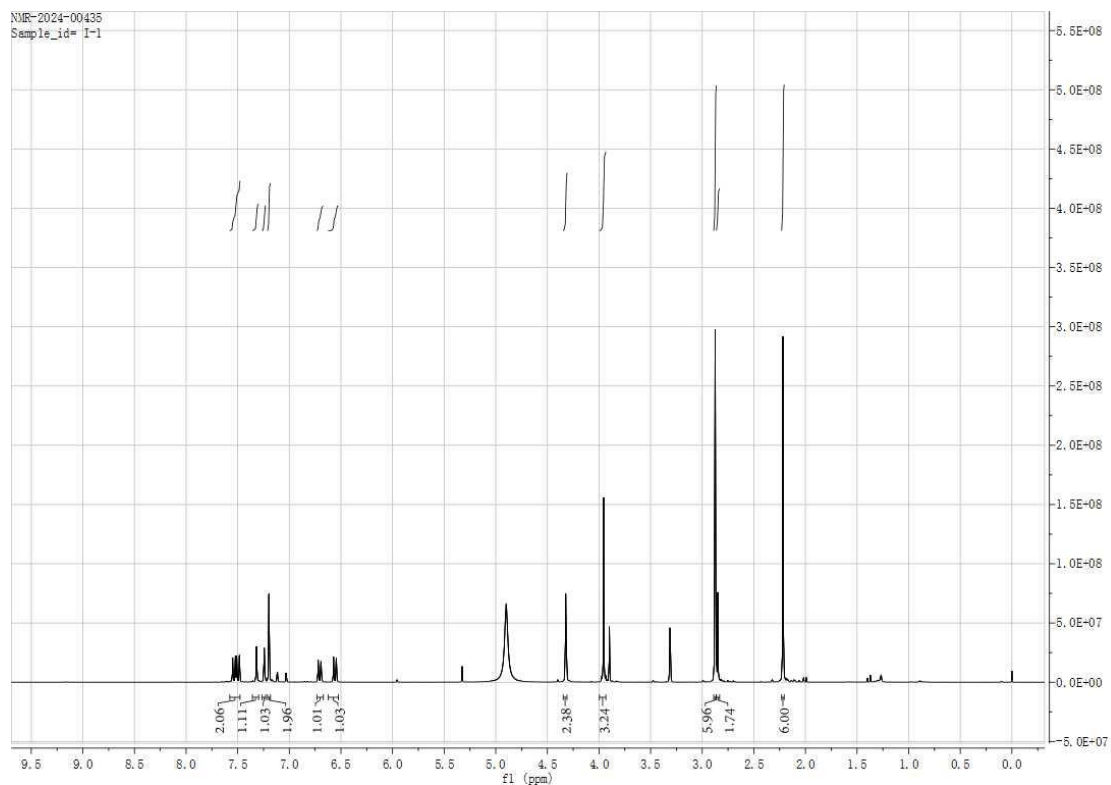

Supplementary Figure S15.  $^1\text{H}$ -NMR spectrum of **8** in  $\text{CD}_3\text{OD}$ .

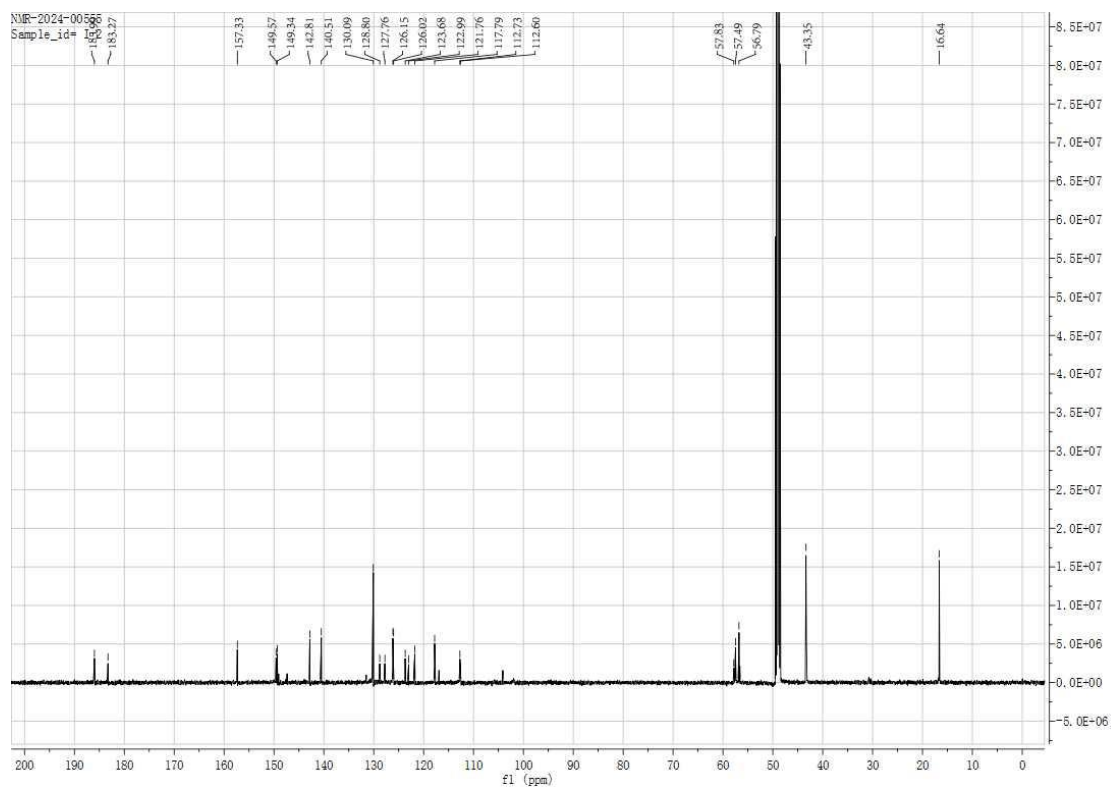

Supplementary Figure S16.  $^{13}\text{C}$ -NMR spectrum of **8** in  $\text{CD}_3\text{OD}$ .

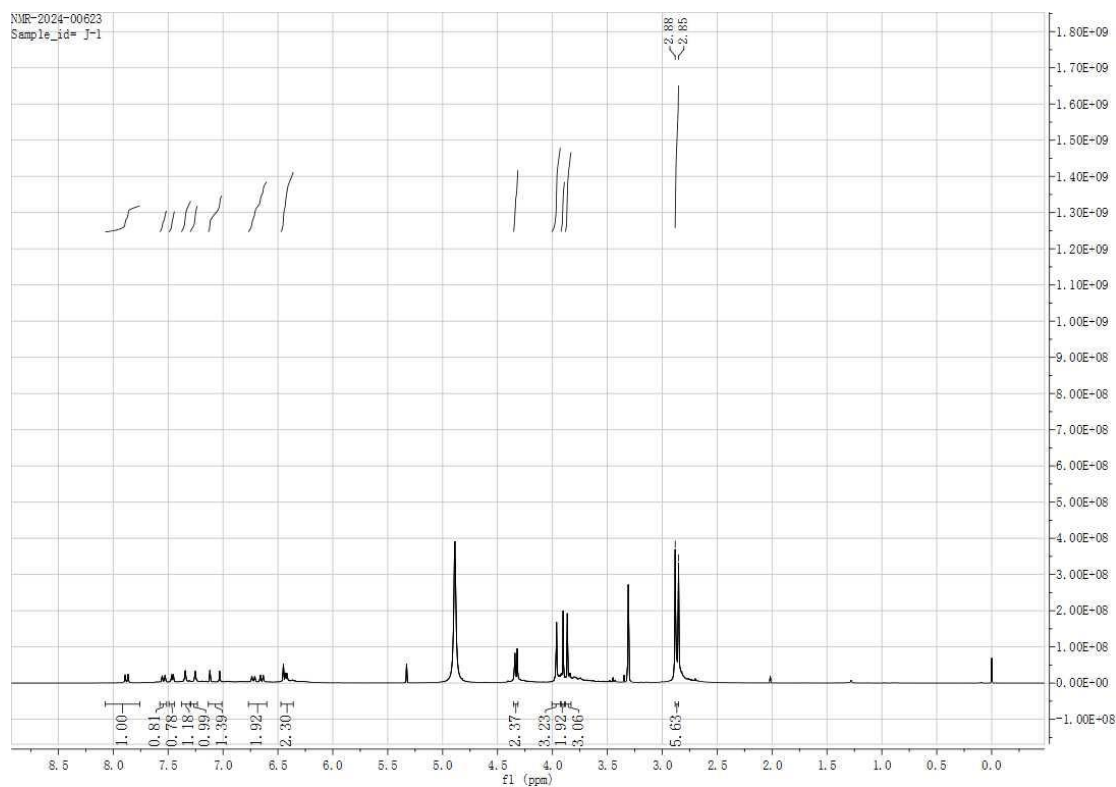

Supplementary Figure S17.  $^1\text{H}$ -NMR spectrum of **9** in  $\text{CD}_3\text{OD}$ .

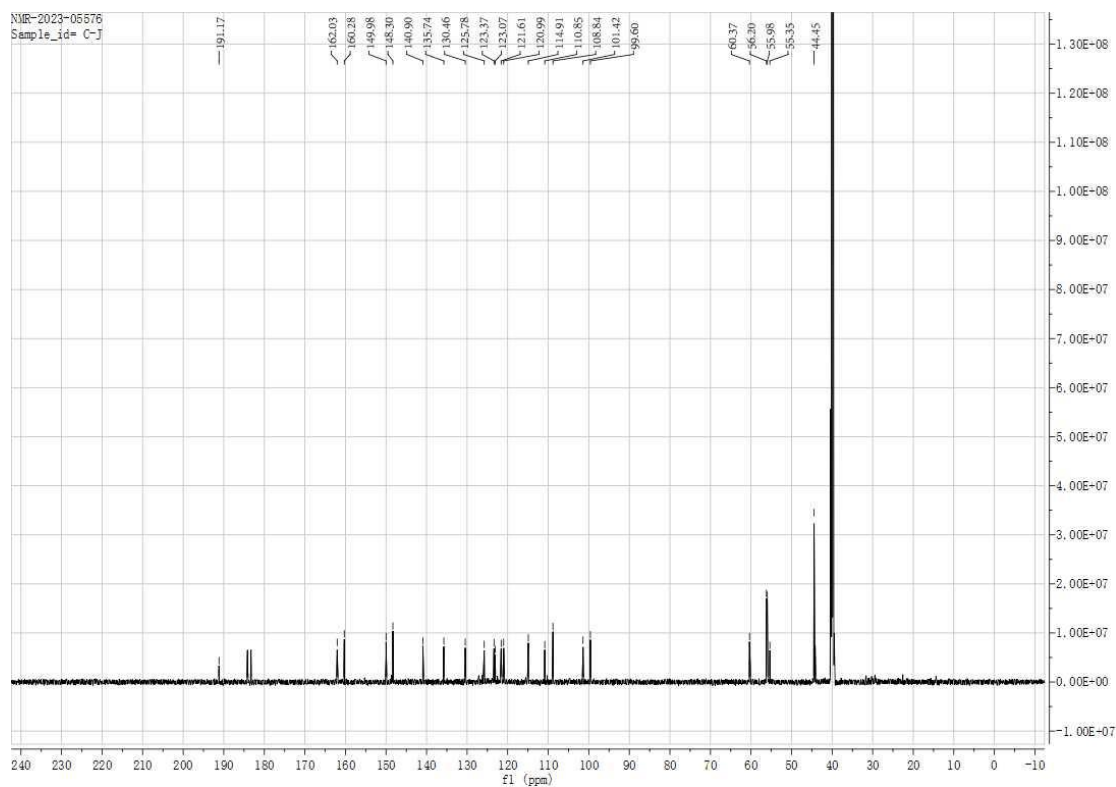

Supplementary Figure S18.  $^{13}\text{C}$ -NMR spectrum of **9** in  $\text{DMSO-}d_6$ .

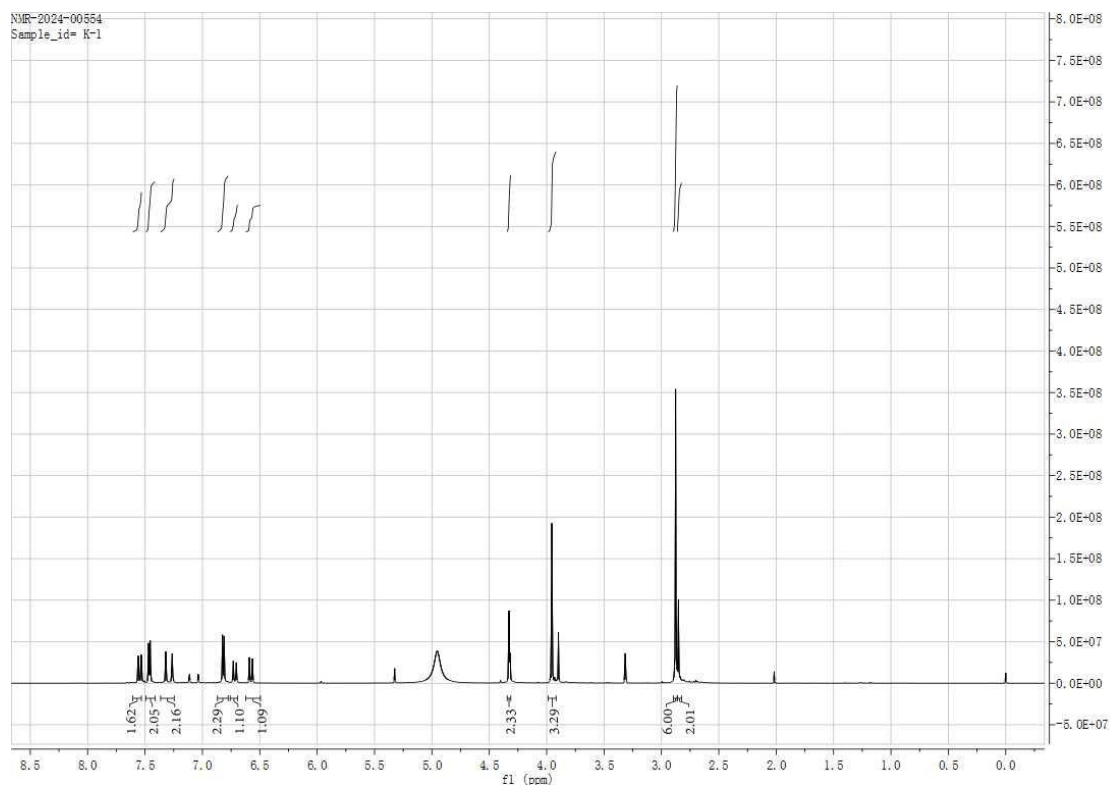

Supplementary Figure S19.  $^1\text{H}$ -NMR spectrum of **10** in  $\text{CD}_3\text{OD}$ .

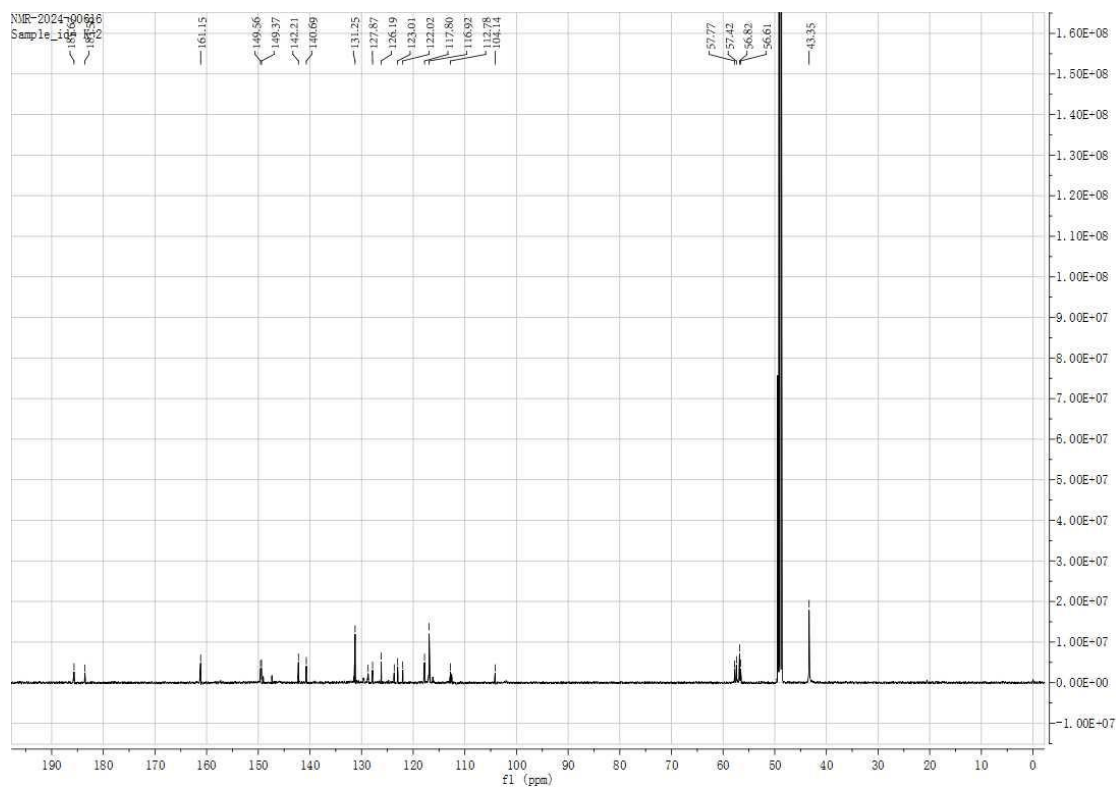

Supplementary Figure S20.  $^{13}\text{C}$ -NMR spectrum of 10 in  $\text{CD}_3\text{OD}$ .

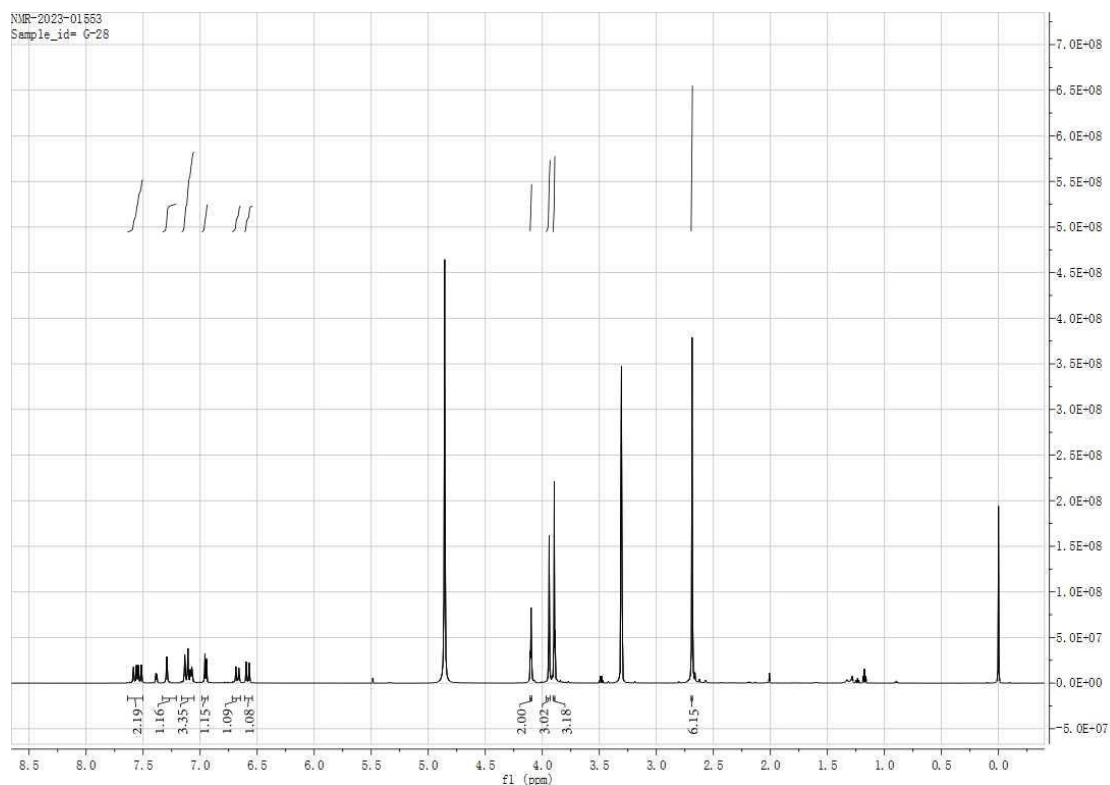

Supplementary Figure S21.  $^1\text{H}$ -NMR spectrum of 11 in  $\text{CD}_3\text{OD}$ .

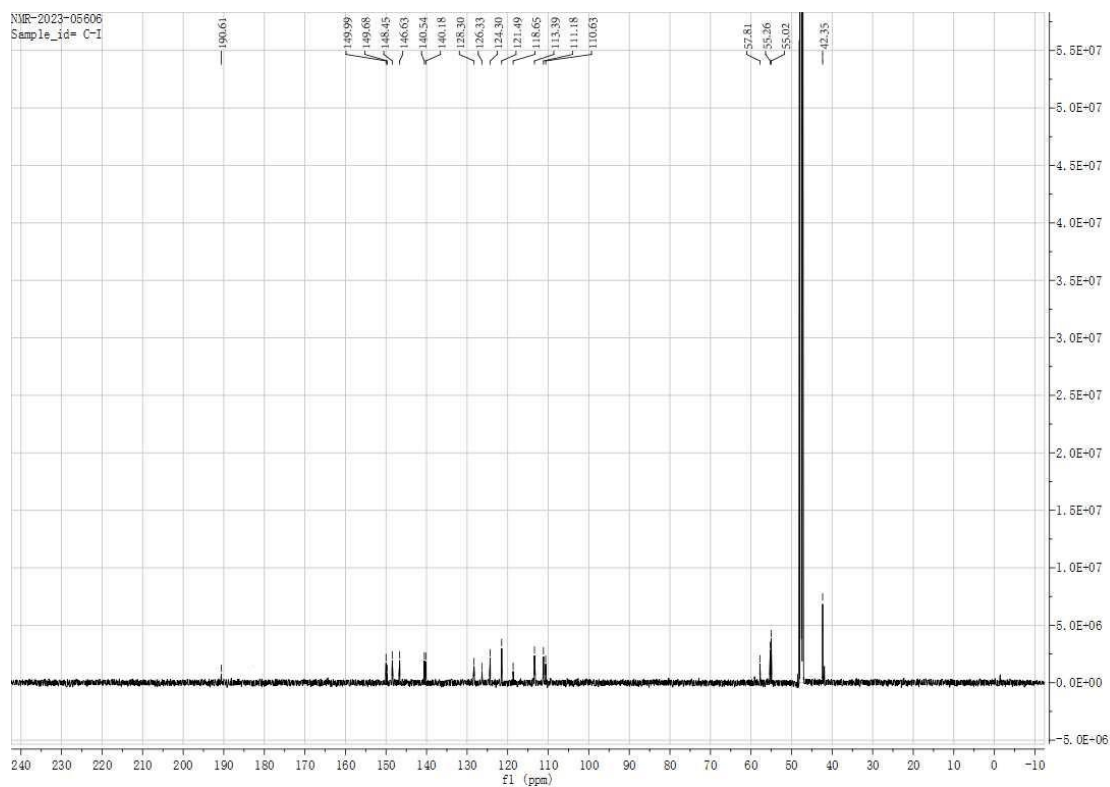

Supplementary Figure S22.  $^{13}\text{C}$ -NMR spectrum of **11** in  $\text{CD}_3\text{OD}$ .

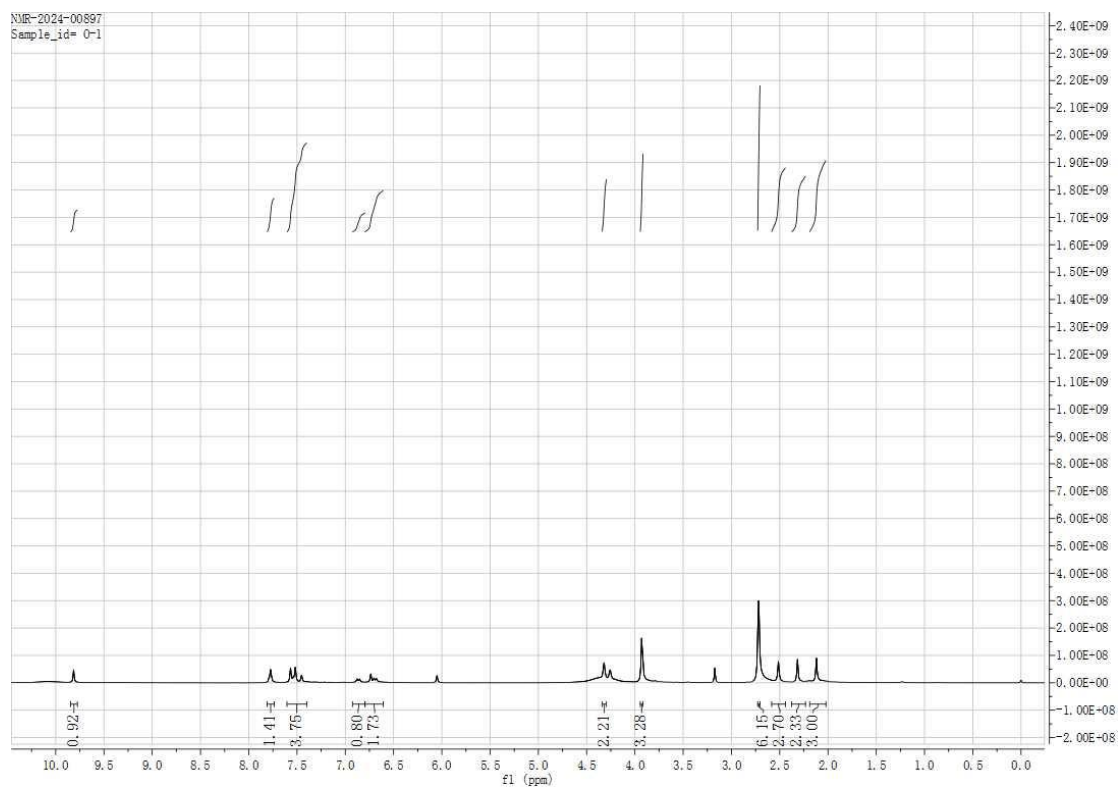

Supplementary Figure S23.  $^1\text{H}$ -NMR spectrum of **12** in  $\text{DMSO}-d_6$ .

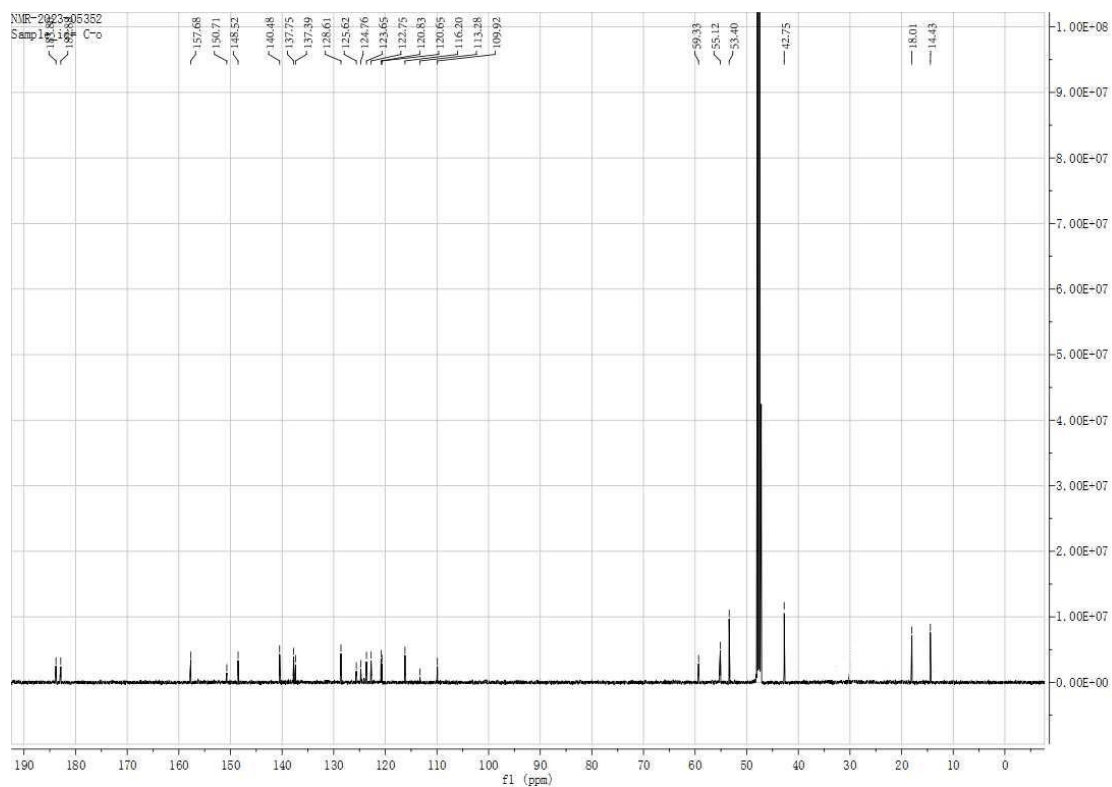

Supplementary Figure S24.  $^{13}\text{C}$ -NMR spectrum of **12** in  $\text{CD}_3\text{OD}$ .

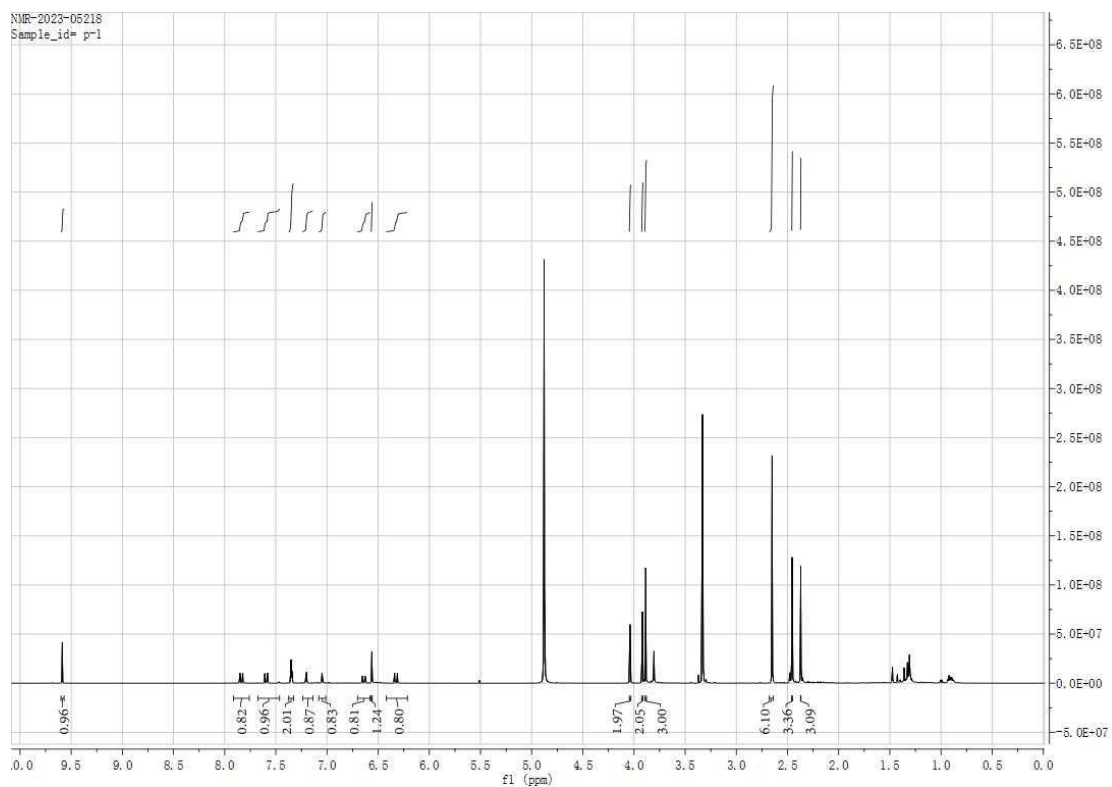

Supplementary Figure S25.  $^1\text{H}$ -NMR spectrum of **13** in  $\text{CD}_3\text{OD}$ .



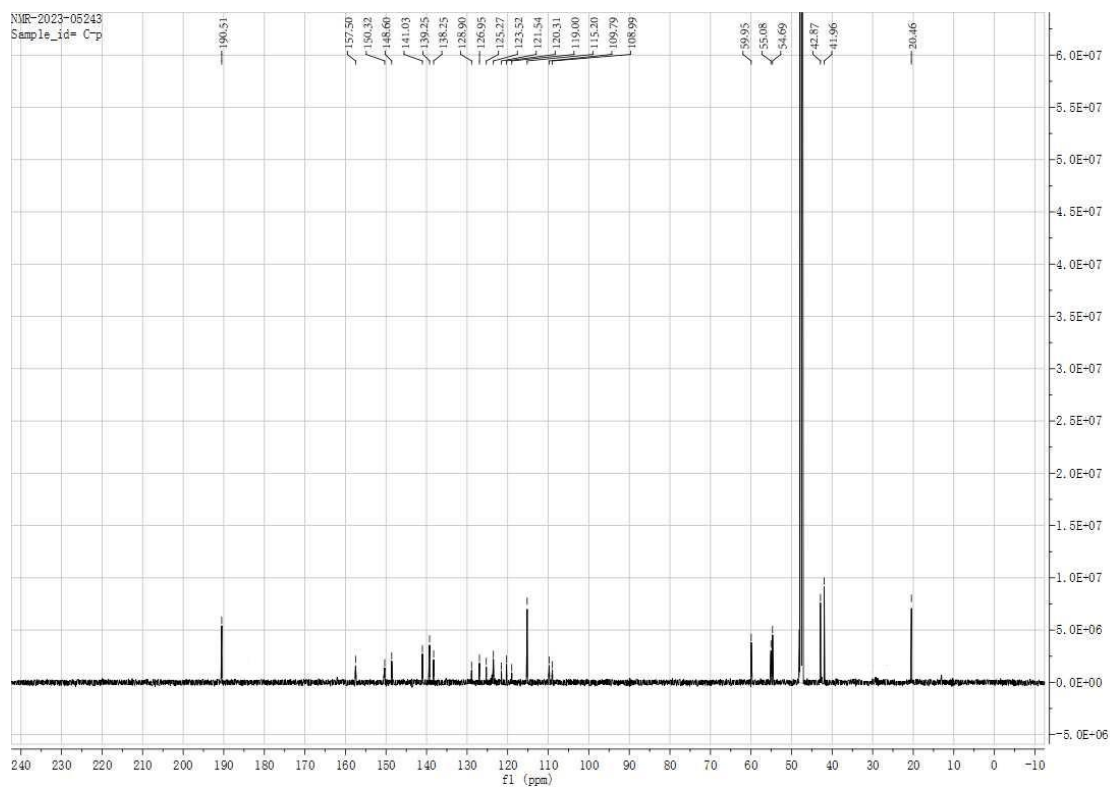

Supplementary Figure S26.  $^{13}\text{C}$ -NMR spectrum of **13** in  $\text{CD}_3\text{OD}$ .

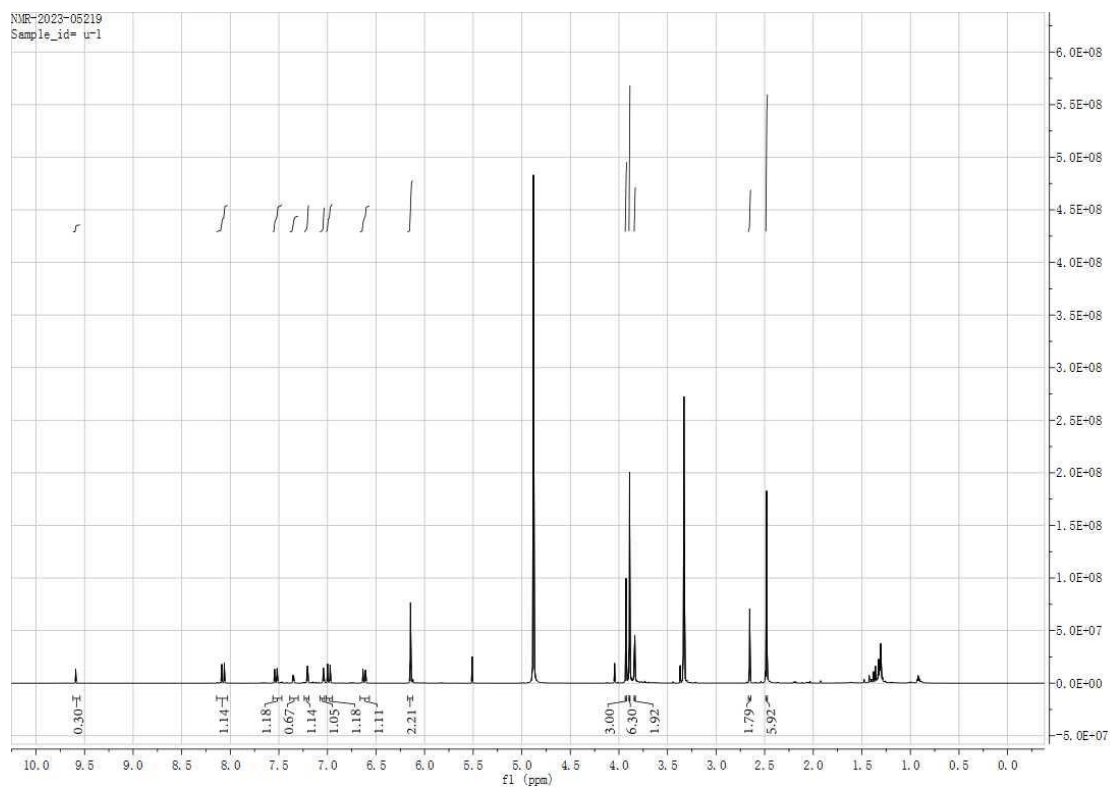

Supplementary Figure S27.  $^1\text{H}$ -NMR spectrum of **14** in  $\text{CD}_3\text{OD}$ .

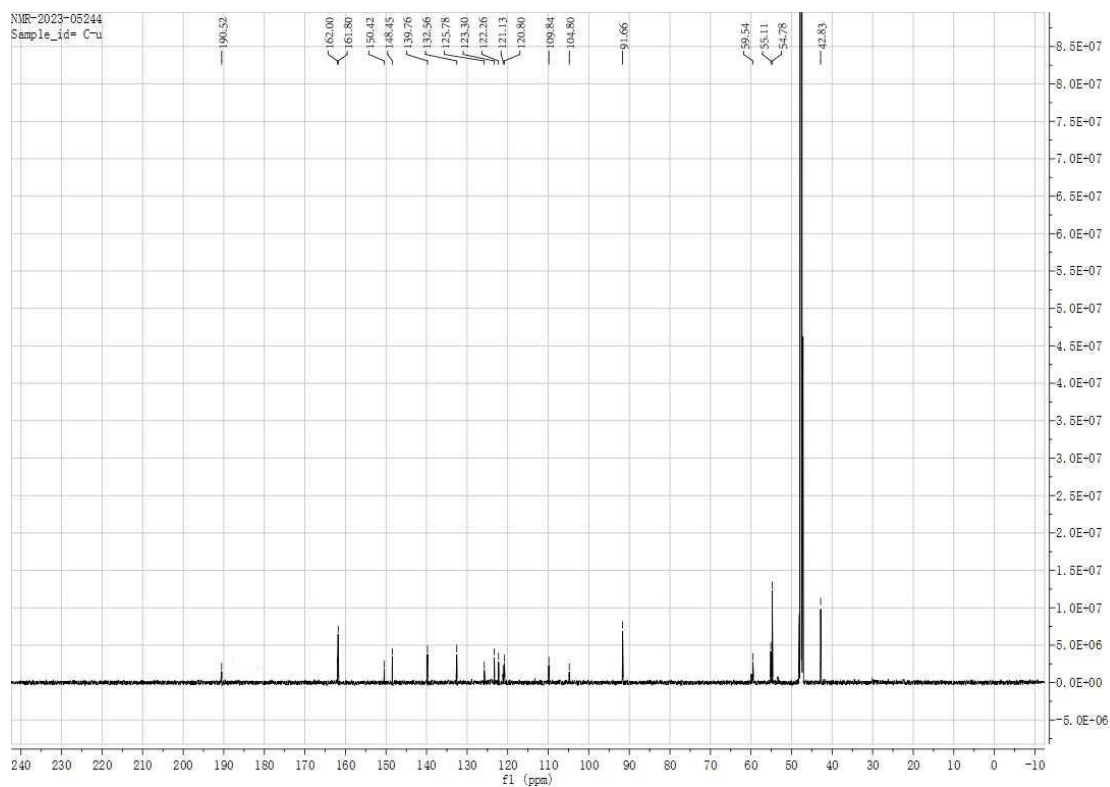

Supplementary Figure S28.  $^{13}\text{C}$ -NMR spectrum of **14** in  $\text{CD}_3\text{OD}$ .

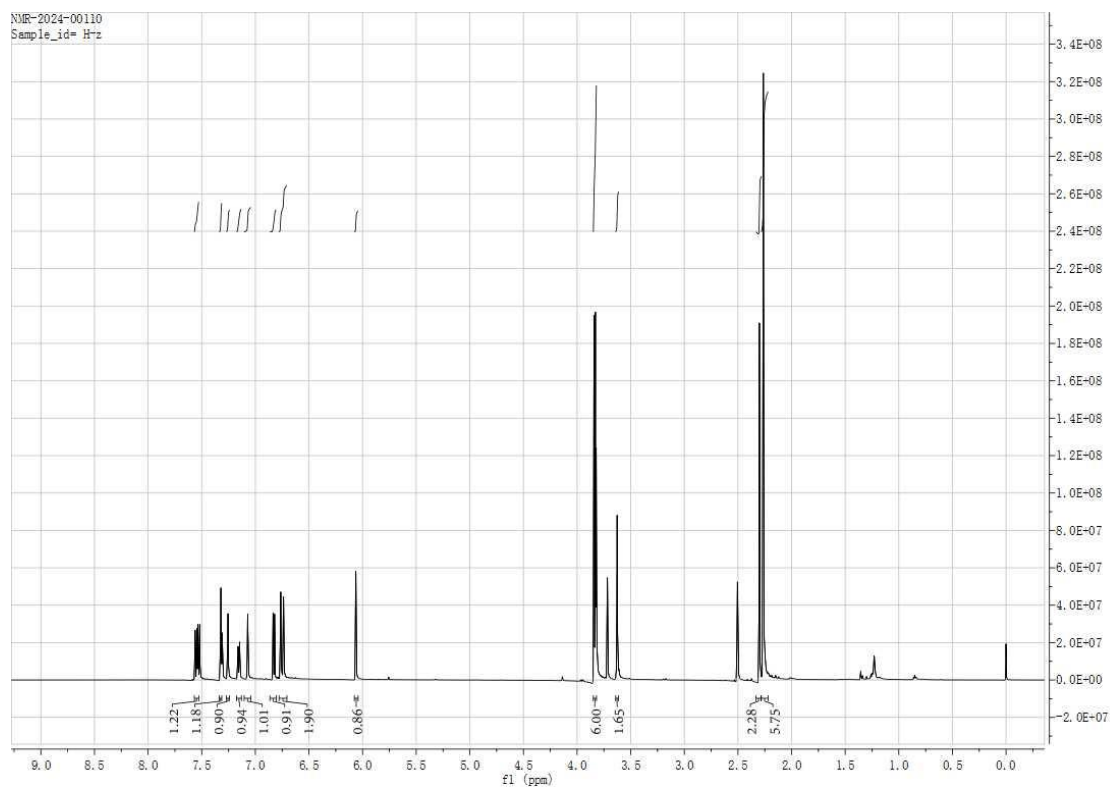

Supplementary Figure S29.  $^1\text{H}$ -NMR spectrum of **15** in  $\text{DMSO}-d_6$ .

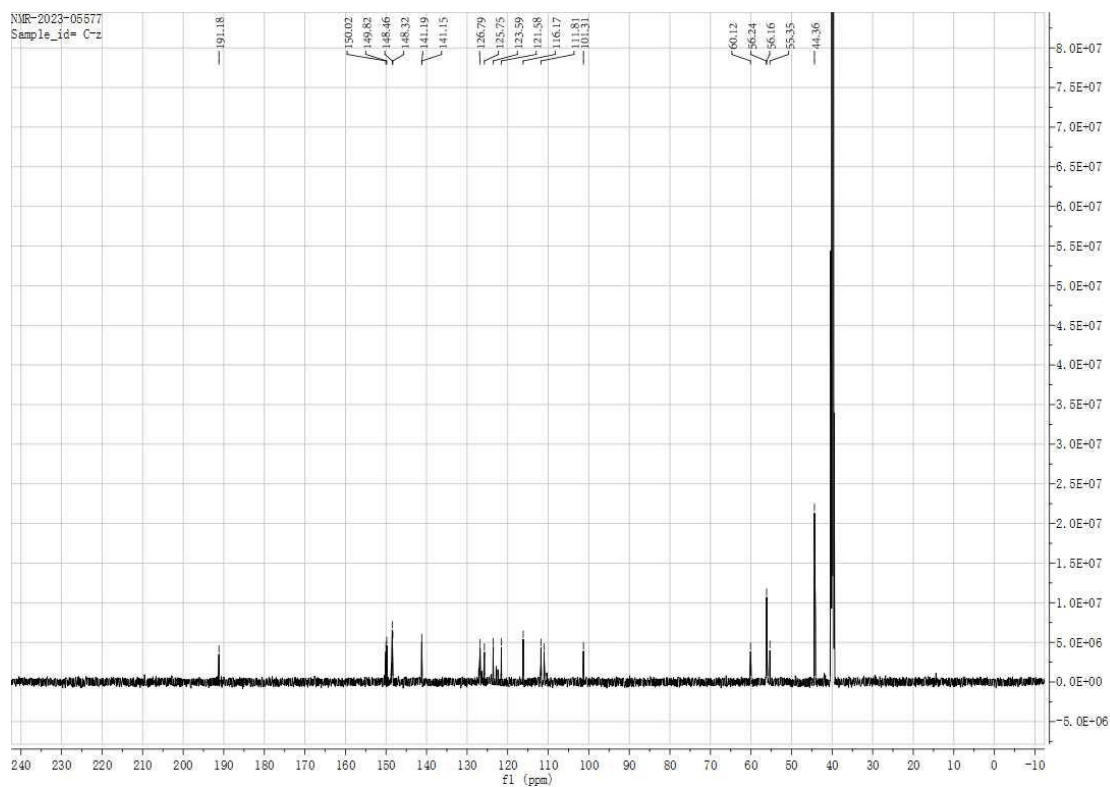

Supplementary Figure S30.  $^{13}\text{C}$ -NMR spectrum of **15** in  $\text{DMSO}-d_6$ .

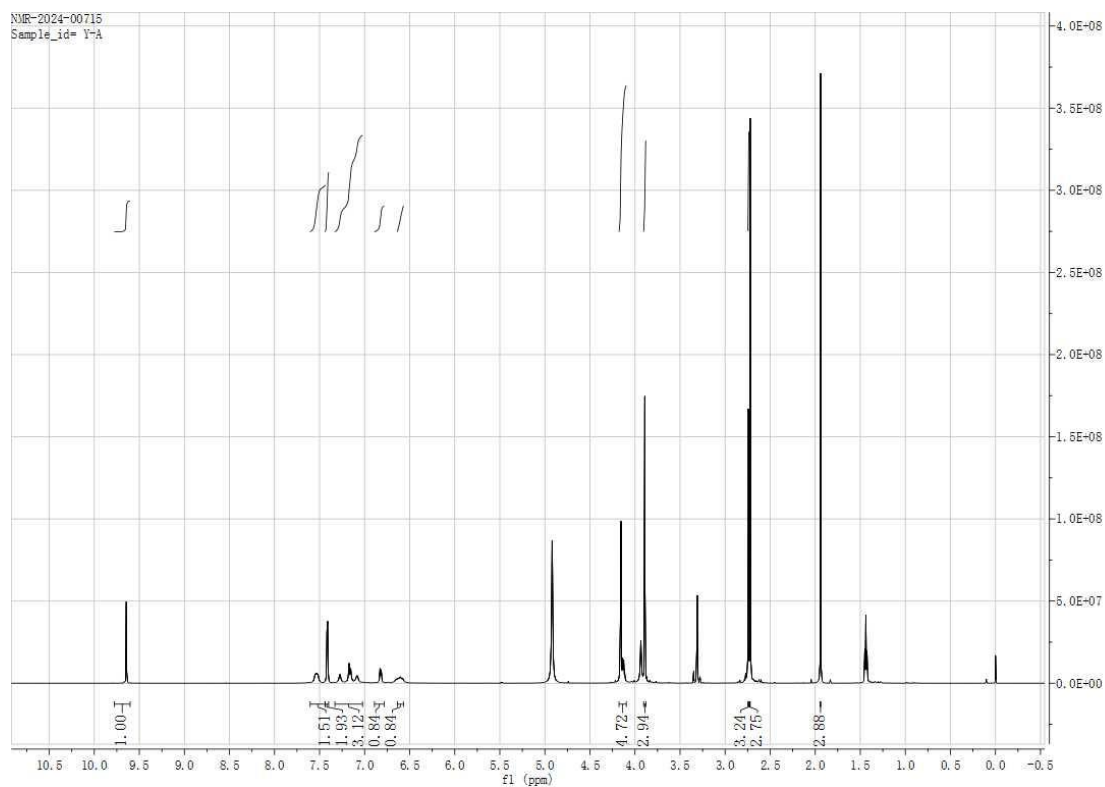

Supplementary Figure S31.  $^1\text{H}$ -NMR spectrum of **1a** in  $\text{CD}_3\text{OD}$ .

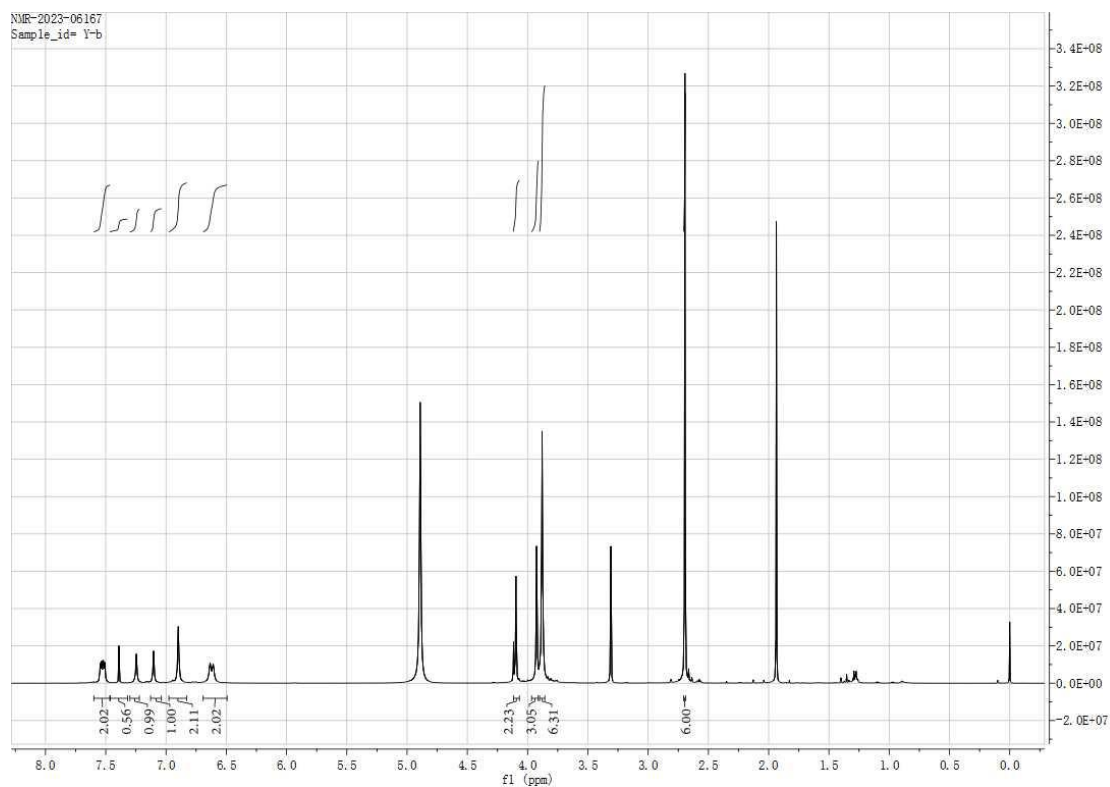

Supplementary Figure S32.  $^1\text{H}$ -NMR spectrum of **2a** in  $\text{CD}_3\text{OD}$ .

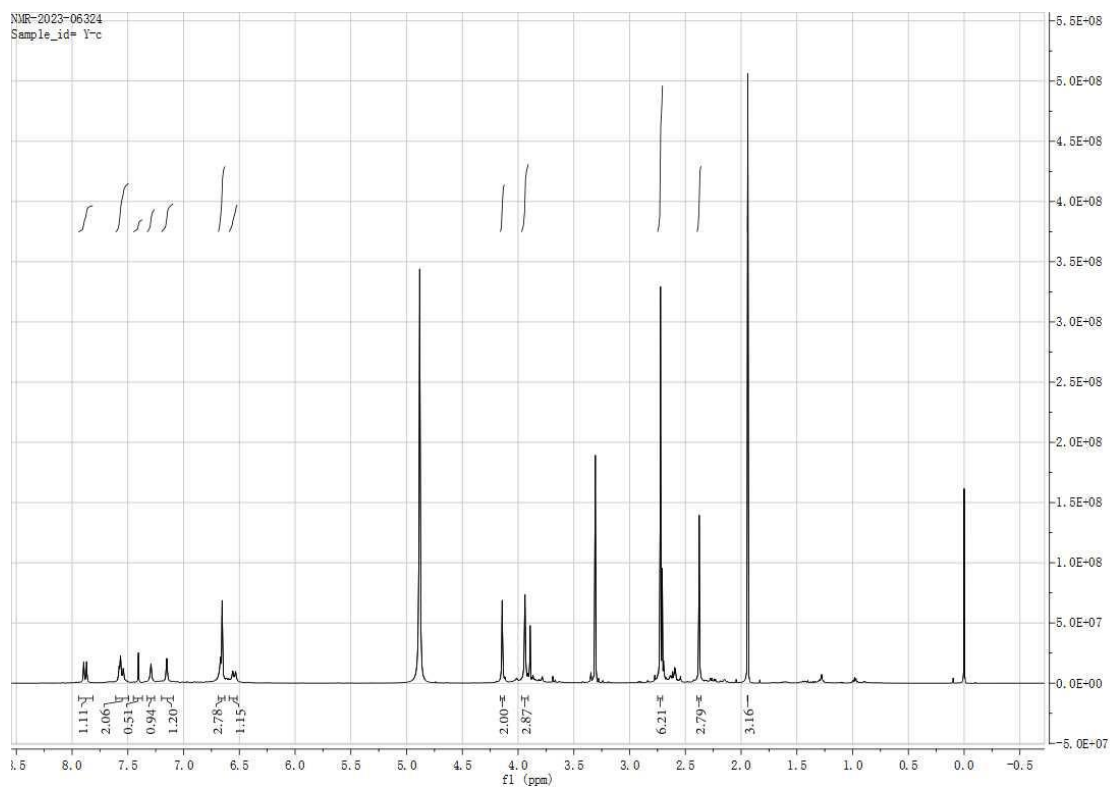

Supplementary Figure S33.  $^1\text{H}$ -NMR spectrum of **3a** in  $\text{CD}_3\text{OD}$ .

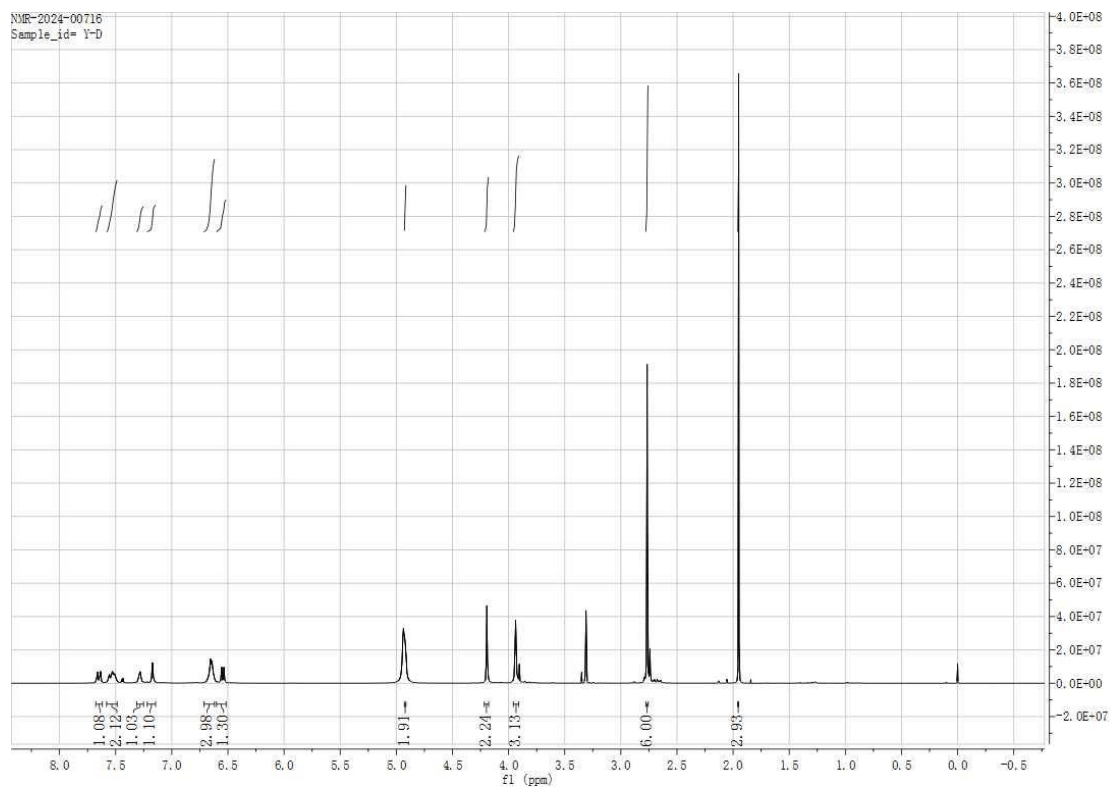

Supplementary Figure S34.  $^1\text{H}$ -NMR spectrum of **4a** in  $\text{CD}_3\text{OD}$ .

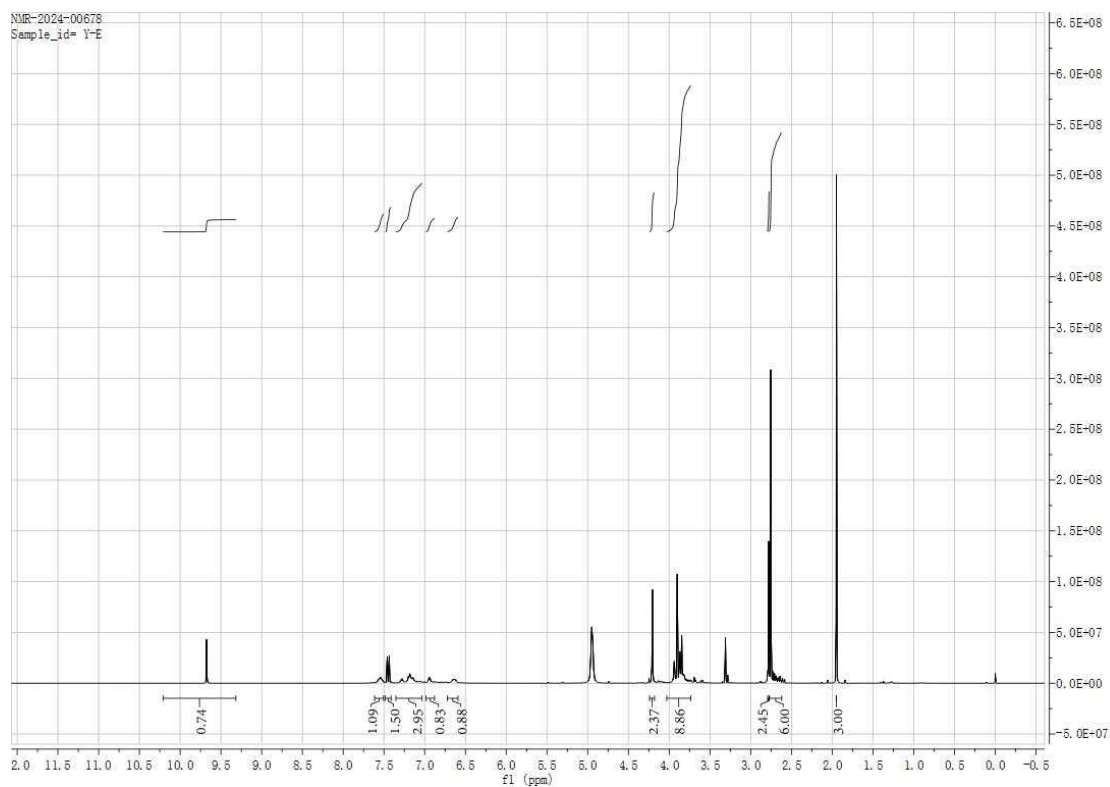

Supplementary Figure S35.  $^1\text{H}$ -NMR spectrum of **5a** in  $\text{CD}_3\text{OD}$ .

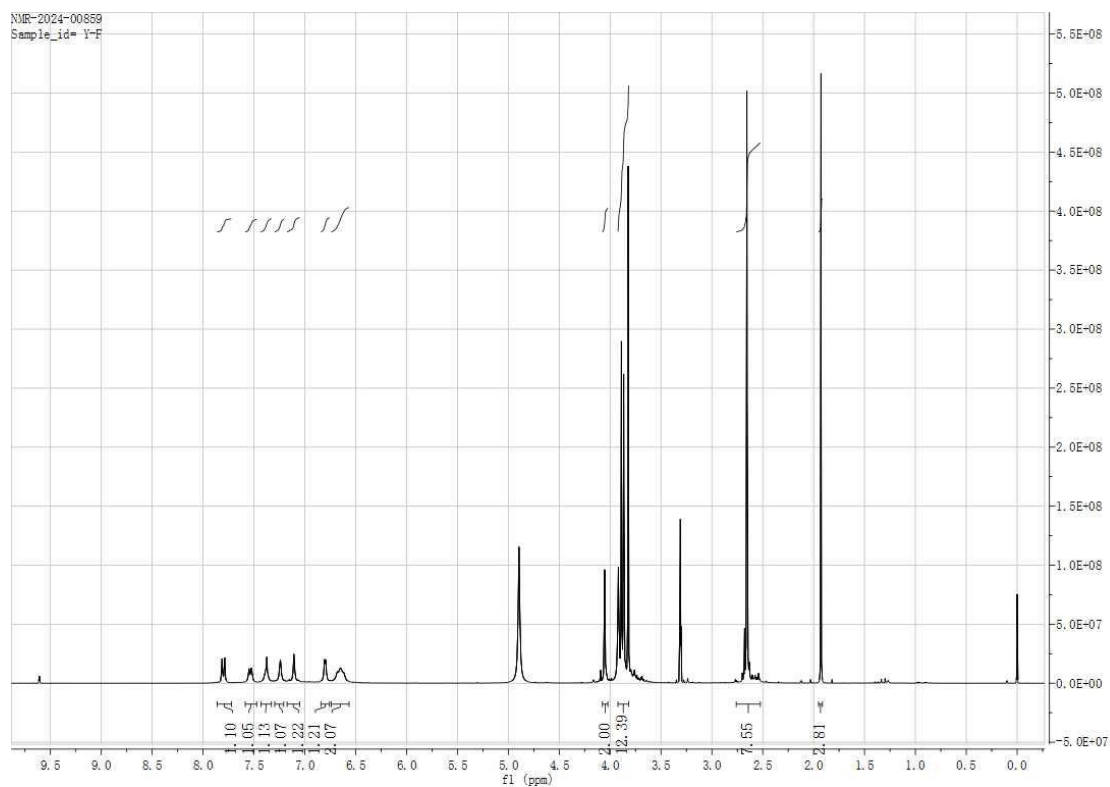

Supplementary Figure S36.  $^1\text{H}$ -NMR spectrum of **6a** in  $\text{CD}_3\text{OD}$ .

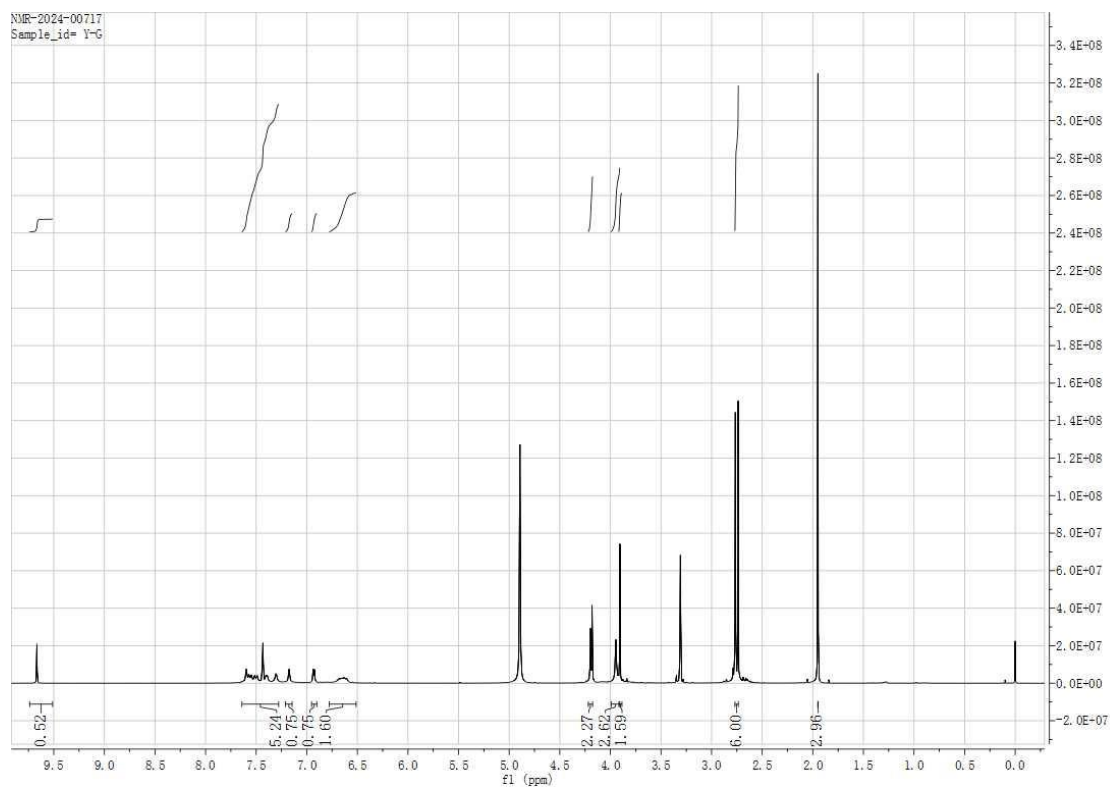

Supplementary Figure S37.  $^1\text{H}$ -NMR spectrum of **7a** in  $\text{CD}_3\text{OD}$ .

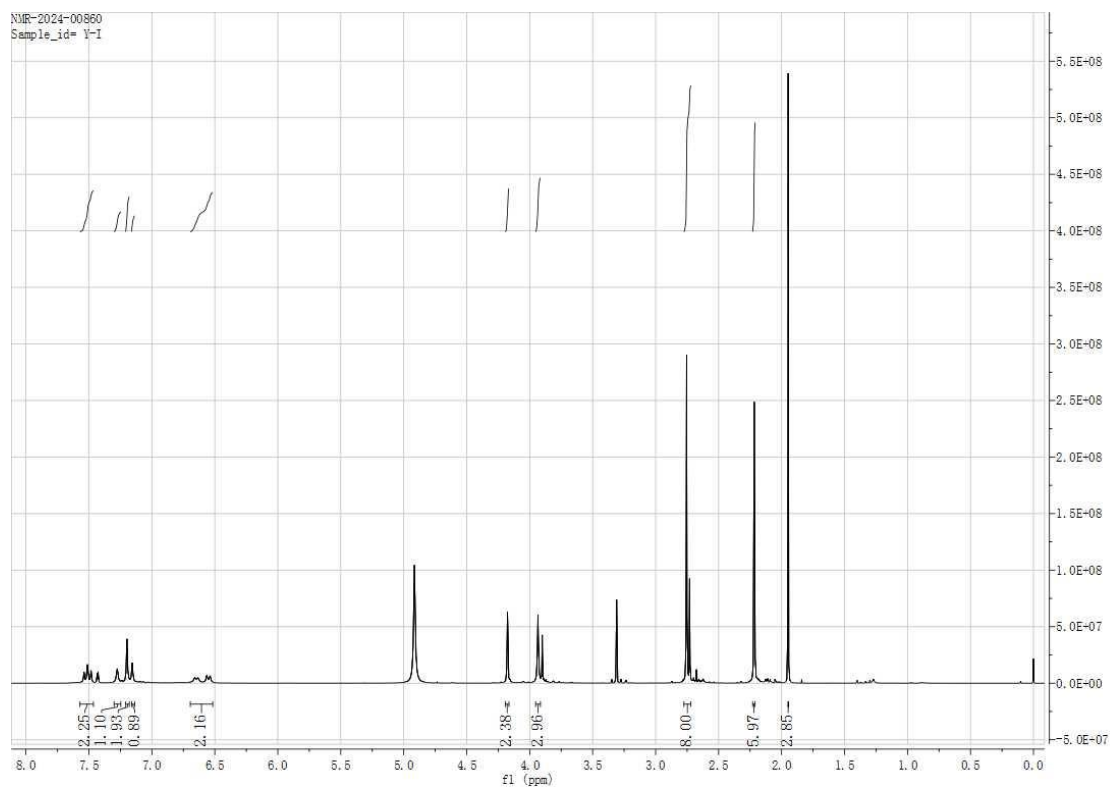

Supplementary Figure S38.  $^1\text{H}$ -NMR spectrum of **8a** in  $\text{CD}_3\text{OD}$ .

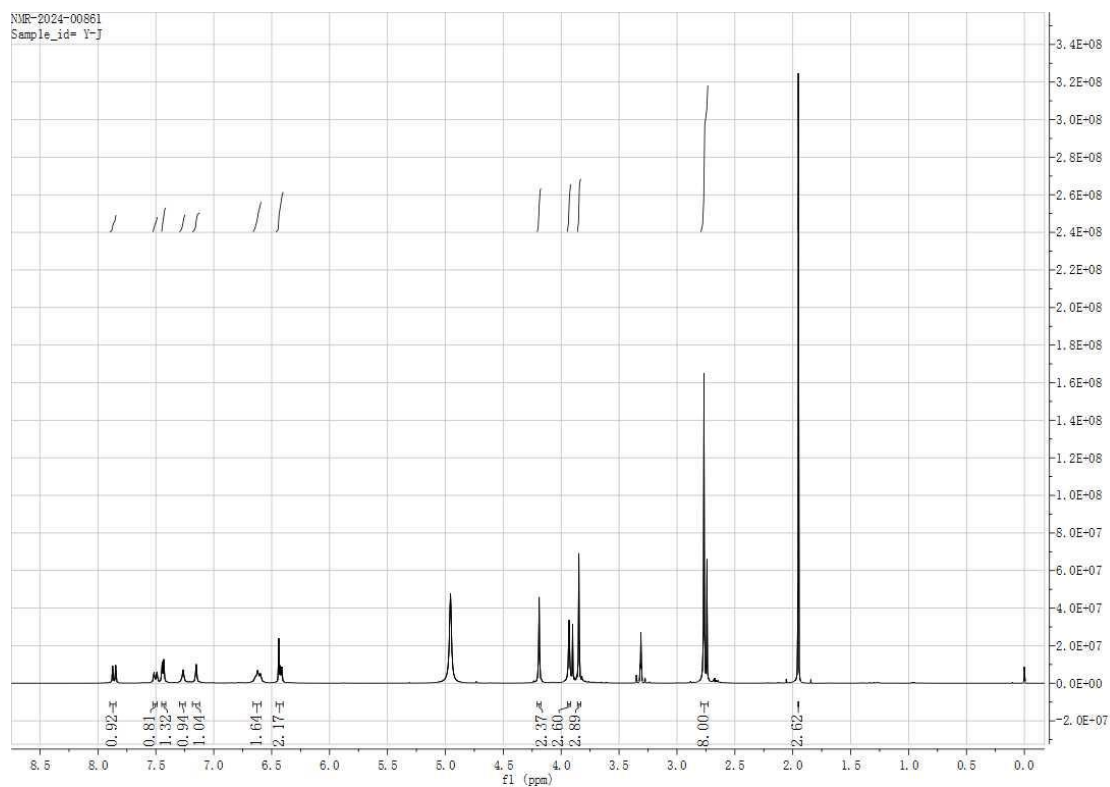

Supplementary Figure S39.  $^1\text{H}$ -NMR spectrum of **9a** in  $\text{CD}_3\text{OD}$ .

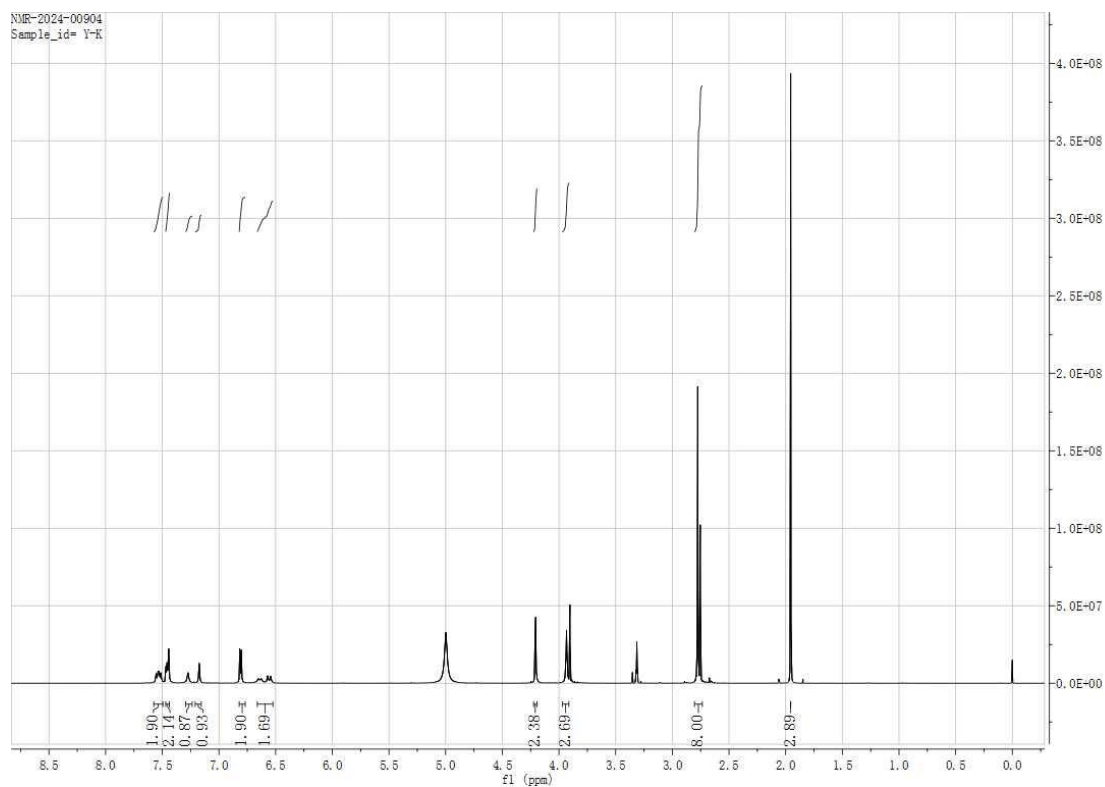

Supplementary Figure S40.  $^1\text{H}$ -NMR spectrum of 10a in  $\text{CD}_3\text{OD}$ .

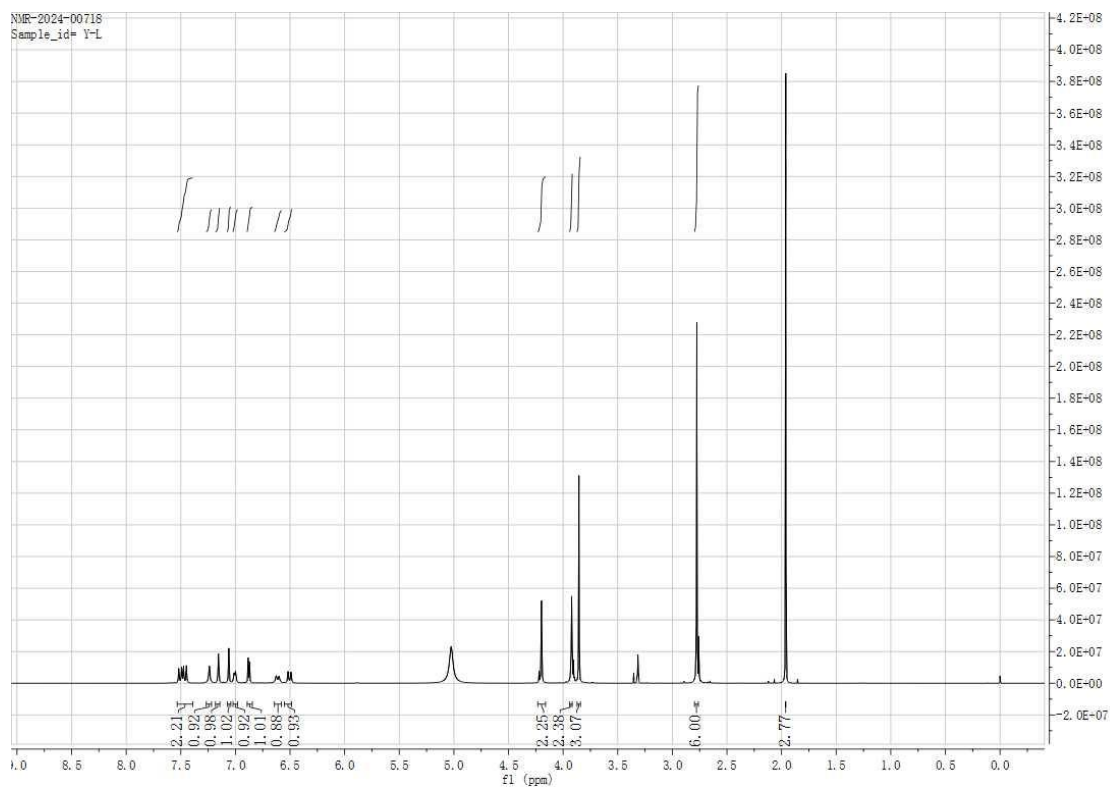

Supplementary Figure S41.  $^1\text{H}$ -NMR spectrum of 11a in  $\text{CD}_3\text{OD}$ .



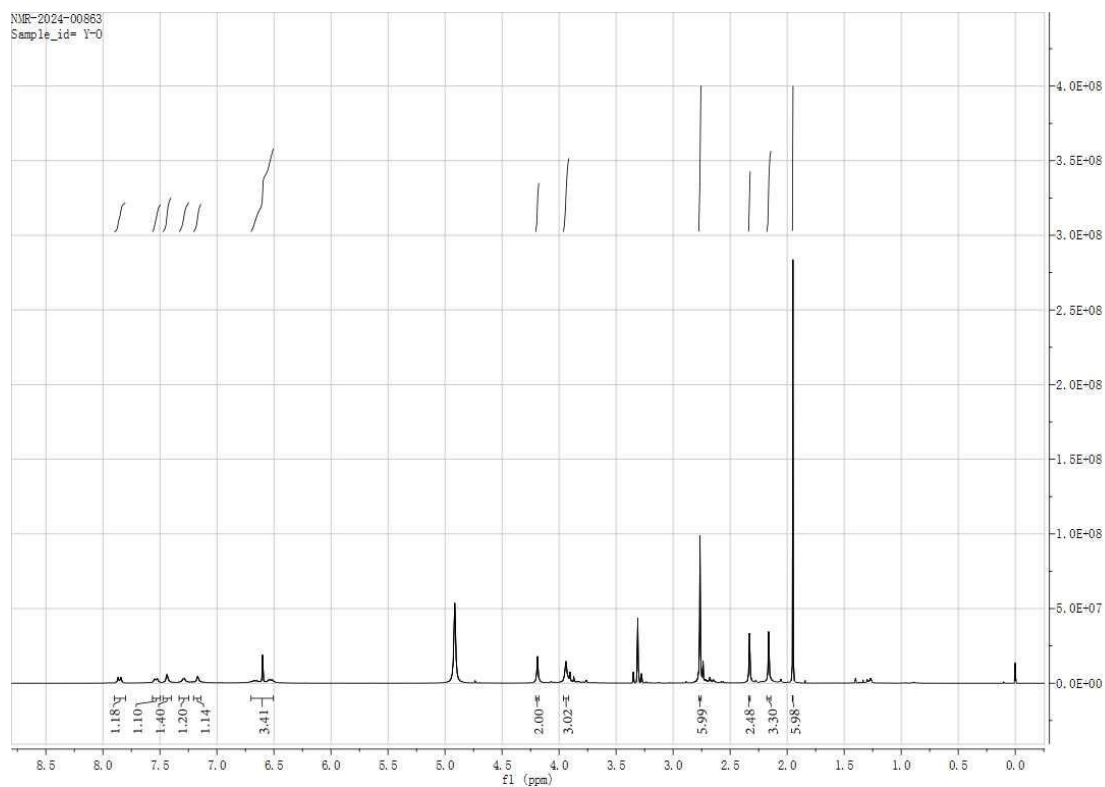

Supplementary Figure S42. <sup>1</sup>H-NMR spectrum of 12a in CD<sub>3</sub>OD.

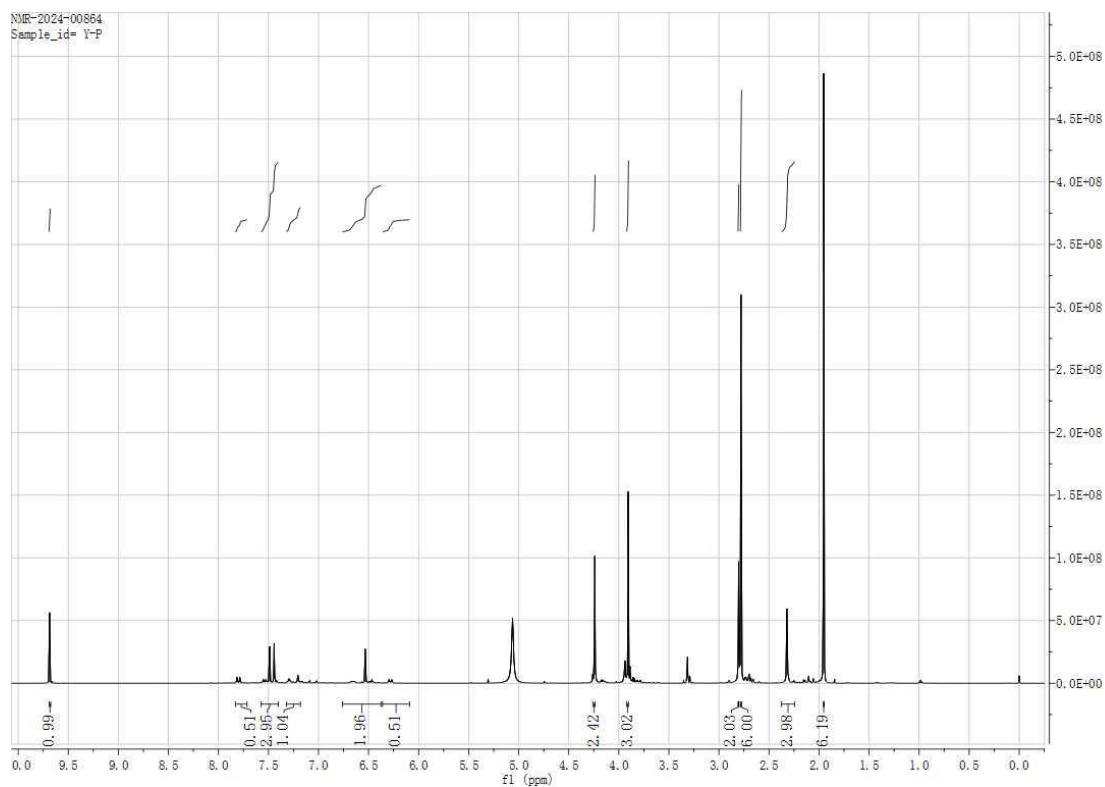

Supplementary Figure S43. <sup>1</sup>H-NMR spectrum of 13a in CD<sub>3</sub>OD.

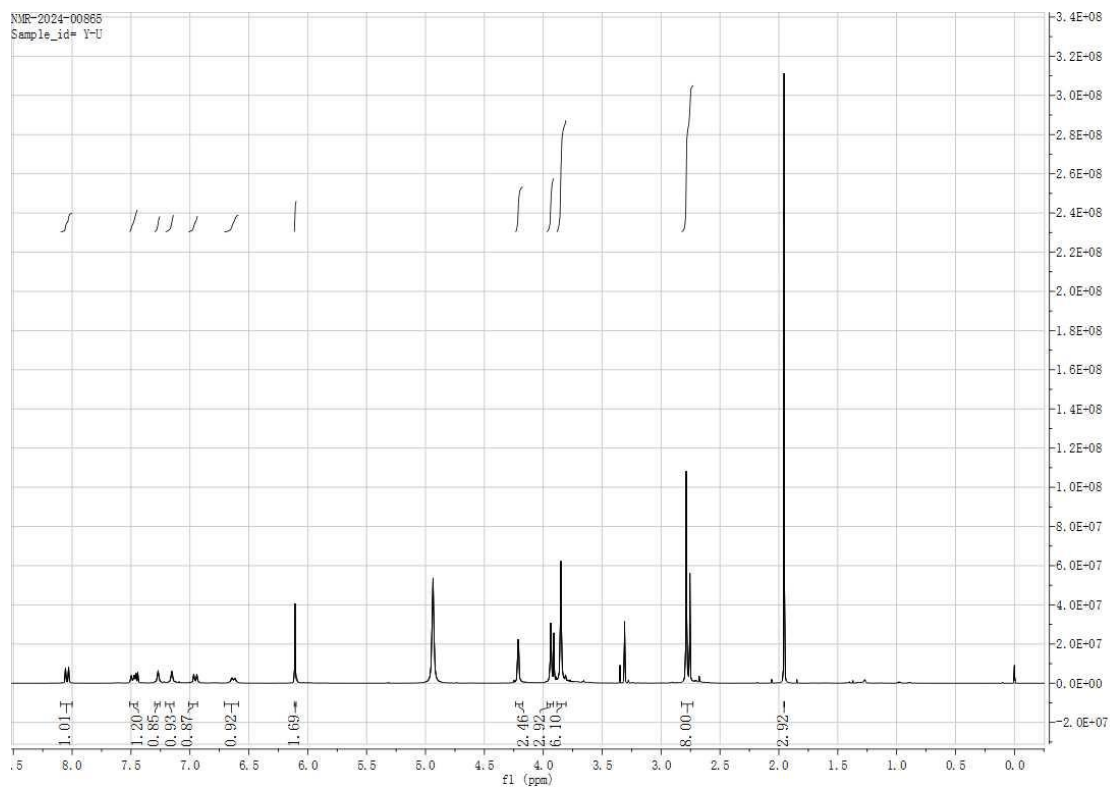

Supplementary Figure S44. <sup>1</sup>H-NMR spectrum of 14a in CD<sub>3</sub>OD.

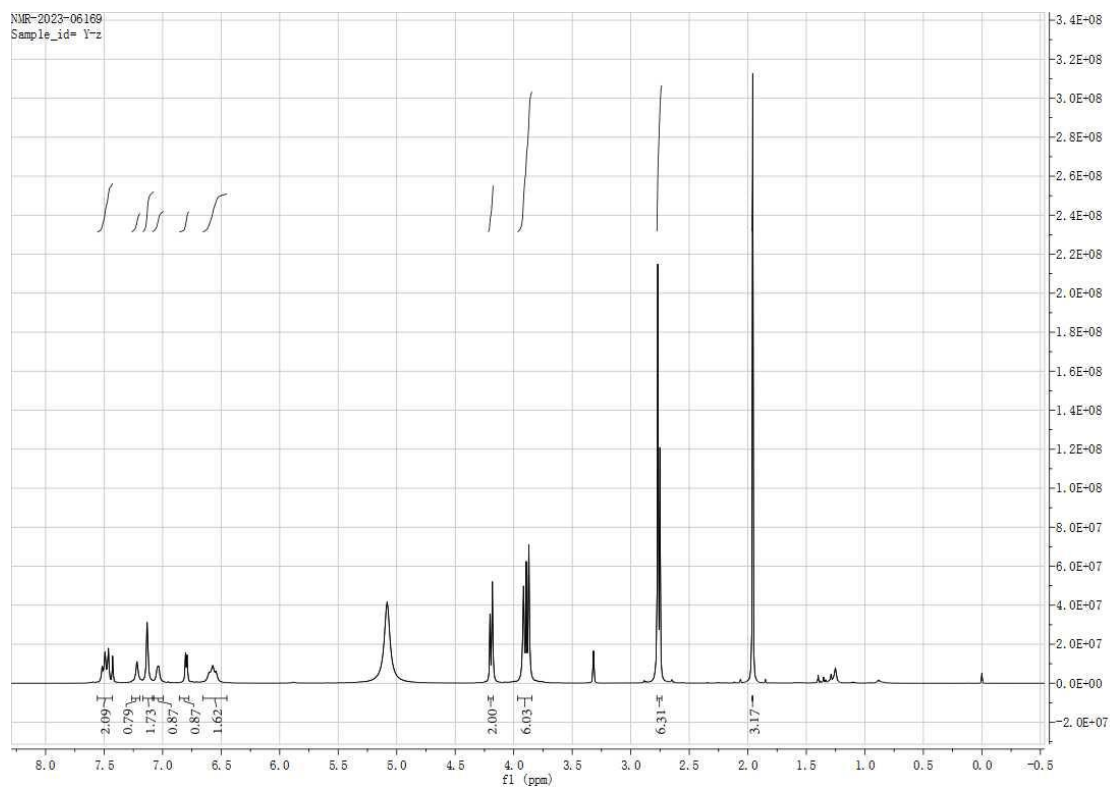

Supplementary Figure S45. <sup>1</sup>H-NMR spectrum of 15a in CD<sub>3</sub>OD.

### Qualitative Analysis Report

|                        |            |               |                             |
|------------------------|------------|---------------|-----------------------------|
| Data Filename          | 2456.d     | Sample Name   | L 2                         |
| Instrument Name        | TOF G6230A | Acquired Time | 2023-04-23                  |
| Acq Method             | YCLM       | Acquired SW   | 6200 series TOF/6500 series |
| IRM Calibration Status | Success    |               |                             |
| User Chromatograms     |            |               |                             |

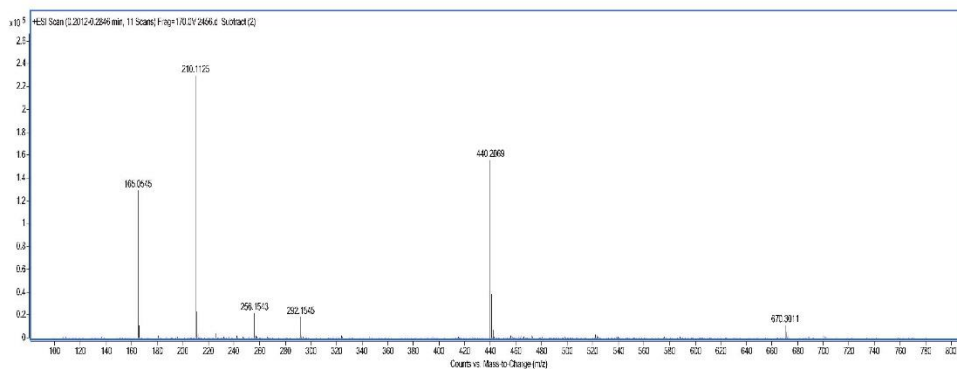

Supplementary Figure S46. HR-ESI-MS spectrum of 1.

### Qualitative Analysis Report

|                        |            |               |                             |
|------------------------|------------|---------------|-----------------------------|
| Data Filename          | 2457.d     | Sample Name   | L 4                         |
| Instrument Name        | TOF G6230A | Acquired Time | 2023-04-23                  |
| Acq Method             | YCLM       | Acquired SW   | 6200 series TOF/6500 series |
| IRM Calibration Status | Success    |               |                             |
| User Chromatograms     |            |               |                             |

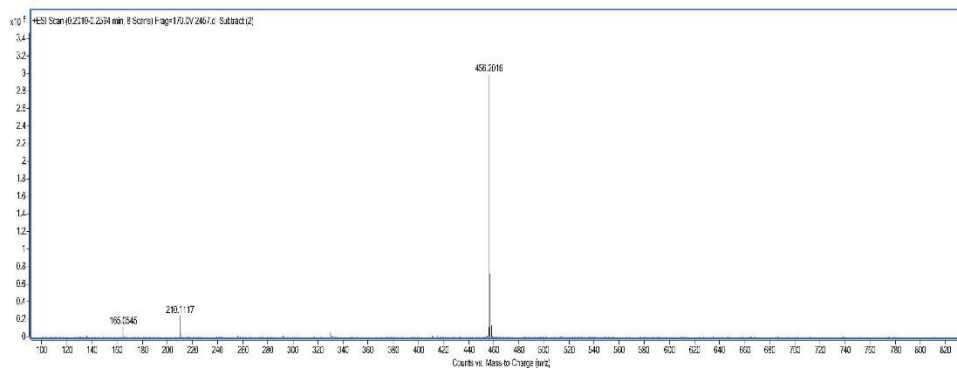

Supplementary Figure S47. HR-ESI-MS spectrum of 2.

### Qualitative Analysis Report

|                        |            |               |                             |
|------------------------|------------|---------------|-----------------------------|
| Data Filename          | 2171.d     | Sample Name   | L 6                         |
| Instrument Name        | TOF G6230A | Acquired Time | 2023-04-13                  |
| Acq Method             | YCLM       | Acquired SW   | 6200 series TOF/6500 series |
| IRM Calibration Status | Success    |               |                             |
| User Chromatograms     |            |               |                             |

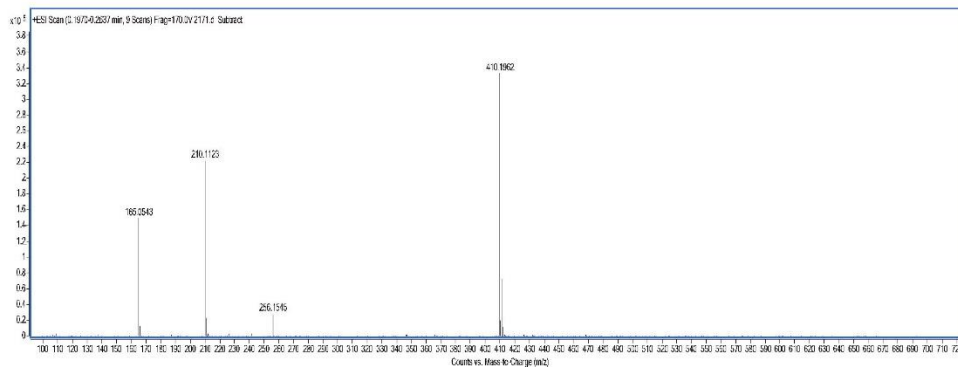

Supplementary Figure S48. HR-ESI-MS spectrum of 3.

### Qualitative Analysis Report

|                        |            |               |                             |
|------------------------|------------|---------------|-----------------------------|
| Data Filename          | 2172.d     | Sample Name   | L 8                         |
| Instrument Name        | TOF G6230A | Acquired Time | 2023-04-13                  |
| Acq Method             | YCLM       | Acquired SW   | 6200 series TOF/6500 series |
| IRM Calibration Status | Success    |               |                             |
| User Chromatograms     |            |               |                             |

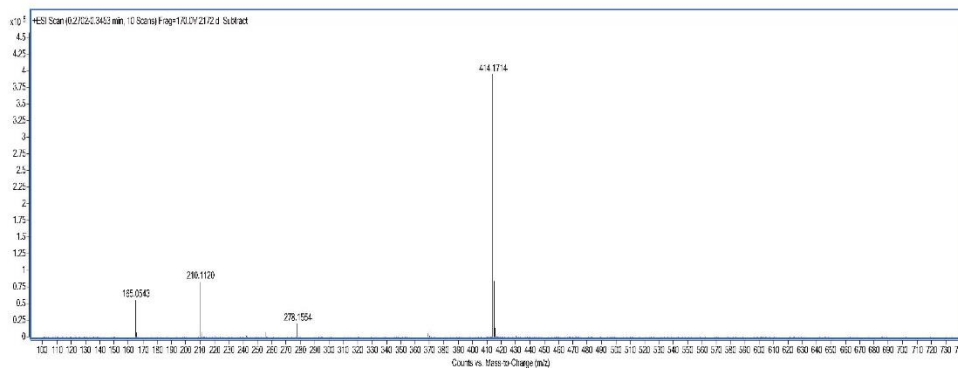

Supplementary Figure S49. HR-ESI-MS spectrum of 4.

### Qualitative Analysis Report

|                        |            |               |                             |
|------------------------|------------|---------------|-----------------------------|
| Data Filename          | 2176.d     | Sample Name   | L 10                        |
| Instrument Name        | TOF G6230A | Acquired Time | 2023-04-13                  |
| Acq Method             | YCLM       | Acquired SW   | 6200 series TOF/6500 series |
| IRM Calibration Status | Success    |               |                             |
| User Chromatograms     |            |               |                             |

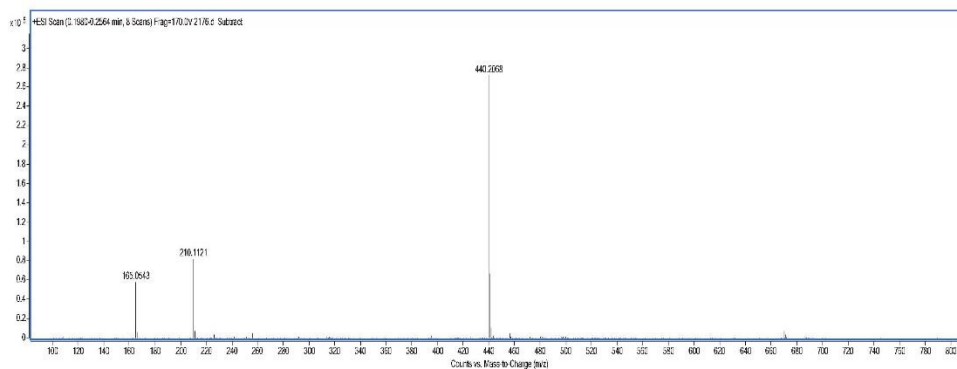

Supplementary Figure S50. HR-ESI-MS spectrum of 5.

### Qualitative Analysis Report

|                        |            |               |                             |
|------------------------|------------|---------------|-----------------------------|
| Data Filename          | 2458.d     | Sample Name   | L 12                        |
| Instrument Name        | TOF G6230A | Acquired Time | 2023-04-23                  |
| Acq Method             | YCLM       | Acquired SW   | 6200 series TOF/6500 series |
| IRM Calibration Status | Success    |               |                             |
| User Chromatograms     |            |               |                             |

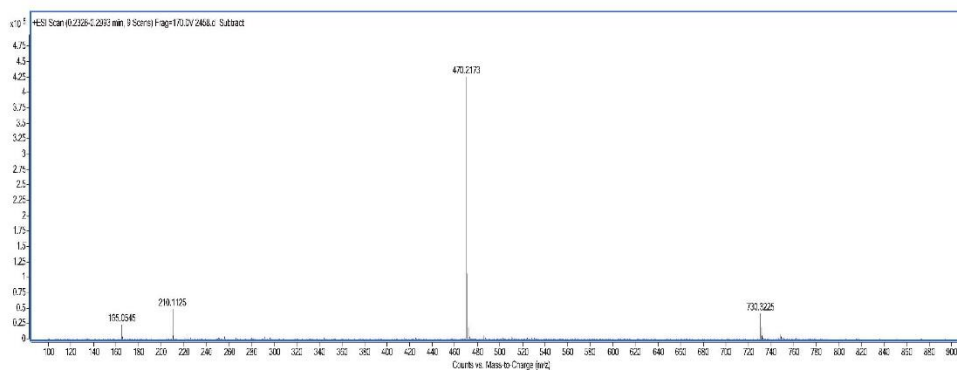

Supplementary Figure S51. HR-ESI-MS spectrum of 6.

### Qualitative Analysis Report

|                        |            |               |                             |
|------------------------|------------|---------------|-----------------------------|
| Data Filename          | 2459.d     | Sample Name   | L 14                        |
| Instrument Name        | TOF G6230A | Acquired Time | 2023-04-23                  |
| Acq Method             | YCLM       | Acquired SW   | 6200 series TOF/6500 series |
| IRM Calibration Status | Success    |               |                             |
| User Chromatograms     |            |               |                             |

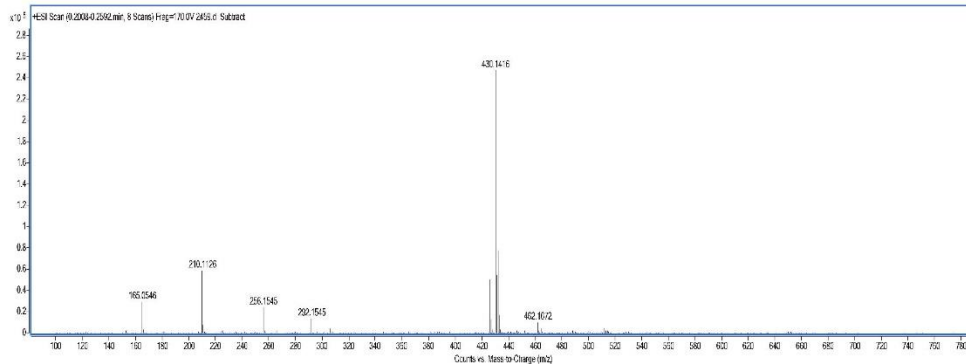

Supplementary Figure S52. HR-ESI-MS spectrum of 7.

### Qualitative Analysis Report

|                        |            |               |                             |
|------------------------|------------|---------------|-----------------------------|
| Data Filename          | 2460.d     | Sample Name   | L 16                        |
| Instrument Name        | TOF G6230A | Acquired Time | 2023-04-23                  |
| Acq Method             | YCLM       | Acquired SW   | 6200 series TOF/6500 series |
| IRM Calibration Status | Success    |               |                             |
| User Chromatograms     |            |               |                             |

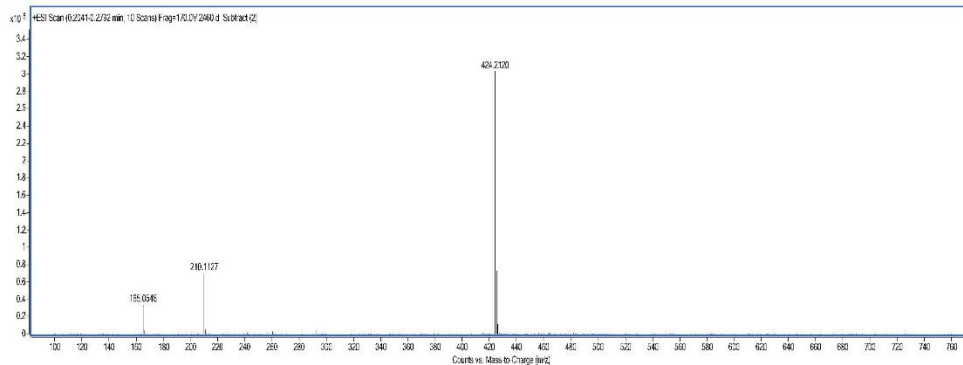

Supplementary Figure S53. HR-ESI-MS spectrum of 8.

## Qualitative Analysis Report

|                        |            |               |                             |
|------------------------|------------|---------------|-----------------------------|
| Data Filename          | 2177.d     | Sample Name   | L 18                        |
| Instrument Name        | TOF G6230A | Acquired Time | 2023-04-13                  |
| Acq Method             | YCLM       | Acquired SW   | 6200 series TOF/6500 series |
| IRM Calibration Status | Success    |               |                             |
| User Chromatograms     |            |               |                             |

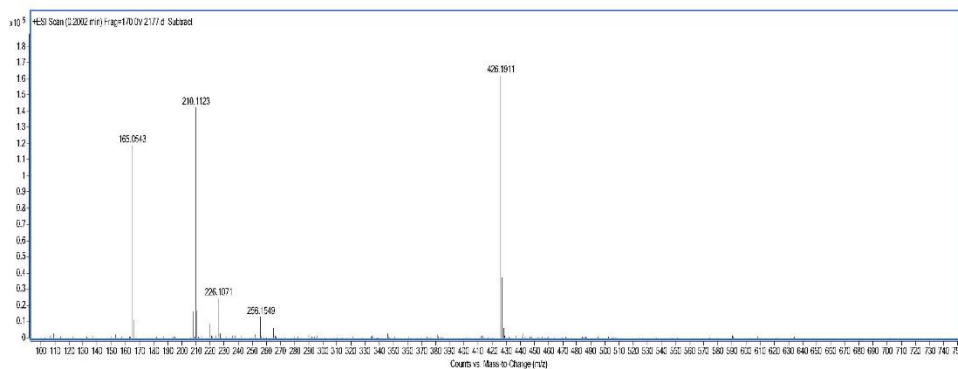

Supplementary Figure S54. HR-ESI-MS spectrum of 9.

## Qualitative Analysis Report

|                        |            |               |                             |
|------------------------|------------|---------------|-----------------------------|
| Data Filename          | 2461.d     | Sample Name   | L 20                        |
| Instrument Name        | TOF G6230A | Acquired Time | 2023-04-23                  |
| Acq Method             | YCLM       | Acquired SW   | 6200 series TOF/6500 series |
| IRM Calibration Status | Success    |               |                             |
| User Chromatograms     |            |               |                             |

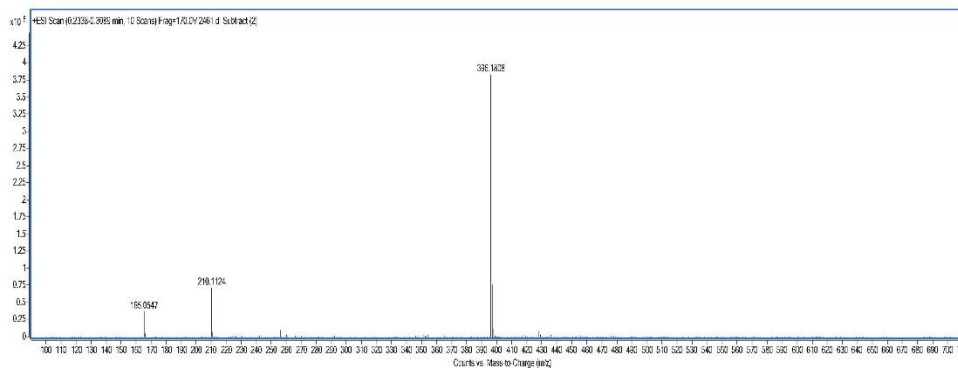

Supplementary Figure S55. HR-ESI-MS spectrum of 10.

### Qualitative Analysis Report

|                        |            |               |                             |
|------------------------|------------|---------------|-----------------------------|
| Data Filename          | 2178.d     | Sample Name   | L 22                        |
| Instrument Name        | TOF G6230A | Acquired Time | 2023-04-13                  |
| Acq Method             | YCLM       | Acquired SW   | 6200 series TOF/6500 series |
| IRM Calibration Status | Success    |               |                             |
| User Chromatograms     |            |               |                             |

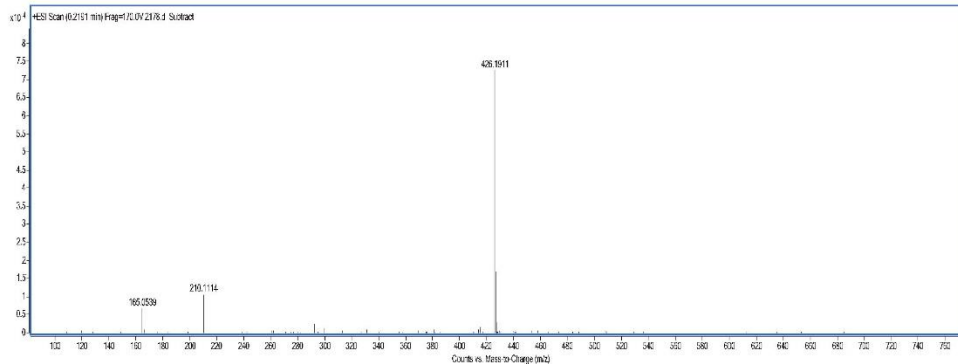

Supplementary Figure S56. HR-ESI-MS spectrum of 11.

### Qualitative Analysis Report

|                        |            |               |                             |
|------------------------|------------|---------------|-----------------------------|
| Data Filename          | 3456.d     | Sample Name   | L 24                        |
| Instrument Name        | TOF G6230A | Acquired Time | 2023-05-29                  |
| Acq Method             | YCLM       | Acquired SW   | 6200 series TOF/6500 series |
| IRM Calibration Status | Success    |               |                             |
| User Chromatograms     |            |               |                             |

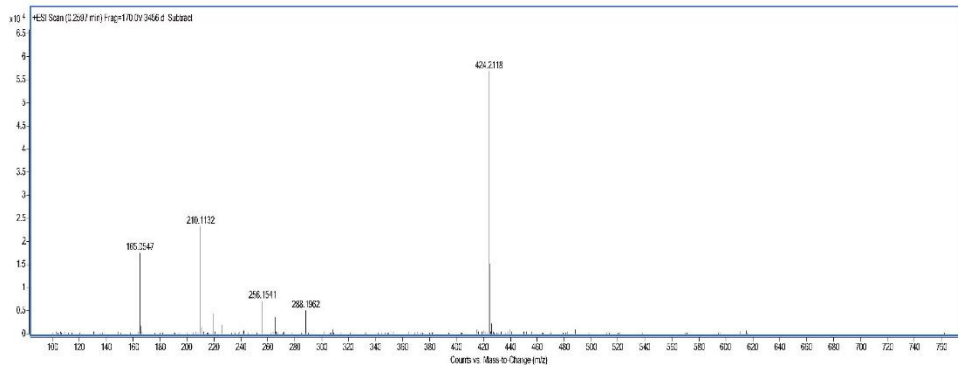

Supplementary Figure S57. HR-ESI-MS spectrum of 12.



### Qualitative Analysis Report

|                        |            |               |                             |
|------------------------|------------|---------------|-----------------------------|
| Data Filename          | 2464.d     | Sample Name   | L 26                        |
| Instrument Name        | TOF G6230A | Acquired Time | 2023-04-23                  |
| Acq Method             | YCLM       | Acquired SW   | 6200 series TOF/6500 series |
| IRM Calibration Status | Success    |               |                             |
| User Chromatograms     |            |               |                             |

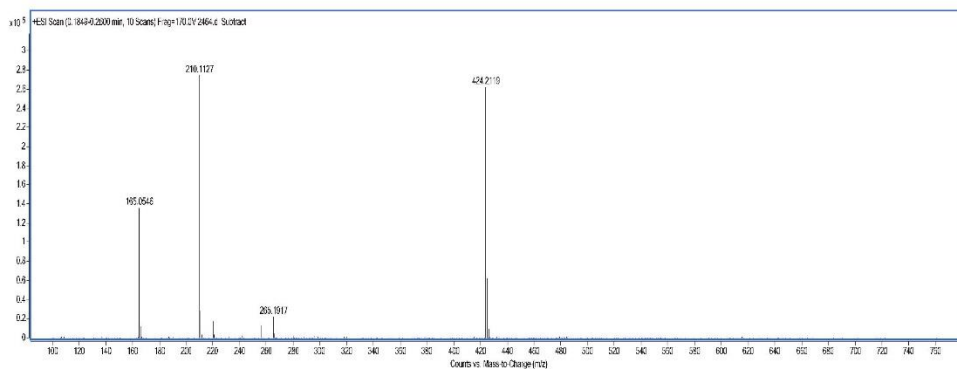

Supplementary Figure S58. HR-ESI-MS spectrum of 13.

### Qualitative Analysis Report

|                        |            |               |                             |
|------------------------|------------|---------------|-----------------------------|
| Data Filename          | 3457.d     | Sample Name   | L 28                        |
| Instrument Name        | TOF G6230A | Acquired Time | 2023-05-29                  |
| Acq Method             | YCLM       | Acquired SW   | 6200 series TOF/6500 series |
| IRM Calibration Status | Success    |               |                             |
| User Chromatograms     |            |               |                             |

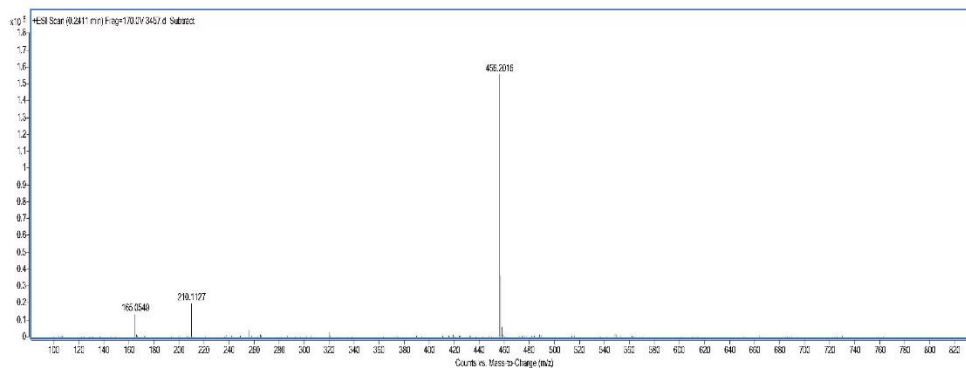

Supplementary Figure S59. HR-ESI-MS spectrum of 14.

### Qualitative Analysis Report

|                        |            |               |                             |
|------------------------|------------|---------------|-----------------------------|
| Data Filename          | 2462.d     | Sample Name   | L 30                        |
| Instrument Name        | TOF G6230A | Acquired Time | 2023-04-23                  |
| Acq Method             | YCLM       | Acquired SW   | 6200 series TOF/6500 series |
| IRM Calibration Status | Success    |               |                             |
| User Chromatograms     |            |               |                             |

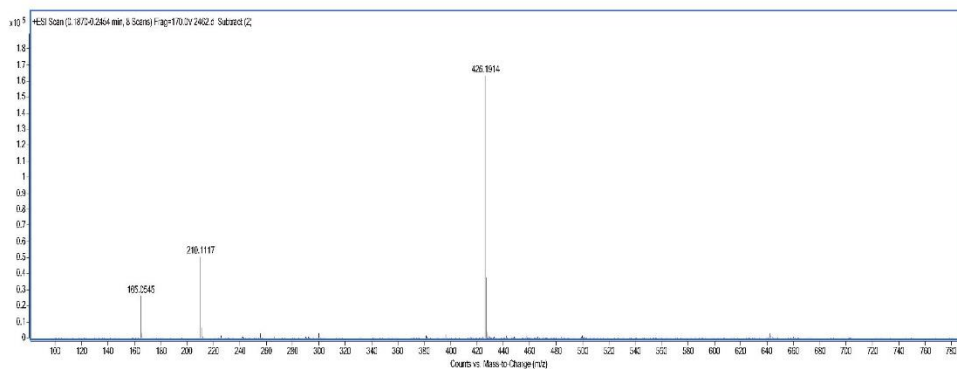

Supplementary Figure S60. HR-ESI-MS spectrum of 15.

### Qualitative Analysis Report

|                        |            |               |                             |
|------------------------|------------|---------------|-----------------------------|
| Data Filename          | 0837.d     | Sample Name   | YA 1                        |
| Instrument Name        | TOF G6230A | Acquired Time | 2024-03-12                  |
| Acq Method             | YCLM       | Acquired SW   | 6200 series TOF/6500 series |
| IRM Calibration Status | Success    |               |                             |
| User Chromatograms     |            |               |                             |

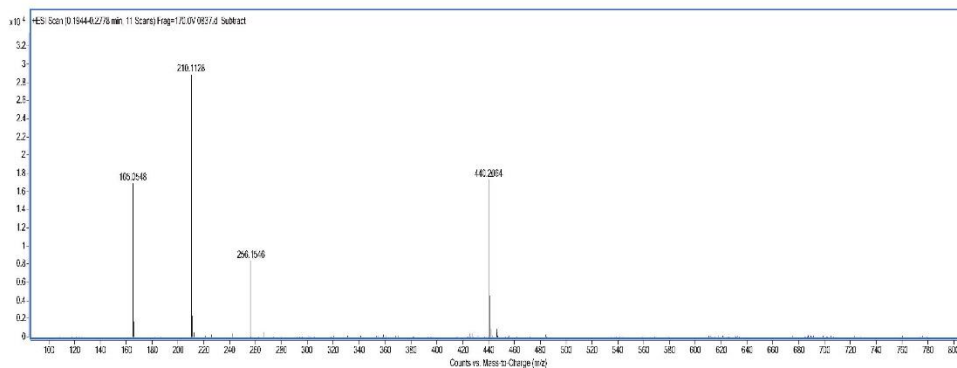

Supplementary Figure S61. HR-ESI-MS spectrum of 1a.

### Qualitative Analysis Report

|                        |            |               |                             |
|------------------------|------------|---------------|-----------------------------|
| Data Filename          | 0822.d     | Sample Name   | YB 1                        |
| Instrument Name        | TOF G6230A | Acquired Time | 2024-03-12                  |
| Acq Method             | YCLM       | Acquired SW   | 6200 series TOF/6500 series |
| IRM Calibration Status | Success    |               |                             |
| User Chromatograms     |            |               |                             |

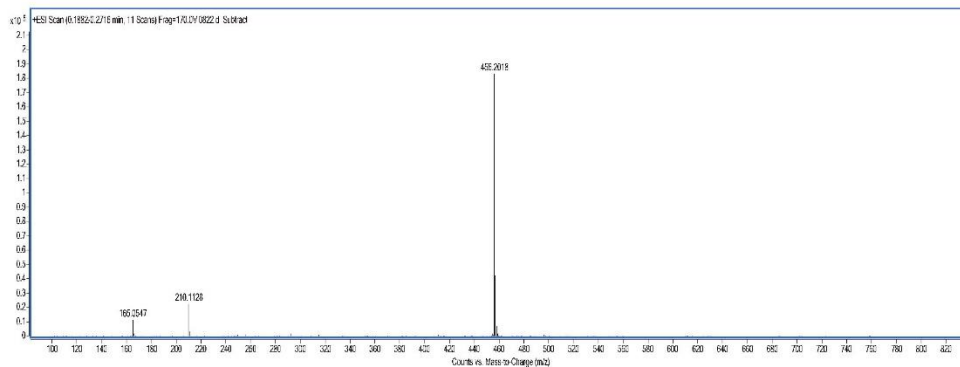

Supplementary Figure S62. HR-ESI-MS spectrum of 2a.

### Qualitative Analysis Report

|                        |            |               |                             |
|------------------------|------------|---------------|-----------------------------|
| Data Filename          | 0823.d     | Sample Name   | YC 1                        |
| Instrument Name        | TOF G6230A | Acquired Time | 2024-03-12                  |
| Acq Method             | YCLM       | Acquired SW   | 6200 series TOF/6500 series |
| IRM Calibration Status | Success    |               |                             |
| User Chromatograms     |            |               |                             |

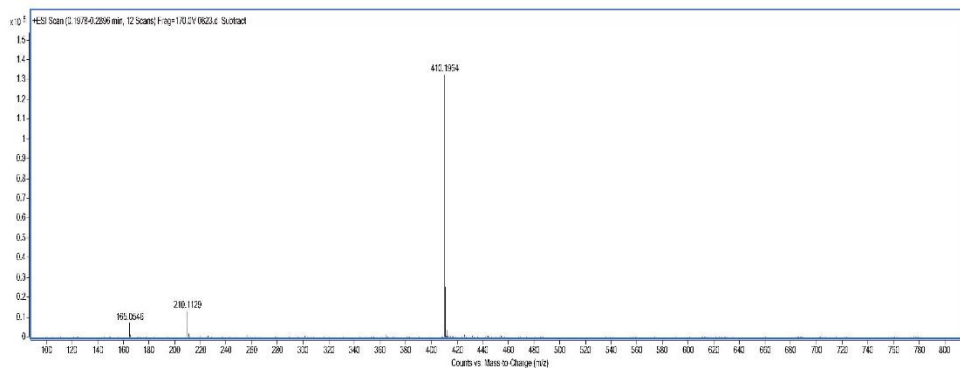

Supplementary Figure S63. HR-ESI-MS spectrum of 3a.

### Qualitative Analysis Report

|                        |            |               |                             |
|------------------------|------------|---------------|-----------------------------|
| Data Filename          | 0825.d     | Sample Name   | YD 1                        |
| Instrument Name        | TOF G6230A | Acquired Time | 2024-03-12                  |
| Acq Method             | YCLM       | Acquired SW   | 6200 series TOF/6500 series |
| IRM Calibration Status | Success    |               |                             |
| User Chromatograms     |            |               |                             |

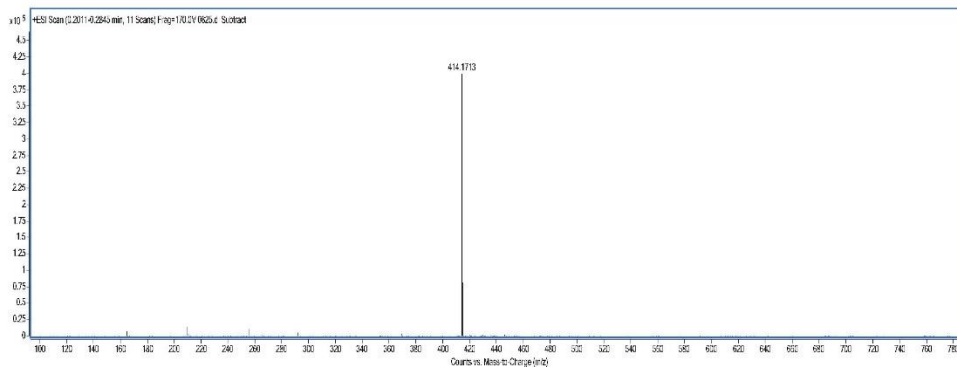

Supplementary Figure S64. HR-ESI-MS spectrum of 4a.

### Qualitative Analysis Report

|                        |            |               |                             |
|------------------------|------------|---------------|-----------------------------|
| Data Filename          | 0826.d     | Sample Name   | YE 1                        |
| Instrument Name        | TOF G6230A | Acquired Time | 2024-03-12                  |
| Acq Method             | YCLM       | Acquired SW   | 6200 series TOF/6500 series |
| IRM Calibration Status | Success    |               |                             |
| User Chromatograms     |            |               |                             |

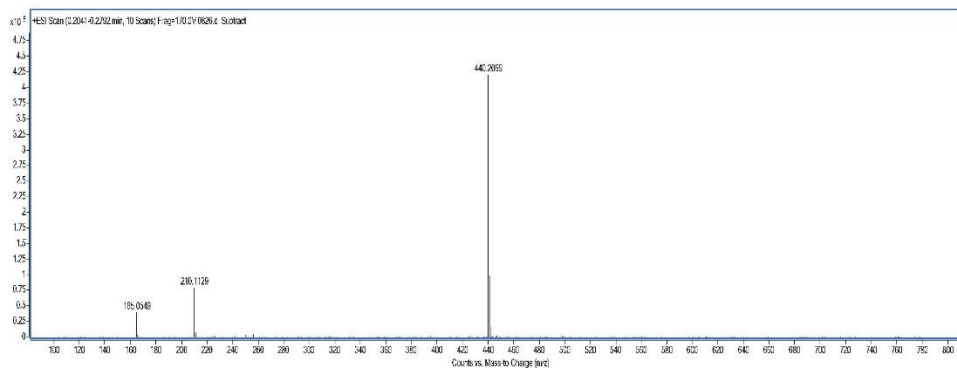

Supplementary Figure S65. HR-ESI-MS spectrum of 5a.

### Qualitative Analysis Report

|                        |            |               |                             |
|------------------------|------------|---------------|-----------------------------|
| Data Filename          | 0827.d     | Sample Name   | YF 1                        |
| Instrument Name        | TOF G6230A | Acquired Time | 2024-03-12                  |
| Acq Method             | YCLM       | Acquired SW   | 6200 series TOF/6500 series |
| IRM Calibration Status | Success    |               |                             |
| User Chromatograms     |            |               |                             |

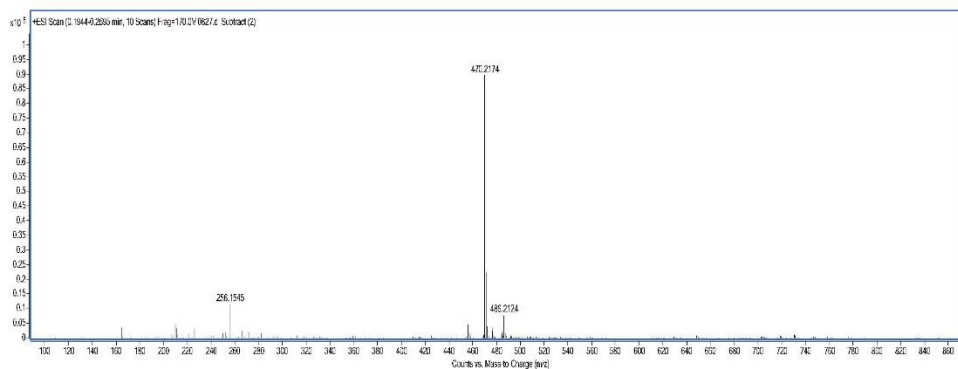

Supplementary Figure S66. HR-ESI-MS spectrum of 6a.

### Qualitative Analysis Report

|                        |            |               |                             |
|------------------------|------------|---------------|-----------------------------|
| Data Filename          | 0828.d     | Sample Name   | YG 1                        |
| Instrument Name        | TOF G6230A | Acquired Time | 2024-03-12                  |
| Acq Method             | YCLM       | Acquired SW   | 6200 series TOF/6500 series |
| IRM Calibration Status | Success    |               |                             |
| User Chromatograms     |            |               |                             |

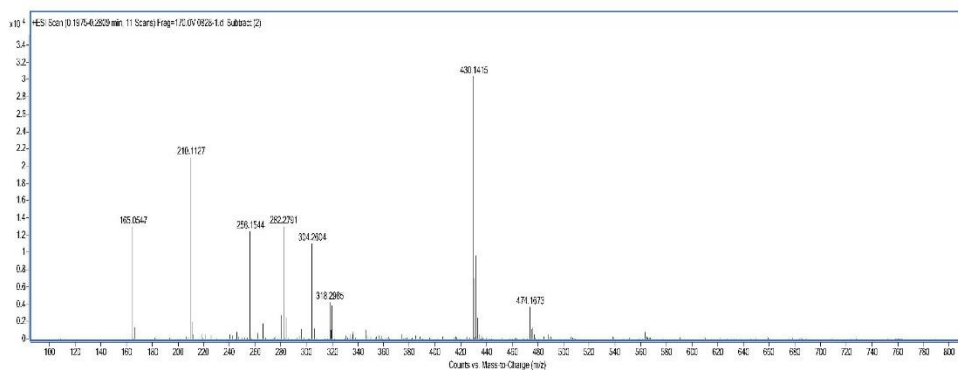

Supplementary Figure S67. HR-ESI-MS spectrum of 7a.

### Qualitative Analysis Report

|                        |            |               |                             |
|------------------------|------------|---------------|-----------------------------|
| Data Filename          | 0829.d     | Sample Name   | Y1.1                        |
| Instrument Name        | TOF G6230A | Acquired Time | 2024-03-12                  |
| Acq Method             | YCLM       | Acquired SW   | 6200 series TOF/6500 series |
| IRM Calibration Status | Success    |               |                             |
| User Chromatograms     |            |               |                             |

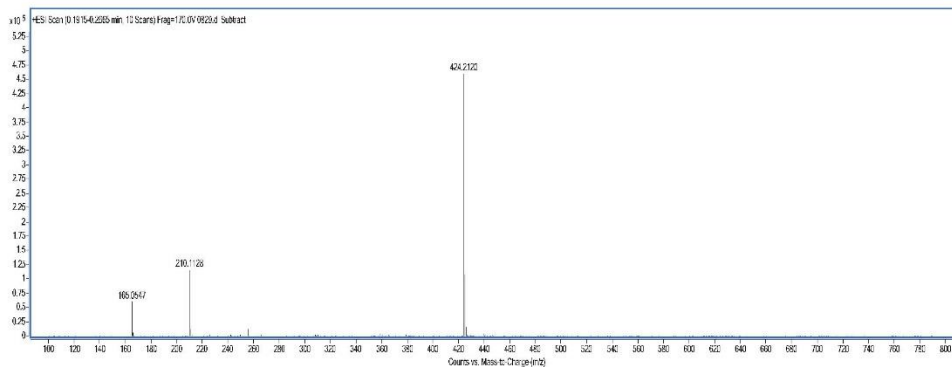

Supplementary Figure S68. HR-ESI-MS spectrum of 8a.

### Qualitative Analysis Report

|                        |            |               |                             |
|------------------------|------------|---------------|-----------------------------|
| Data Filename          | 0830.d     | Sample Name   | Y1.1                        |
| Instrument Name        | TOF G6230A | Acquired Time | 2024-03-12                  |
| Acq Method             | YCLM       | Acquired SW   | 6200 series TOF/6500 series |
| IRM Calibration Status | Success    |               |                             |
| User Chromatograms     |            |               |                             |

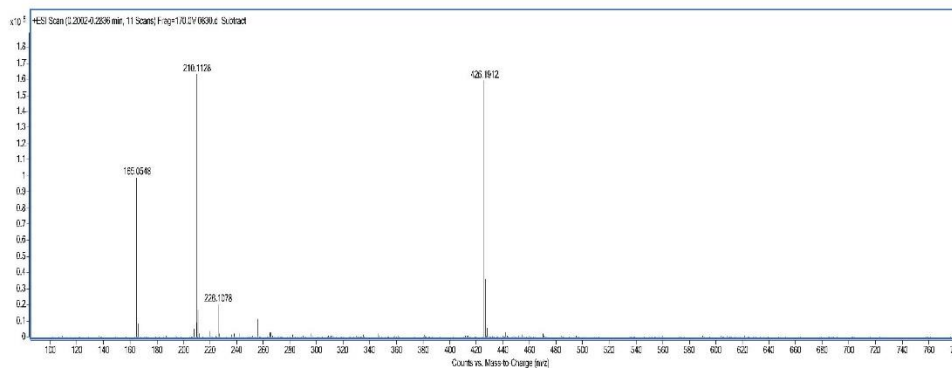

Supplementary Figure S69. HR-ESI-MS spectrum of 9a.

### Qualitative Analysis Report

|                        |            |               |                             |
|------------------------|------------|---------------|-----------------------------|
| Data Filename          | 0831.d     | Sample Name   | YK 1                        |
| Instrument Name        | TOF G6230A | Acquired Time | 2024-03-12                  |
| Acq Method             | YCLM       | Acquired SW   | 6200 series TOF/6500 series |
| IRM Calibration Status | Success    |               |                             |
| User Chromatograms     |            |               |                             |

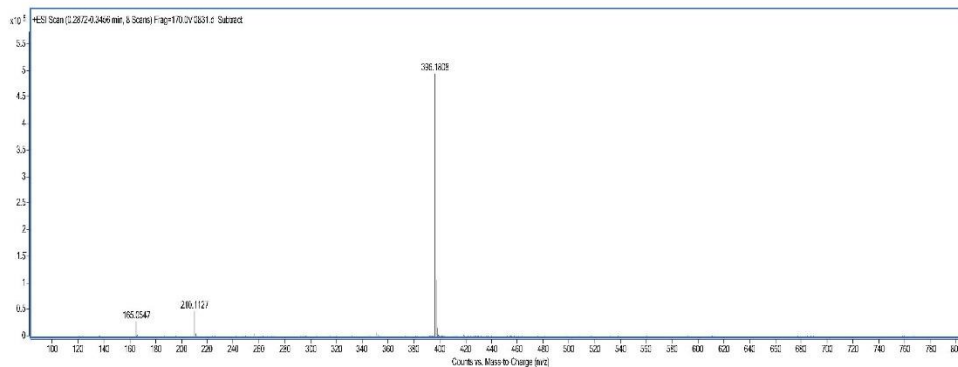

Supplementary Figure S70. HR-ESI-MS spectrum of 10a.

### Qualitative Analysis Report

|                        |            |               |                             |
|------------------------|------------|---------------|-----------------------------|
| Data Filename          | 0832.d     | Sample Name   | YL 1                        |
| Instrument Name        | TOF G6230A | Acquired Time | 2024-03-12                  |
| Acq Method             | YCLM       | Acquired SW   | 6200 series TOF/6500 series |
| IRM Calibration Status | Success    |               |                             |
| User Chromatograms     |            |               |                             |

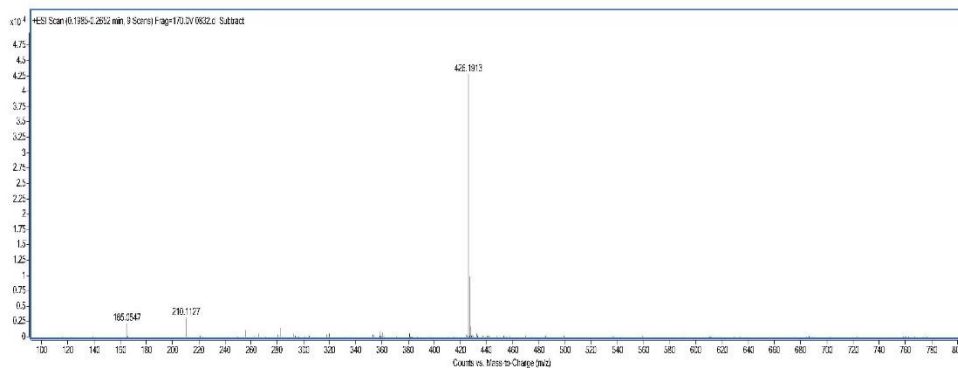

Supplementary Figure S71. HR-ESI-MS spectrum of 11a.

### Qualitative Analysis Report

|                        |            |               |                             |
|------------------------|------------|---------------|-----------------------------|
| Data Filename          | 0833.d     | Sample Name   | YO 1                        |
| Instrument Name        | TOF G6230A | Acquired Time | 2024-03-12                  |
| Acq Method             | YCLM       | Acquired SW   | 6200 series TOF/6500 series |
| IRM Calibration Status | Success    |               |                             |
| User Chromatograms     |            |               |                             |

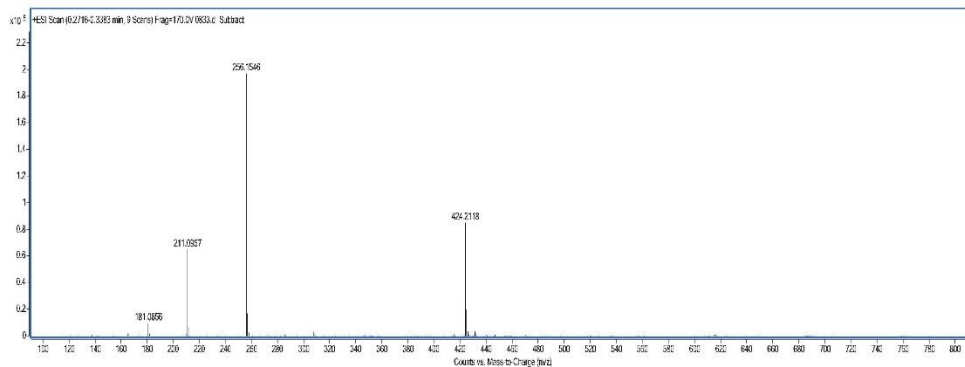

Supplementary Figure S72. HR-ESI-MS spectrum of 12a.

### Qualitative Analysis Report

|                        |            |               |                             |
|------------------------|------------|---------------|-----------------------------|
| Data Filename          | 0834.d     | Sample Name   | YP 1                        |
| Instrument Name        | TOF G6230A | Acquired Time | 2024-03-12                  |
| Acq Method             | YCLM       | Acquired SW   | 6200 series TOF/6500 series |
| IRM Calibration Status | Success    |               |                             |
| User Chromatograms     |            |               |                             |

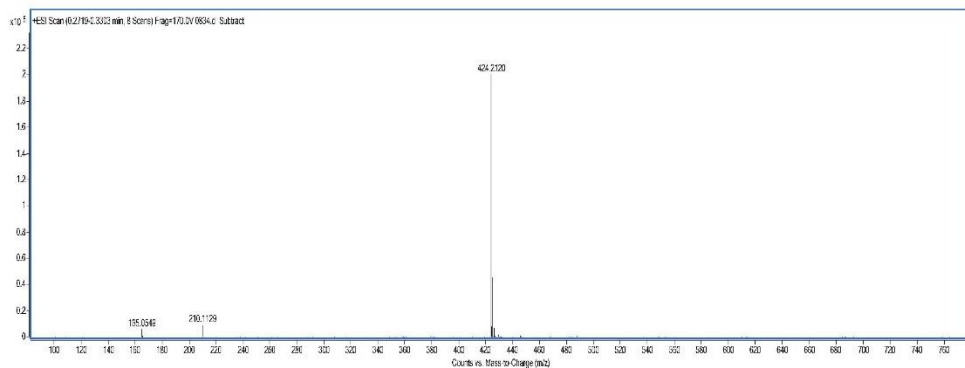

Supplementary Figure S73. HR-ESI-MS spectrum of 13a.



### Qualitative Analysis Report

|                        |            |               |                             |
|------------------------|------------|---------------|-----------------------------|
| Data Filename          | 0835.d     | Sample Name   | YU 1                        |
| Instrument Name        | TOF G6230A | Acquired Time | 2024-03-12                  |
| Acq Method             | YCL.M      | Acquired SW   | 6200 series TOF/6500 series |
| IRM Calibration Status | Success    |               |                             |
| User Chromatograms     |            |               |                             |

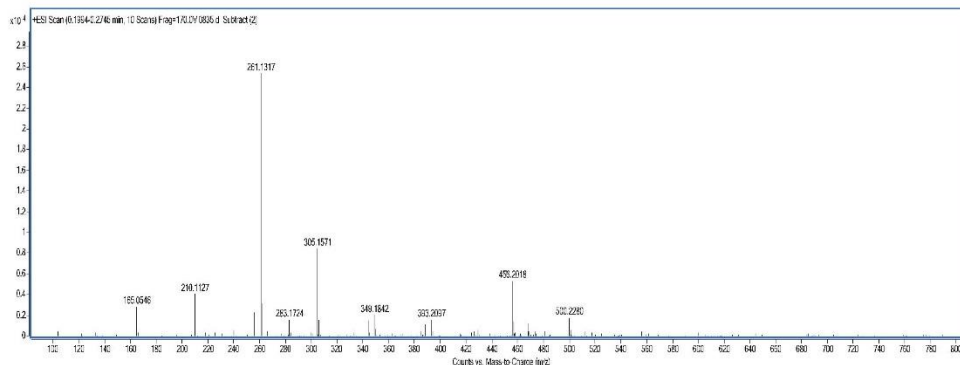

Supplementary Figure S74. HR-ESI-MS spectrum of 14a.

### Qualitative Analysis Report

|                        |            |               |                             |
|------------------------|------------|---------------|-----------------------------|
| Data Filename          | 0836.d     | Sample Name   | YZ 1                        |
| Instrument Name        | TOF G6230A | Acquired Time | 2024-03-12                  |
| Acq Method             | YCL.M      | Acquired SW   | 6200 series TOF/6500 series |
| IRM Calibration Status | Success    |               |                             |
| User Chromatograms     |            |               |                             |

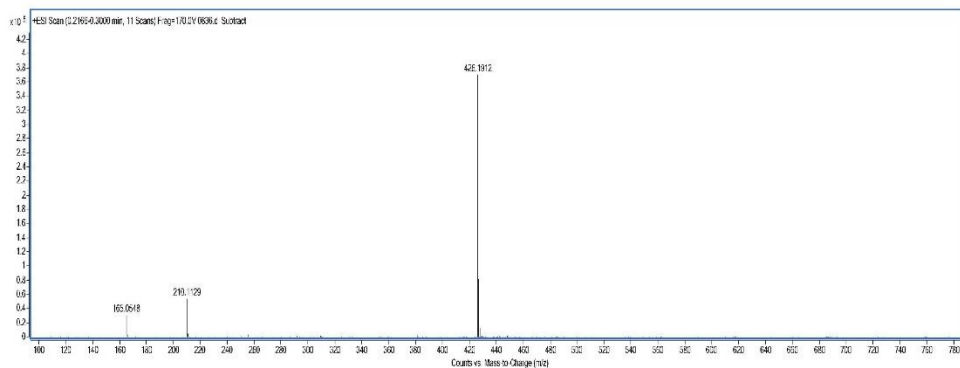

Supplementary Figure S75. HR-ESI-MS spectrum of 15a.

**Section 4:** Concentration-absorbance curve of curcumin derivative acetates **1a-15a**.

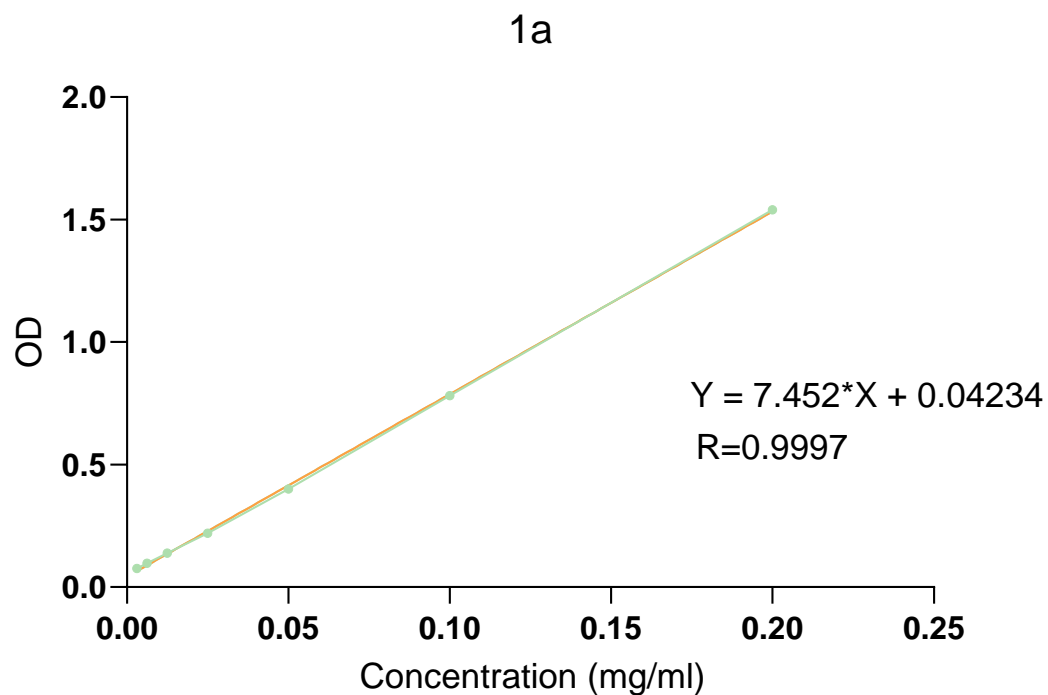

Supplementary Figure S76. Concentration-absorbance curve of **1a**.

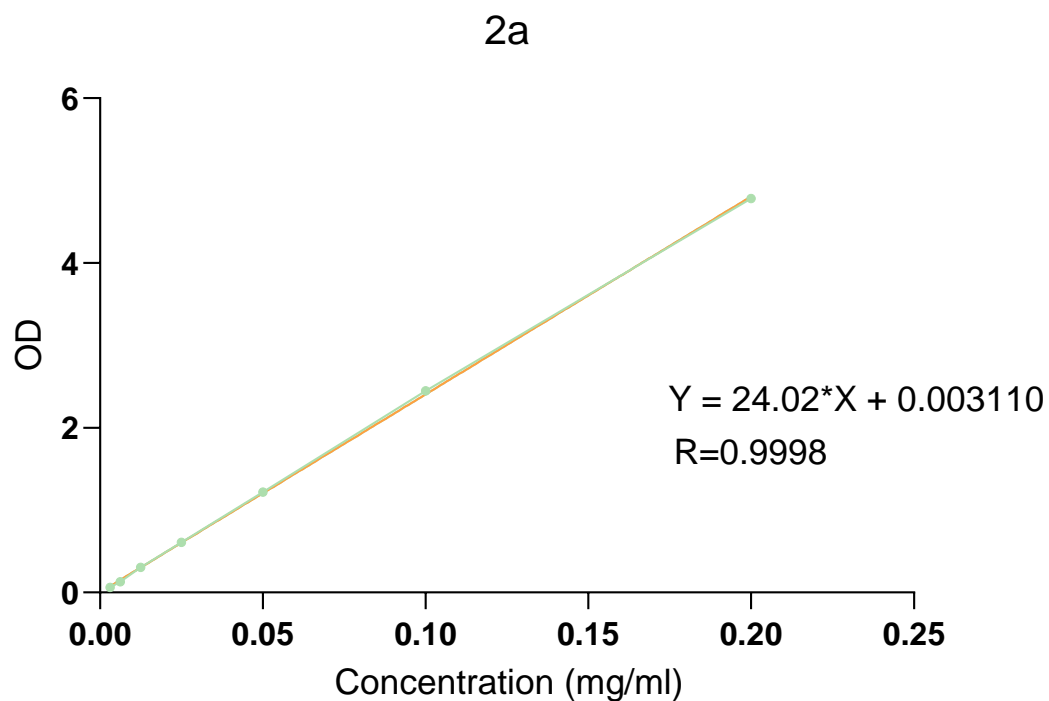

Supplementary Figure S77. Concentration-absorbance curve of **2a**.

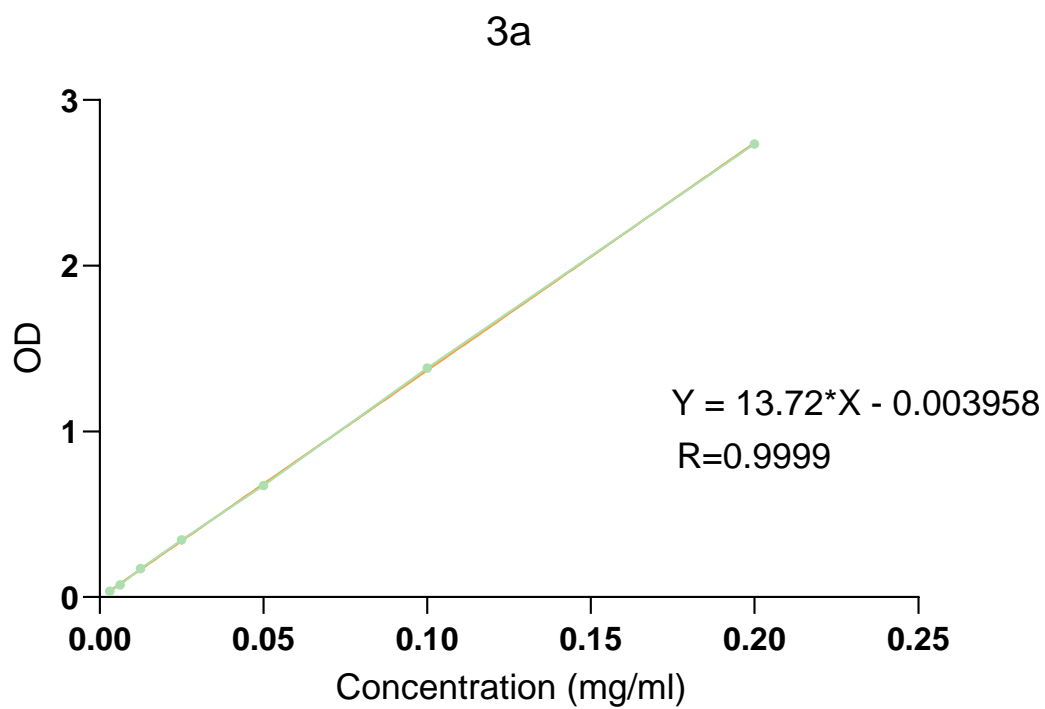

Supplementary Figure S78. Concentration-absorbance curve of 3a.

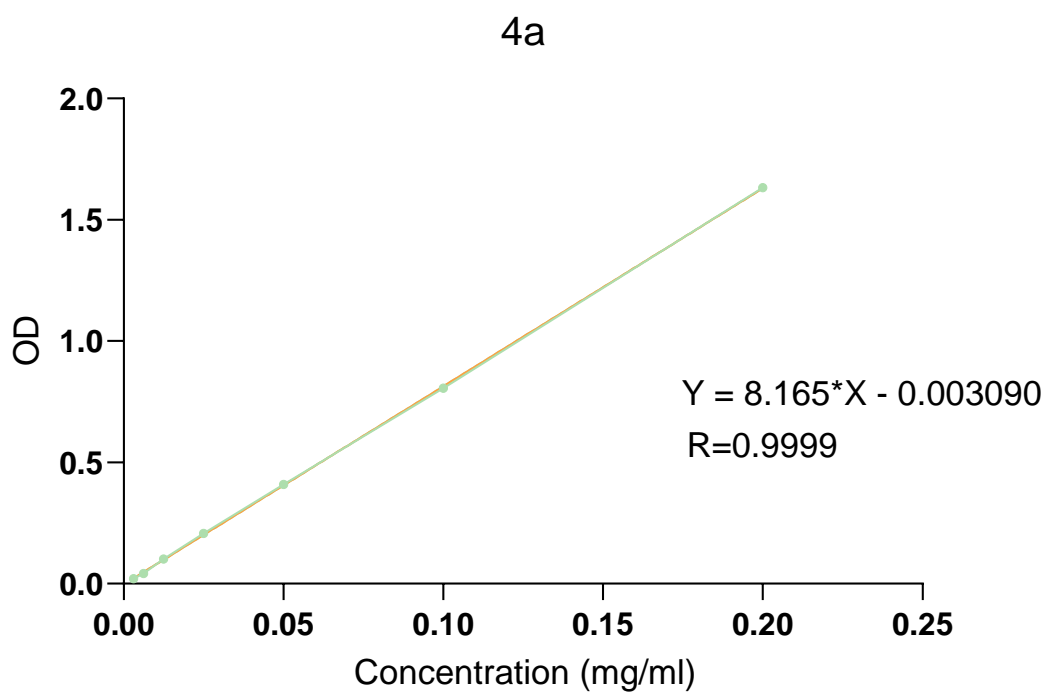

Supplementary Figure S79. Concentration-absorbance curve of 4a.

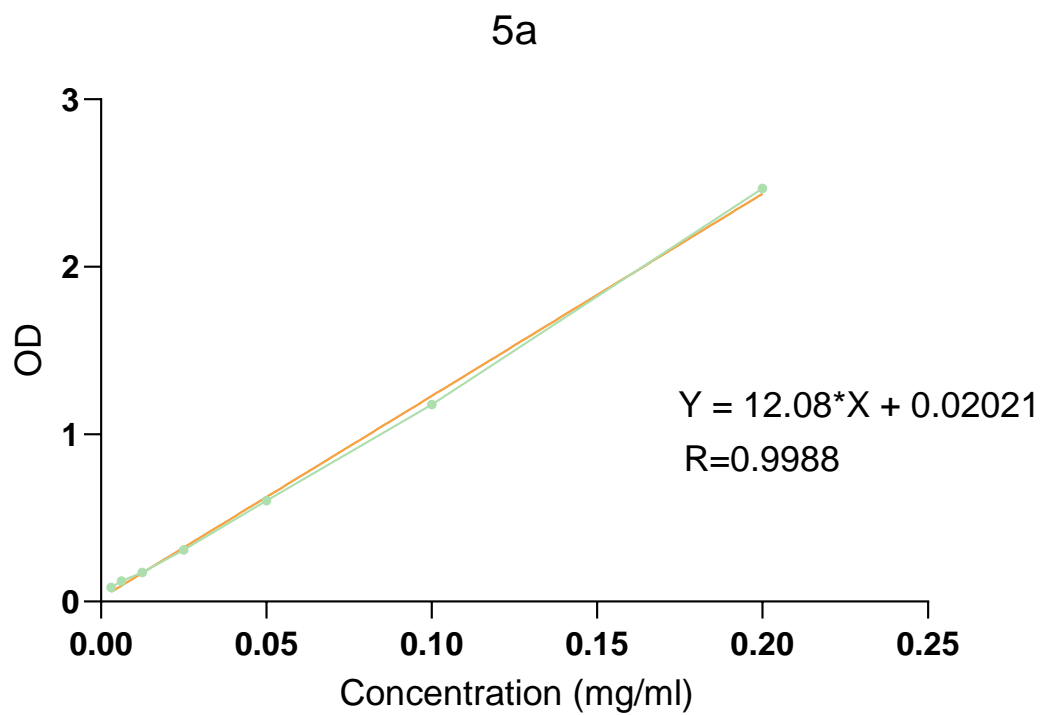

Supplementary Figure S80. Concentration-absorbance curve of 5a.

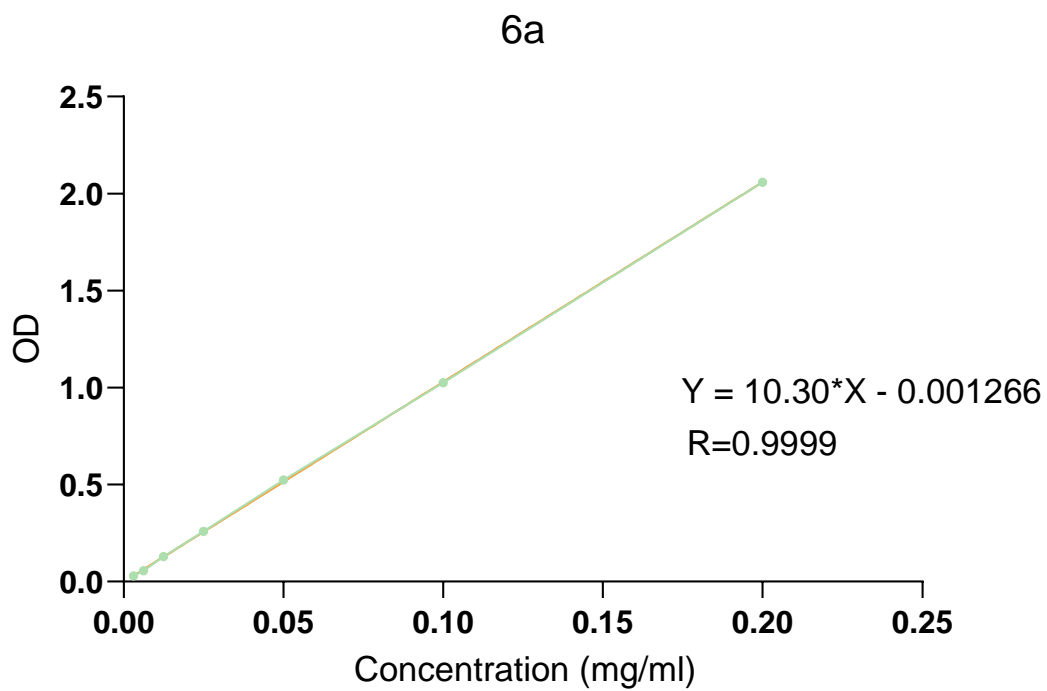

Supplementary Figure S81. Concentration-absorbance curve of 6a.

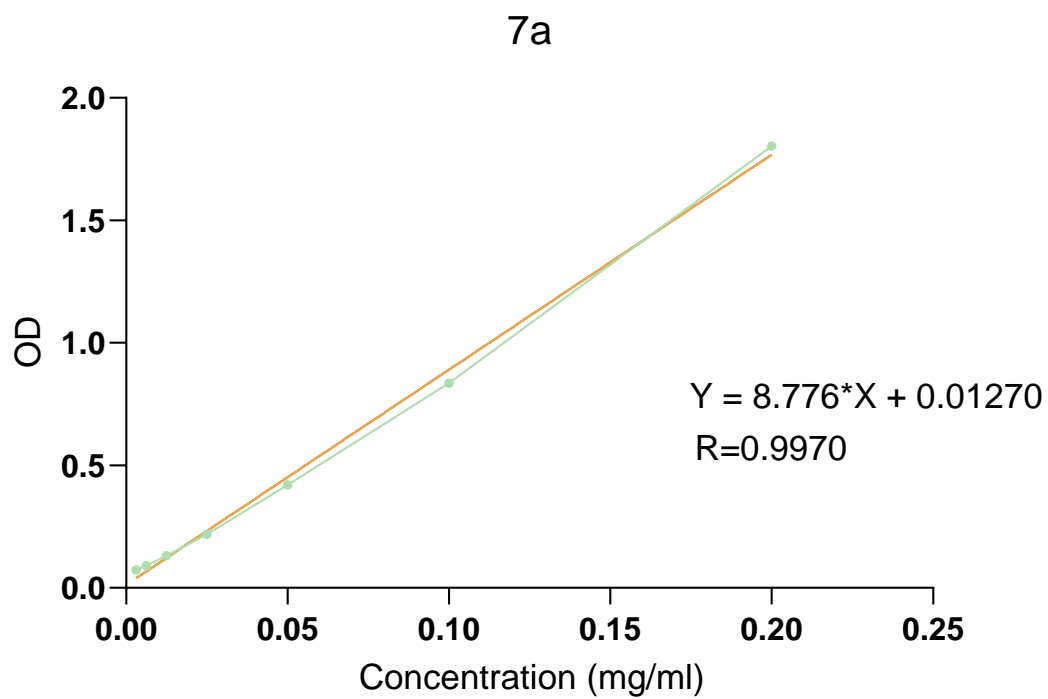

Supplementary Figure S82. Concentration-absorbance curve of 7a.

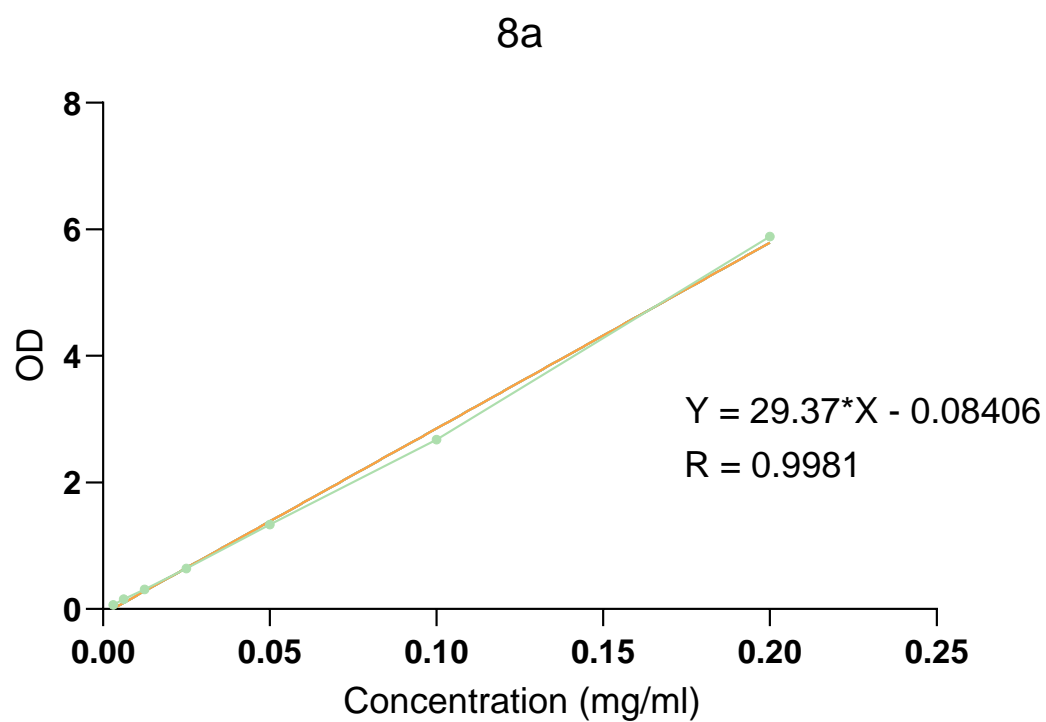

Supplementary Figure S83. Concentration-absorbance curve of 8a.

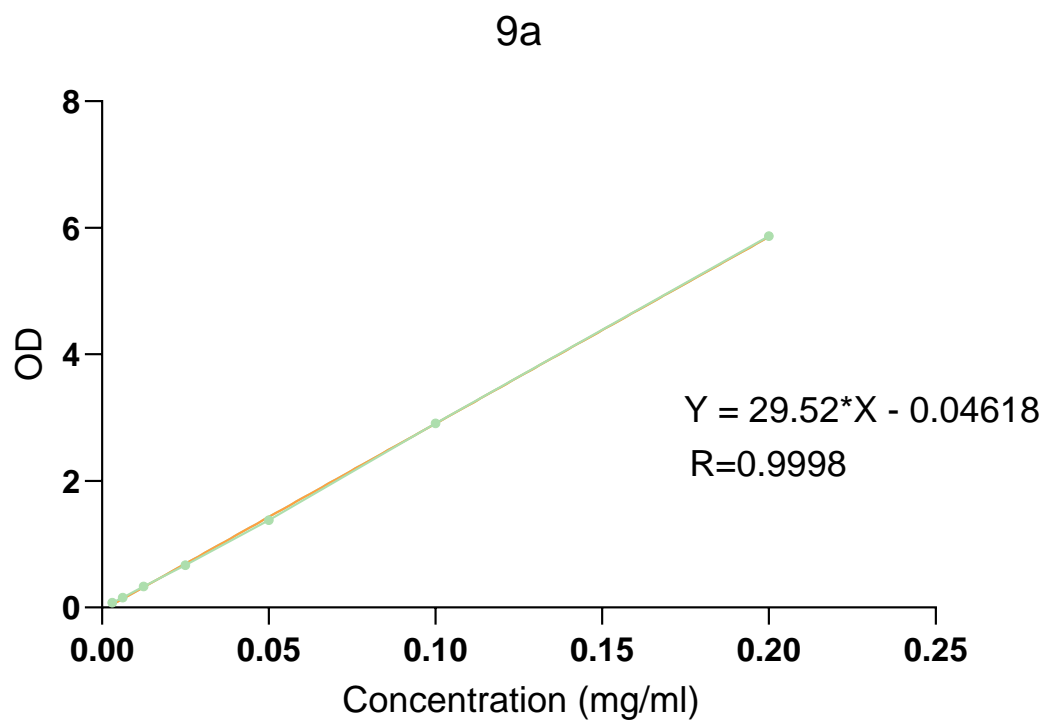

Supplementary Figure S84. Concentration-absorbance curve of 9a.

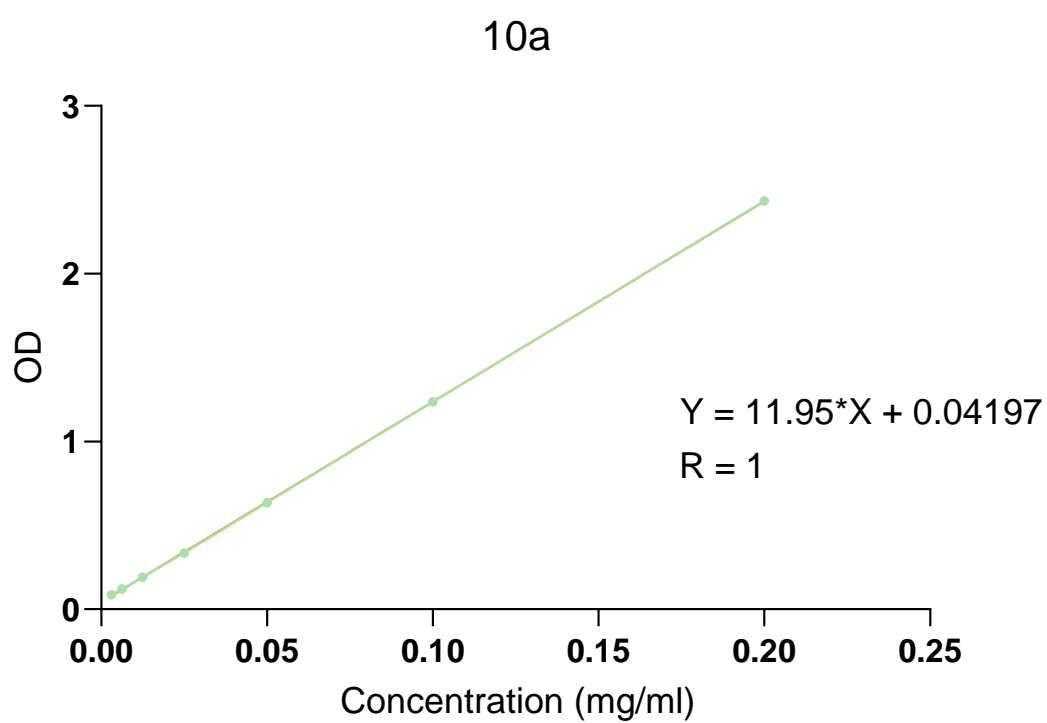

Supplementary Figure S85. Concentration-absorbance curve of 10a.

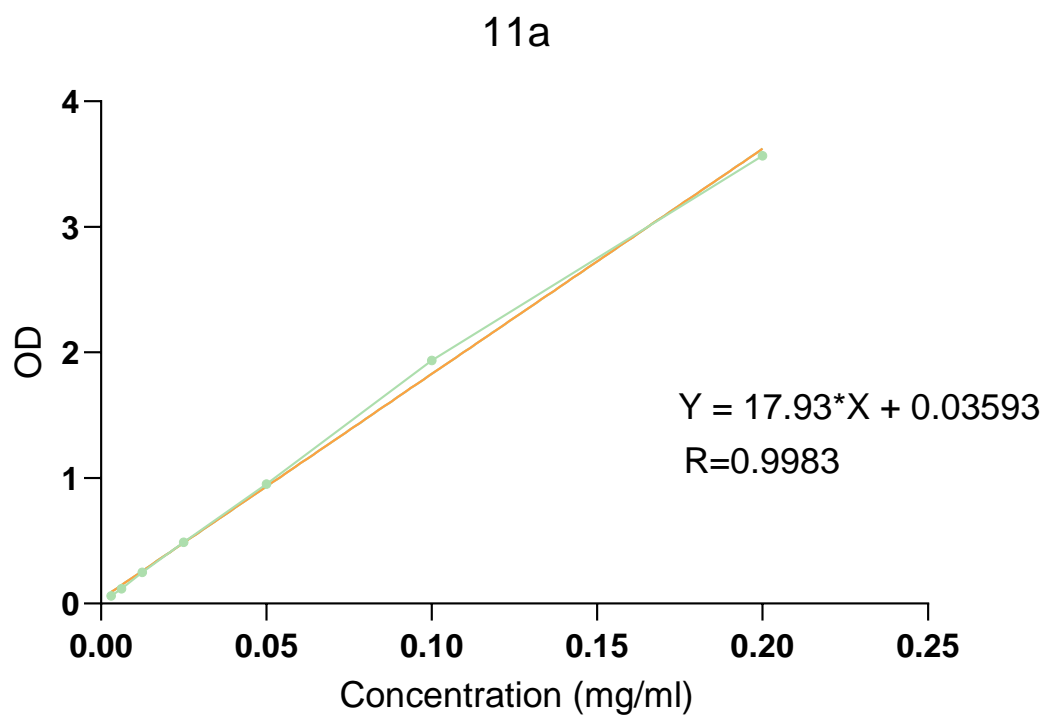

Supplementary Figure S86. Concentration-absorbance curve of **11a**.

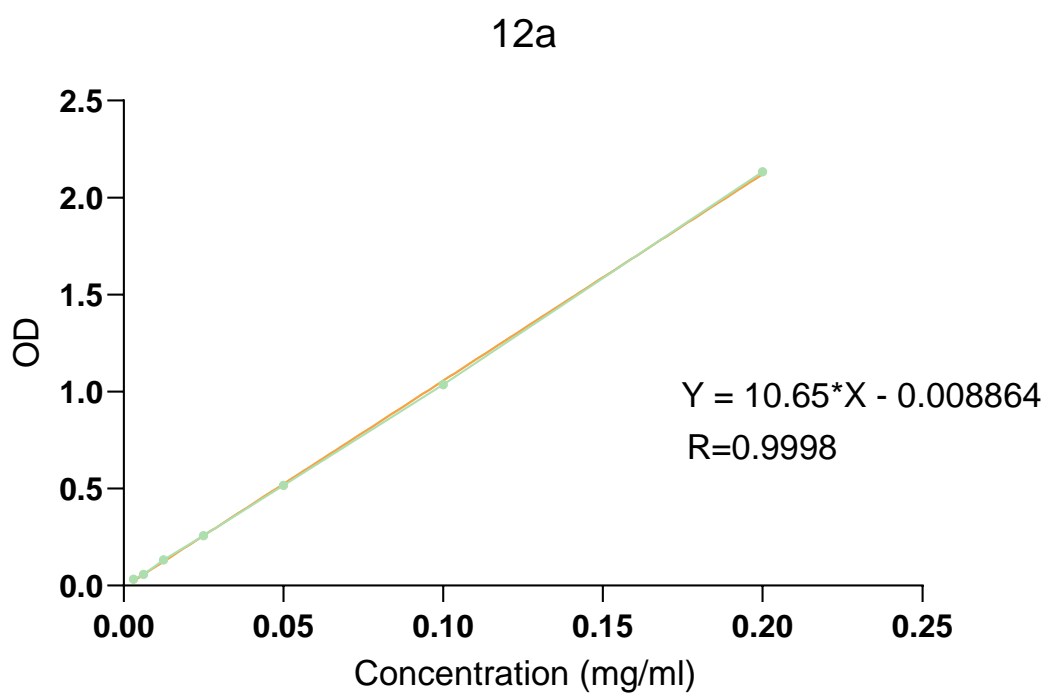

Supplementary Figure S87. Concentration-absorbance curve of **12a**.

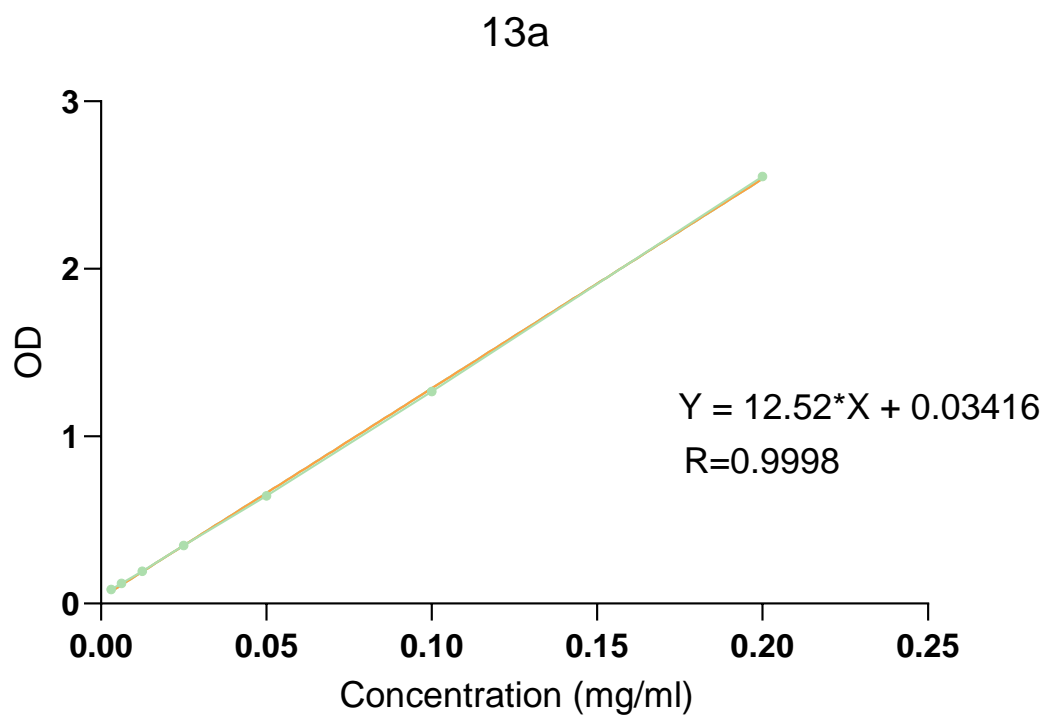

Supplementary Figure S88. Concentration-absorbance curve of 13a.

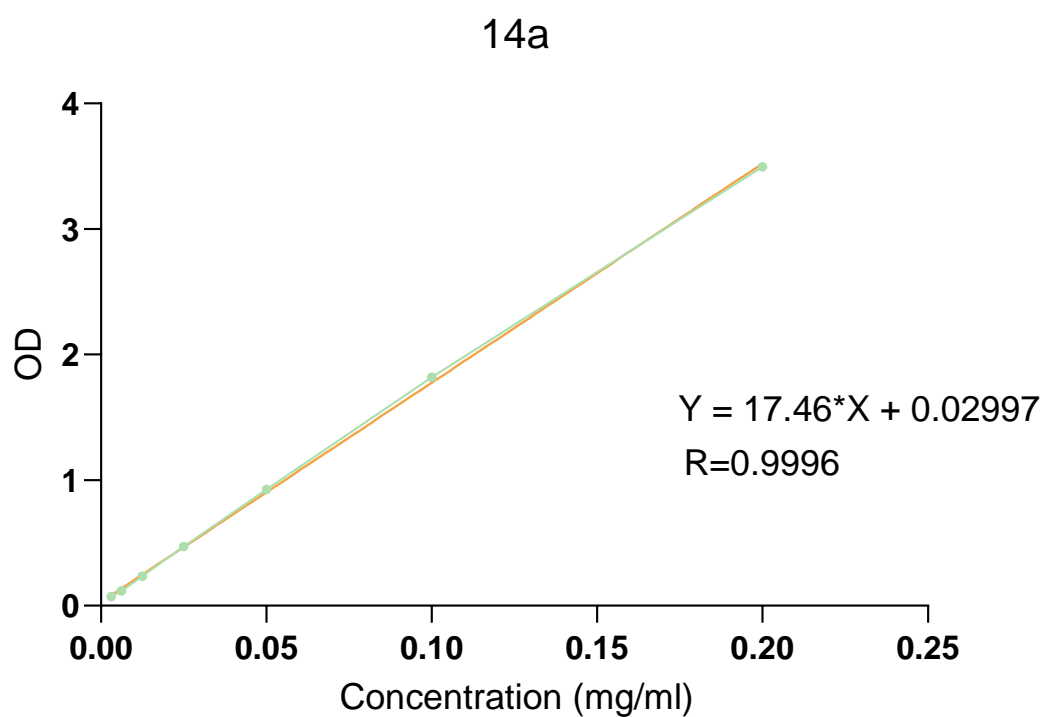

Supplementary Figure S89. Concentration-absorbance curve of 14a.



15a

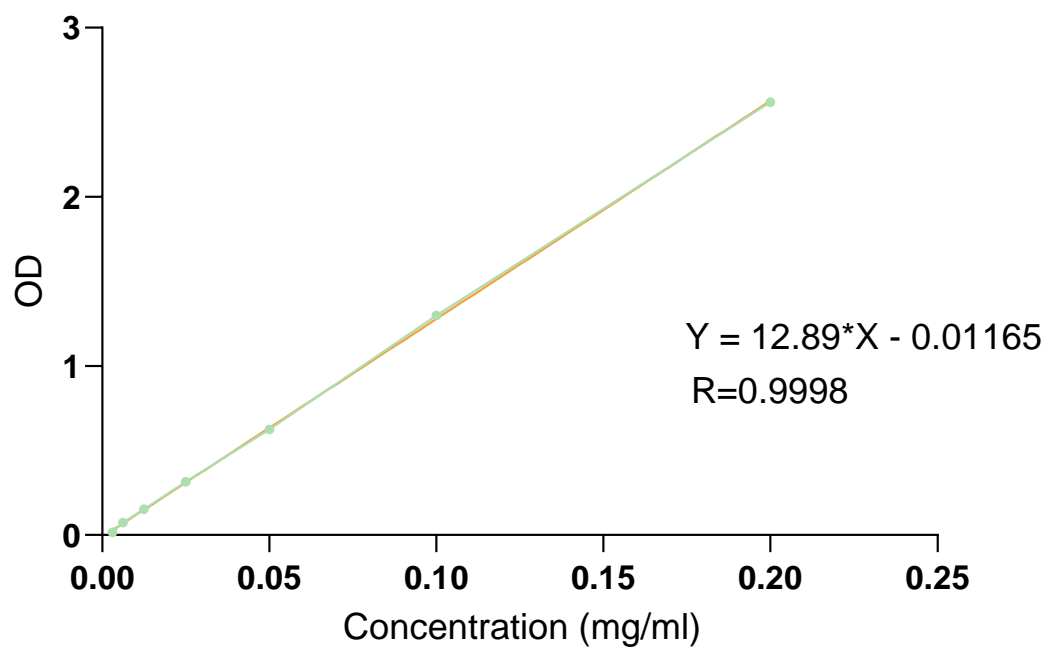

Supplementary Figure S90. Concentration-absorbance curve of **15a**.
